# Supplementary material
Source: publisher figshare collection journal article supplement (https://acs.figshare.com/ndownloader/files/22018446)
Supplement: Supplementary file 1 [file 22018446]

## Supporting Information

### Validation of the Applicability of In-Cell Fast Photochemical Oxidation of Proteins (IC-FPOP) Across Multiple Eukaryotic Cell Lines

Upneet Kaur,<sup>‡</sup> Danté T. Johnson,<sup>†</sup> and Lisa M. Jones,<sup>†</sup>

<sup>‡</sup>Laboratory of Protein Conformation and Dynamics, Biochemistry and Biophysics Center, National Heart, Lung, and Blood Institute , National Institutes of Health , Bethesda , Maryland 20892 , United States.

<sup>†</sup>Department of Pharmaceutical Sciences, University of Maryland, Baltimore, Maryland 21201, United States

\*Correspondence to:

Lisa M. Jones

Department of Pharmaceutical Sciences

University of Maryland, Baltimore, MD 21201

Phone number: (410) 706-3380

Email: [ljones@rx.umaryland.edu](mailto:ljones@rx.umaryland.edu)

#### Table of Contents

|                                                                                                                        |     |
|------------------------------------------------------------------------------------------------------------------------|-----|
| Supplementary Tables.....                                                                                              | S2  |
| Table S1. IC-FPOP oxidatively modified proteins in Vero Cells.....                                                     | S2  |
| Table S2. IC-FPOP oxidatively modified proteins in HEK Cells.....                                                      | S12 |
| Table S3. IC-FPOP oxidatively modified proteins in CHO Cells.....                                                      | S18 |
| Table S4. IC-FPOP oxidatively modified proteins in MCF-10A Cells.....                                                  | S29 |
| Table S5. IC-FPOP oxidatively modified proteins in MCF-7 Cells.....                                                    | S36 |
| Table S6 Oxidatively modified peptides and residues in the fractionated and unfractionated CHO cell samples.....       | S41 |
| Table S7. Peptide modifications per protein oxidatively modified in CHO fractionated and non-fractionated samples..... | S42 |

Table S1. IC-FPOP oxidatively modified proteins in Vero Cells.

| Uniprot ID | Protein Name                                                                          | Biological Replicate        | Number of Modified Peptides |
|------------|---------------------------------------------------------------------------------------|-----------------------------|-----------------------------|
| A8JZY9     | 10 kDa heat shock protein                                                             | Biological Replicate 1 Only | 1                           |
| Q12904-2   | 26S proteasome regulatory subunit 6A                                                  | Biological Replicate 1 Only | 1                           |
| Q16864-2   | 40S ribosomal protein S26                                                             | Biological Replicate 1 Only | 1                           |
| A0A024R663 | 40S ribosomal protein S3                                                              | Biological Replicate 1 Only | 1                           |
| B4EOX8     | 60S acidic ribosomal protein P0                                                       | Biological Replicate 1 Only | 1                           |
| V9HW42     | 60S acidic ribosomal protein P2                                                       | Biological Replicate 1 Only | 1                           |
| O14964     | Acetyl-CoA acetyltransferase                                                          | Biological Replicate 1 Only | 1                           |
| U3KPR7     | Actin                                                                                 | Biological Replicate 1 Only | 1                           |
| Q9NP61     | Actin                                                                                 | Biological Replicate 1 Only | 1                           |
| P08758     | Activated tyrosine kinase PDGFRB                                                      | Biological Replicate 1 Only | 1                           |
| Q16643-3   | Acyl-CoA-binding protein                                                              | Biological Replicate 1 Only | 1                           |
| Q92625     | ADP-ribosylation factor GTPase-activating protein 3                                   | Biological Replicate 1 Only | 1                           |
| P07203     | Alpha-actinin-1                                                                       | Biological Replicate 1 Only | 1                           |
| B7Z4E6     | Alpha-enolase                                                                         | Biological Replicate 1 Only | 1                           |
| Q9P0L0     | Aminoacyl tRNA synthase complex-interacting multifunctional protein 1                 | Biological Replicate 1 Only | 1                           |
| P12109     | Ankyrin repeat and BTB/POZ domain-containing protein 1                                | Biological Replicate 1 Only | 1                           |
| Q86VD1     | Ankyrin repeat and SAM domain-containing protein 1A                                   | Biological Replicate 1 Only | 1                           |
| Q13562     | Ankyrin repeat domain-containing protein 30B                                          | Biological Replicate 1 Only | 1                           |
| A0A173ADH0 | Annexin A5                                                                            | Biological Replicate 1 Only | 1                           |
| A0A024RA42 | Apolipoprotein C-I                                                                    | Biological Replicate 1 Only | 1                           |
| Q9UHV9     | ATP synthase subunit d                                                                | Biological Replicate 1 Only | 1                           |
| P41236     | ATP synthase subunit e                                                                | Biological Replicate 1 Only | 1                           |
| P04844     | ATP-binding cassette sub-family F member 1                                            | Biological Replicate 1 Only | 1                           |
| Q13740     | ATP-dependent RNA helicase A                                                          | Biological Replicate 1 Only | 1                           |
| Q6IAN0     | ATP-dependent RNA helicase DDX42                                                      | Biological Replicate 1 Only | 1                           |
| P55735-3   | Autophagy-related protein 2 homolog B                                                 | Biological Replicate 1 Only | 1                           |
| Q969K4     | Basic leucine zipper and W2 domains 2                                                 | Biological Replicate 1 Only | 1                           |
| O75691     | Biotin--protein ligase ligase ; Biotin-- ligase ; Biotin-- ligase ; Biotin-- ligase ] | Biological Replicate 1 Only | 1                           |
| C9JMV8     | CAD protein                                                                           | Biological Replicate 1 Only | 1                           |
| P54707-2   | Cadherin 5                                                                            | Biological Replicate 1 Only | 1                           |
| B2R960     | Cadherin-6                                                                            | Biological Replicate 1 Only | 1                           |
| A4D111     | Calpain small subunit 1                                                               | Biological Replicate 1 Only | 2                           |
| Q8WZA1-2   | Calpain-10                                                                            | Biological Replicate 1 Only | 1                           |
| Q8N5L1     | Carbohydrate sulfotransferase 5                                                       | Biological Replicate 1 Only | 1                           |
| B1AK88     | Caveolae-associated protein 1                                                         | Biological Replicate 1 Only | 1                           |
| Q13740     | CD166 antigen                                                                         | Biological Replicate 1 Only | 2                           |
| Q92734     | CDV3 homolog                                                                          | Biological Replicate 1 Only | 1                           |
| O60304     | Centromere protein F                                                                  | Biological Replicate 1 Only | 1                           |
| Q2M2I3     | Centrosomal protein of 85 kDa                                                         | Biological Replicate 1 Only | 1                           |
| P55285     | CGI-150 protein                                                                       | Biological Replicate 1 Only | 1                           |
| K7ER00     | Chondroitin sulfate proteoglycan 4                                                    | Biological Replicate 1 Only | 1                           |
| A0A0B4J2C3 | Chromosome 11 open reading frame 58                                                   | Biological Replicate 1 Only | 1                           |
| Q8TD35-2   | Cold shock domain containing E1                                                       | Biological Replicate 1 Only | 1                           |
| B2RAN0     | Collagen alpha-1 chain                                                                | Biological Replicate 1 Only | 1                           |
| B2R665     | Collagen alpha-2 chain                                                                | Biological Replicate 1 Only | 1                           |
| A0A1B0GWD8 | Collagen alpha-5 chain chain)                                                         | Biological Replicate 1 Only | 1                           |
| Q8TDM6     | Collagen                                                                              | Biological Replicate 1 Only | 1                           |
| Q53FP0     | COP9 signalosome complex subunit 3                                                    | Biological Replicate 1 Only | 1                           |
| Q92804     | CSDA protein                                                                          | Biological Replicate 1 Only | 1                           |
| Q6SA08-2   | Cyclic nucleotide-binding domain-containing protein 2                                 | Biological Replicate 1 Only | 1                           |
| P17677-2   | Cyclic nucleotide-gated cation channel beta-1                                         | Biological Replicate 1 Only | 1                           |
| P20827     | Cytohesin-1                                                                           | Biological Replicate 1 Only | 1                           |
| A0A024R4E5 | Cytoplasmic dynein 1 heavy chain 1                                                    | Biological Replicate 1 Only | 1                           |
| Q15149     | Dehydrogenase/reductase SDR family member 7B                                          | Biological Replicate 1 Only | 1                           |
| I3L3U6     | Deleted.                                                                              | Biological Replicate 1 Only | 1                           |
| Q15438     | Disks large homolog 5                                                                 | Biological Replicate 1 Only | 1                           |
| Q86XK7-2   | DnaJ homolog subfamily C member 2                                                     | Biological Replicate 1 Only | 1                           |
| P49593     | Dolichyl-diphosphooligosaccharide--protein glycosyltransferase subunit 2              | Biological Replicate 1 Only | 1                           |
| B2R5M8     | Drebrin-like protein                                                                  | Biological Replicate 1 Only | 1                           |
| O94826     | Dynactin subunit 2                                                                    | Biological Replicate 1 Only | 1                           |
| Q8N394     | Dynein heavy chain 6                                                                  | Biological Replicate 1 Only | 1                           |
| Q75ND3     | E3 SUMO-protein ligase KIAA1586                                                       | Biological Replicate 1 Only | 1                           |
| V9HWF4     | E3 ubiquitin-protein ligase TRIP12                                                    | Biological Replicate 1 Only | 1                           |
| F5H1U9     | E3 UFM1-protein ligase 1                                                              | Biological Replicate 1 Only | 1                           |
| P17980     | Elongation factor 1-alpha 2                                                           | Biological Replicate 1 Only | 1                           |
| B3KS28     | Elongation factor 1-gamma                                                             | Biological Replicate 1 Only | 1                           |
| Q9UNF1     | Elongation factor Ts                                                                  | Biological Replicate 1 Only | 2                           |
| Q6SZW1-2   | EMILIN2 protein                                                                       | Biological Replicate 1 Only | 1                           |

| Uniprot ID | Protein Name                                                 | Biological Replicate        | Number of Modified Peptides |
|------------|--------------------------------------------------------------|-----------------------------|-----------------------------|
| B0FTY2     | Endophilin-A2                                                | Biological Replicate 1 Only | 1                           |
| A0A1W2PP14 | Ephrin-A1                                                    | Biological Replicate 1 Only | 1                           |
| A8K7D9     | Epididymis luminal protein 2                                 | Biological Replicate 1 Only | 1                           |
| A8K781     | Epididymis secretory protein Li 105                          | Biological Replicate 1 Only | 1                           |
| A5YM53     | Epididymis secretory protein Li 112                          | Biological Replicate 1 Only | 1                           |
| B2RAP9     | Epididymis secretory protein Li 34                           | Biological Replicate 1 Only | 1                           |
| A8K4Z4     | Epididymis secretory sperm binding protein Li 129m           | Biological Replicate 1 Only | 1                           |
| V9HVV3     | Eukaryotic translation elongation factor 1 beta 2            | Biological Replicate 1 Only | 1                           |
| Q08211     | Eukaryotic translation initiation factor 3 subunit B         | Biological Replicate 1 Only | 1                           |
| Q96GD7     | Eukaryotic translation initiation factor 3 subunit H         | Biological Replicate 1 Only | 1                           |
| A0A0S2Z4Z9 | Eukaryotic translation initiation factor 6 GCN homolog       | Biological Replicate 1 Only | 1                           |
| Q9UNS2     | FACT complex subunit SPT16                                   | Biological Replicate 1 Only | 1                           |
| P07195     | F-actin-capping protein subunit beta                         | Biological Replicate 1 Only | 1                           |
| D3DND1     | Far upstream element-binding protein 2                       | Biological Replicate 1 Only | 2                           |
| O75947     | Filamin-B                                                    | Biological Replicate 1 Only | 2                           |
| Q6ZMU5     | FLJ00297 protein                                             | Biological Replicate 1 Only | 1                           |
| A8K287     | Fus-like protein                                             | Biological Replicate 1 Only | 1                           |
| Q86T10-2   | General transcription factor 3C polypeptide 3                | Biological Replicate 1 Only | 1                           |
| Q12809     | Glucan                                                       | Biological Replicate 1 Only | 1                           |
| O00410-3   | Glutathione peroxidase 1                                     | Biological Replicate 1 Only | 1                           |
| Q6UVK1     | HEAT repeat-containing protein 5B                            | Biological Replicate 1 Only | 1                           |
| Q14204     | Heat shock 105kDa/110kDa protein 1                           | Biological Replicate 1 Only | 1                           |
| Q9Y3E8     | Heat shock factor-binding protein 1                          | Biological Replicate 1 Only | 1                           |
| D9IAI1     | Hepatocyte growth factor-regulated tyrosine kinase substrate | Biological Replicate 1 Only | 1                           |
| P43897     | Heterogeneous nuclear ribonucleoprotein M                    | Biological Replicate 1 Only | 1                           |
| Q6NZI2     | High density lipoprotein binding protein                     | Biological Replicate 1 Only | 1                           |
| Q15833-3   | Histone acetyltransferase KAT5                               | Biological Replicate 1 Only | 1                           |
| Q9HC10     | Histone H2A                                                  | Biological Replicate 1 Only | 1                           |
| Q5TCU8     | Histone H2B                                                  | Biological Replicate 1 Only | 1                           |
| Q92945     | HSPE1-MOB4 readthrough                                       | Biological Replicate 1 Only | 1                           |
| A0A140VJL3 | Hydroxyacylglutathione hydrolase                             | Biological Replicate 1 Only | 1                           |
| Q59H77     | Hypoxanthine phosphoribosyltransferase                       | Biological Replicate 1 Only | 3                           |
| P37837     | Importin subunit alpha                                       | Biological Replicate 1 Only | 2                           |
| MOQZM1     | Importin-5                                                   | Biological Replicate 1 Only | 1                           |
| Q9NP85     | Insulin-like growth factor-binding protein 3                 | Biological Replicate 1 Only | 1                           |
| Q86SQ0-3   | Insulin-like peptide INSL6                                   | Biological Replicate 1 Only | 1                           |
| P49454     | Interferon gamma                                             | Biological Replicate 1 Only | 2                           |
| P07108-5   | Isocitrate dehydrogenase                                     | Biological Replicate 1 Only | 1                           |
| A8K651     | Isocitrate dehydrogenase subunit alpha                       | Biological Replicate 1 Only | 1                           |
| Q14669-3   | ITGAV protein                                                | Biological Replicate 1 Only | 1                           |
| Q9UJU6-3   | Jupiter microtubule associated homolog 1                     | Biological Replicate 1 Only | 1                           |
| P24752     | Keratin                                                      | Biological Replicate 1 Only | 1                           |
| Q13344     | Kinectin 1                                                   | Biological Replicate 1 Only | 1                           |
| A0A024R3W7 | L-lactate dehydrogenase B chain                              | Biological Replicate 1 Only | 2                           |
| Q13561-2   | LPP protein                                                  | Biological Replicate 1 Only | 1                           |
| D3DQU7     | Mediator of RNA polymerase II transcription subunit 24       | Biological Replicate 1 Only | 1                           |
| P56537     | Melanoma-associated antigen D2                               | Biological Replicate 1 Only | 1                           |
| A8K984     | Metastasis-associated protein MTA1                           | Biological Replicate 1 Only | 1                           |
| P43694-2   | MHC class I antigen                                          | Biological Replicate 1 Only | 1                           |
| O75506     | MHC class II antigen                                         | Biological Replicate 1 Only | 3                           |
| Q9BRU9     | MIT domain-containing protein 1                              | Biological Replicate 1 Only | 1                           |
| P20020     | Mitochondrial import receptor subunit TOM70                  | Biological Replicate 1 Only | 1                           |
| Q63HR2-4   | MORC family CW-type zinc finger protein 1                    | Biological Replicate 1 Only | 1                           |
| B9EGE7     | Multiple PDZ domain protein                                  | Biological Replicate 1 Only | 1                           |
| Q6PEY2     | Myosin light polypeptide 6                                   | Biological Replicate 1 Only | 1                           |
| O00267     | Myristoylated alanine-rich C-kinase substrate                | Biological Replicate 1 Only | 1                           |
| A0A024R0E2 | -N-acylphosphatidylethanolamine lipase                       | Biological Replicate 1 Only | 1                           |
| P10586     | NAD transhydrogenase                                         | Biological Replicate 1 Only | 1                           |
| Q9C0G6     | NADH dehydrogenase 1 alpha subcomplex assembly factor 4      | Biological Replicate 1 Only | 1                           |
| A0A140VK83 | Neudesin                                                     | Biological Replicate 1 Only | 1                           |
| B7Z4Q5     | Neurobeachin                                                 | Biological Replicate 1 Only | 1                           |
| Q9UG12     | Neurogenic differentiation factor 1                          | Biological Replicate 1 Only | 1                           |
| L7RRS0     | Neuromodulin                                                 | Biological Replicate 1 Only | 1                           |
| Q16775     | Neuroplastin                                                 | Biological Replicate 1 Only | 1                           |
| Q13586     | Neurosecretory protein VGF ]                                 | Biological Replicate 1 Only | 1                           |
| Q58FG1     | Neutral alpha-glucosidase AB                                 | Biological Replicate 1 Only | 1                           |
| B2RA03     | Non-POU domain containing octamer-binding isoform 1          | Biological Replicate 1 Only | 3                           |
| Q86XP3     | N-terminal Xaa-Pro-Lys N-methyltransferase 1                 | Biological Replicate 1 Only | 1                           |
| Q86UV5-8   | Nuclear distribution protein nudE homolog 1                  | Biological Replicate 1 Only | 1                           |

| Uniprot ID | Protein Name                                                             | Biological Replicate        | Number of Modified Peptides |
|------------|--------------------------------------------------------------------------|-----------------------------|-----------------------------|
| O75369     | Nuclear RNA export factor 1                                              | Biological Replicate 1 Only | 2                           |
| Q8NE71     | NudC-like protein                                                        | Biological Replicate 1 Only | 1                           |
| Q8NF72     | Otoferlin                                                                | Biological Replicate 1 Only | 1                           |
| Q13330     | PCTAIRE protein kinase 2                                                 | Biological Replicate 1 Only | 1                           |
| Q99543-2   | PDZ and LIM domain protein 7                                             | Biological Replicate 1 Only | 1                           |
| B4DV79     | Phenylalanine--tRNA ligase alpha subunit                                 | Biological Replicate 1 Only | 1                           |
| D6RGD1     | Phosphatidylinositol-4-phosphate 3-kinase                                | Biological Replicate 1 Only | 1                           |
| P23396     | Phosphoglycerate kinase                                                  | Biological Replicate 1 Only | 1                           |
| A0A024RDS1 | Plasma membrane calcium-transporting ATPase 1                            | Biological Replicate 1 Only | 1                           |
| B4DTN5     | Pleckstrin homology-like domain family B member 2                        | Biological Replicate 1 Only | 1                           |
| P07602     | Podocin                                                                  | Biological Replicate 1 Only | 1                           |
| P08151     | Potassium voltage-gated channel subfamily H member 2                     | Biological Replicate 1 Only | 1                           |
| K7EPF9     | Potassium voltage-gated channel subfamily KQT member 4                   | Biological Replicate 1 Only | 1                           |
| O94874     | Potassium-transporting ATPase alpha chain 2 /K ATPase subunit alpha)     | Biological Replicate 1 Only | 1                           |
| P09493-10  | Prefoldin subunit 2                                                      | Biological Replicate 1 Only | 2                           |
| V9HW92     | Prefoldin subunit 3                                                      | Biological Replicate 1 Only | 1                           |
| P29966     | Prosaposin                                                               | Biological Replicate 1 Only | 1                           |
| P38606     | Proteasome 26S non-ATPase subunit 2 variant                              | Biological Replicate 1 Only | 1                           |
| B4DW52     | Protein disulfide-isomerase                                              | Biological Replicate 1 Only | 5                           |
| Q9NXZ1     | Protein disulfide-isomerase                                              | Biological Replicate 1 Only | 1                           |
| Q96M20     | Protein FAM240C                                                          | Biological Replicate 1 Only | 1                           |
| P50747     | Protein FAM83E                                                           | Biological Replicate 1 Only | 1                           |
| P05997     | Protein LKAAEAR1                                                         | Biological Replicate 1 Only | 1                           |
| Q6ZU15     | Protein O-linked-mannose beta-1                                          | Biological Replicate 1 Only | 1                           |
| Q6P2H3     | Protein O-mannosyl-transferase TMTC2                                     | Biological Replicate 1 Only | 1                           |
| B7ZLW0     | Protein phosphatase 1                                                    | Biological Replicate 1 Only | 1                           |
| A0A0K0K1L8 | Protein phosphatase 1F /calmodulin-dependent protein kinase phosphatase) | Biological Replicate 1 Only | 1                           |
| Q9NQC3     | Protein phosphatase inhibitor 2                                          | Biological Replicate 1 Only | 1                           |
| Q86YL5-2   | Protein PRRC2C                                                           | Biological Replicate 1 Only | 1                           |
| B4DPA0     | Protein SEC13 homolog                                                    | Biological Replicate 1 Only | 1                           |
| Q9UMX5     | Protein TFG                                                              | Biological Replicate 1 Only | 1                           |
| Q9NR12-3   | Putative heat shock protein HSP 90-alpha A4                              | Biological Replicate 1 Only | 2                           |
| D3DWY7     | Pyridoxine 5'-phosphate oxidase variant                                  | Biological Replicate 1 Only | 1                           |
| V9HW98     | RAB21                                                                    | Biological Replicate 1 Only | 1                           |
| Q14614     | RABGGTA protein                                                          | Biological Replicate 1 Only | 1                           |
| A0A024RB14 | Radixin                                                                  | Biological Replicate 1 Only | 1                           |
| Q9UK76     | Regulator complex protein LAMTOR1                                        | Biological Replicate 1 Only | 1                           |
| A8K8P1     | Receptor-type tyrosine-protein phosphatase alpha                         | Biological Replicate 1 Only | 1                           |
| A0A140VK53 | Receptor-type tyrosine-protein phosphatase F                             | Biological Replicate 1 Only | 1                           |
| Q96MQ0     | Reticulon-4                                                              | Biological Replicate 1 Only | 1                           |
| A0A1G4P1I6 | Rho guanine nucleotide exchange factor 2                                 | Biological Replicate 1 Only | 1                           |
| A0A024R1N1 | RNA binding motif protein 3                                              | Biological Replicate 1 Only | 1                           |
| Q7Z6E5     | rRNA-processing protein UTP23 homolog                                    | Biological Replicate 1 Only | 1                           |
| Q92993-3   | Ryanodine receptor 3                                                     | Biological Replicate 1 Only | 1                           |
| Q9BV86-2   | Sarcoma antigen 1                                                        | Biological Replicate 1 Only | 1                           |
| Q59FX5     | Septin-14                                                                | Biological Replicate 1 Only | 1                           |
| A8TX70     | Serine/threonine kinase 33                                               | Biological Replicate 1 Only | 1                           |
| P35241     | SF3B1 protein                                                            | Biological Replicate 1 Only | 1                           |
| Q9P032     | Similar to Chain                                                         | Biological Replicate 1 Only | 1                           |
| F5GXV7     | Small subunit processome component 20 homolog                            | Biological Replicate 1 Only | 1                           |
| O15240     | Solute carrier family 2                                                  | Biological Replicate 1 Only | 1                           |
| Q14028     | Sp3 transcription factor variant                                         | Biological Replicate 1 Only | 1                           |
| Q9HC16     | Sperm flagellar protein 2                                                | Biological Replicate 1 Only | 1                           |
| Q9GZS9-2   | SIAR-related lipid transfer protein 9                                    | Biological Replicate 1 Only | 1                           |
| Q59EA3     | Sterile alpha and TIR motif-containing protein 1                         | Biological Replicate 1 Only | 1                           |
| B2RD14     | Stromal interaction molecule 1                                           | Biological Replicate 1 Only | 1                           |
| A0PJH5     | Structural maintenance of chromosomes protein                            | Biological Replicate 1 Only | 1                           |
| B4DVA0     | Sulfate_transp domain-containing protein                                 | Biological Replicate 1 Only | 1                           |
| Q6IAA8     | Synaptosomal-associated protein                                          | Biological Replicate 1 Only | 1                           |
| P26641-2   | Syntaxin-binding protein 2                                               | Biological Replicate 1 Only | 1                           |
| A8K9A5     | TATA-binding protein-associated factor 2N 68)                            | Biological Replicate 1 Only | 1                           |
| J3QSS5     | TBC1 domain family member 1                                              | Biological Replicate 1 Only | 1                           |
| P50213     | T-complex protein 1 subunit delta                                        | Biological Replicate 1 Only | 1                           |
| E9PRZ9     | T-complex protein 1 subunit gamma                                        | Biological Replicate 1 Only | 1                           |
| Q9Y520-7   | T-complex protein 10A homolog 2                                          | Biological Replicate 1 Only | 1                           |
| Q14532     | Tensin-2                                                                 | Biological Replicate 1 Only | 1                           |
| Q96BY7     | Testicular secretory protein Li 53                                       | Biological Replicate 1 Only | 1                           |
| Q9Y5Q9     | Testis anion transporter 1                                               | Biological Replicate 1 Only | 1                           |
| V9GYM8     | Testis development-related protein                                       | Biological Replicate 1 Only | 1                           |

| Uniprot ID | Protein Name                                                     | Biological Replicate        | Number of Modified Peptides |
|------------|------------------------------------------------------------------|-----------------------------|-----------------------------|
| P27708     | Testis-specific serine/threonine-protein kinase 4                | Biological Replicate 1 Only | 1                           |
| A0A024RBH0 | Tetraspanin-32                                                   | Biological Replicate 1 Only | 1                           |
| A8K3A8     | Thimet oligopeptidase                                            | Biological Replicate 1 Only | 1                           |
| Q9Y639     | Transaldolase                                                    | Biological Replicate 1 Only | 2                           |
| S4R3N1     | Transcription elongation factor SPT5                             | Biological Replicate 1 Only | 1                           |
| F5H6T0     | Transcription factor GATA-4                                      | Biological Replicate 1 Only | 1                           |
| P07437     | Translationally-controlled tumor protein                         | Biological Replicate 1 Only | 4                           |
| Q59ET0     | Tripartite motif-containing protein 72                           | Biological Replicate 1 Only | 1                           |
| Q9NPG3     | tRNA wybutosine-synthesizing protein 5 (wyosine-C)-hydroxylase)  | Biological Replicate 1 Only | 1                           |
| P63261     | Tropomyosin 3 isoform 1                                          | Biological Replicate 1 Only | 7                           |
| Q14697-2   | Tropomyosin alpha-1 chain                                        | Biological Replicate 1 Only | 1                           |
| Q9P2P6     | Tubulin alpha chain                                              | Biological Replicate 1 Only | 1                           |
| P61604     | Tubulin alpha chain                                              | Biological Replicate 1 Only | 1                           |
| A0A0S2Z4G4 | Tubulin alpha-3E chain                                           | Biological Replicate 1 Only | 2                           |
| H0YK48     | Tubulin beta chain                                               | Biological Replicate 1 Only | 1                           |
| A0A024QYX3 | Tubulin beta chain                                               | Biological Replicate 1 Only | 1                           |
| A0A024R017 | Tubulin beta-4A chain                                            | Biological Replicate 1 Only | 1                           |
| Q7Z3V9     | Ubinuclein-1                                                     | Biological Replicate 1 Only | 1                           |
| B3KS98     | Ubiquitin carboxyl-terminal hydrolase                            | Biological Replicate 1 Only | 1                           |
| P52888     | Ubiquitin carboxyl-terminal hydrolase                            | Biological Replicate 1 Only | 1                           |
| Q13423     | Ubiquitin carboxyl-terminal hydrolase 48                         | Biological Replicate 1 Only | 1                           |
| P17936-2   | Uncharacterized protein DKFZp566C233                             | Biological Replicate 1 Only | 1                           |
| P56696     | Uncharacterized protein DKFZp686E1183                            | Biological Replicate 1 Only | 1                           |
| B4DPZ4     | Uncharacterized protein DKFZp779G2251                            | Biological Replicate 1 Only | 1                           |
| B2R6L2     | Unconventional myosin-X                                          | Biological Replicate 1 Only | 1                           |
| Q9NXR1     | Vacuolar protein sorting-associated protein 37C                  | Biological Replicate 1 Only | 1                           |
| Q8IU66     | Vesicle-associated membrane protein-associated protein A         | Biological Replicate 1 Only | 1                           |
| A0A024R8E5 | von Willebrand factor A domain-containing protein 3A             | Biological Replicate 1 Only | 1                           |
| Q6FHF7     | V-set and immunoglobulin domain-containing protein 1             | Biological Replicate 1 Only | 1                           |
| A0A024RBA9 | V-type proton ATPase catalytic subunit A                         | Biological Replicate 1 Only | 2                           |
| Q9Y5B9     | V-type proton ATPase subunit F                                   | Biological Replicate 1 Only | 1                           |
| P56385     | Zinc finger FYVE domain-containing protein 26                    | Biological Replicate 1 Only | 1                           |
| E9PIH7     | Zinc finger protein 500                                          | Biological Replicate 1 Only | 1                           |
| J3KSL1     | Zinc finger protein GLI1                                         | Biological Replicate 1 Only | 1                           |
| A8K9Y8     | ZNF507 protein                                                   | Biological Replicate 1 Only | 1                           |
| V5LXD0     | 14-3-3 protein gamma                                             | Biological Replicate 2 Only | 1                           |
| H7C0X8     | 39S ribosomal protein L37                                        | Biological Replicate 2 Only | 1                           |
| A0A0U4BW16 | 40S ribosomal protein S21                                        | Biological Replicate 2 Only | 9                           |
| Q549N0     | 40S ribosomal protein S27                                        | Biological Replicate 2 Only | 1                           |
| P26196     | 40S ribosomal protein S27                                        | Biological Replicate 2 Only | 1                           |
| K7N7A8     | 40S ribosomal protein S5                                         | Biological Replicate 2 Only | 1                           |
| A0A096LP69 | 40S ribosomal protein S6                                         | Biological Replicate 2 Only | 1                           |
| P07737     | 40S ribosomal protein S7                                         | Biological Replicate 2 Only | 2                           |
| Q96BN8     | 4F2 cell-surface antigen heavy chain                             | Biological Replicate 2 Only | 1                           |
| B2RDE1     | 60 kDa chaperonin                                                | Biological Replicate 2 Only | 2                           |
| Q9Y2I6     | 60S ribosomal protein L4                                         | Biological Replicate 2 Only | 1                           |
| B4E368     | 60S ribosomal protein L5                                         | Biological Replicate 2 Only | 1                           |
| F8VR31     | A disintegrin and metalloproteinase with thrombospondin motifs 2 | Biological Replicate 2 Only | 1                           |
| Q6IBK0     | Acetyltransferase component of pyruvate dehydrogenase complex    | Biological Replicate 2 Only | 1                           |
| Q9NS93     | Actin-like protein                                               | Biological Replicate 2 Only | 1                           |
| Q86VS8     | Adenosine deaminase domain-containing protein 1                  | Biological Replicate 2 Only | 1                           |
| Q16715     | Adhesion G-protein coupled receptor G6                           | Biological Replicate 2 Only | 1                           |
| Q59F99     | A-kinase anchor protein 9                                        | Biological Replicate 2 Only | 1                           |
| B4DY90     | Aldo-keto reductase family 1 member A1                           | Biological Replicate 2 Only | 6                           |
| Q8N0Y7     | Alpha-actinin-4                                                  | Biological Replicate 2 Only | 1                           |
| B2RBR9     | Annexin                                                          | Biological Replicate 2 Only | 2                           |
| J3KNS1     | Apolipoprotein A-IV                                              | Biological Replicate 2 Only | 1                           |
| Q7Z333-4   | Apolipoprotein E isoform 2                                       | Biological Replicate 2 Only | 1                           |
| A0A024R5K1 | Apoptosis regulator BAX                                          | Biological Replicate 2 Only | 1                           |
| P10606     | Arf-GAP with coiled-coil                                         | Biological Replicate 2 Only | 1                           |
| Q13439-5   | Armadillo repeat-containing protein 6                            | Biological Replicate 2 Only | 1                           |
| Q8WXW3     | Aryl-hydrocarbon receptor interacting protein                    | Biological Replicate 2 Only | 1                           |
| E9PKW4     | Asparagine--tRNA ligase                                          | Biological Replicate 2 Only | 1                           |
| H0Y586     | Aspartyl/asparaginyl beta-hydroxylase                            | Biological Replicate 2 Only | 1                           |
| Q6ZUL3     | ATP-dependent RNA helicase TDRD9                                 | Biological Replicate 2 Only | 1                           |
| B4DJ09     | Atrophin 1                                                       | Biological Replicate 2 Only | 1                           |
| Q6GPH4     | Autophagy-related protein 13                                     | Biological Replicate 2 Only | 1                           |
| P07951-3   | Band 4.1-like protein 2                                          | Biological Replicate 2 Only | 1                           |
| B9VP19     | Beta actin                                                       | Biological Replicate 2 Only | 1                           |

| Uniprot ID | Protein Name                                                 | Biological Replicate        | Number of Modified Peptides |
|------------|--------------------------------------------------------------|-----------------------------|-----------------------------|
| P11388-4   | Bromodomain testis-specific protein                          | Biological Replicate 2 Only | 1                           |
| B4E1C2     | Caldesmon                                                    | Biological Replicate 2 Only | 1                           |
| A0A140VJR0 | Calmodulin-like protein 3                                    | Biological Replicate 2 Only | 1                           |
| Q9Y4B5     | Calnexin                                                     | Biological Replicate 2 Only | 1                           |
| P60709     | Calnexin                                                     | Biological Replicate 2 Only | 7                           |
| Q5JU67     | cAMP-regulated phosphoprotein 19                             | Biological Replicate 2 Only | 1                           |
| Q15027     | Cancer-related regulator of actin dynamics                   | Biological Replicate 2 Only | 1                           |
| Q12797     | Carbohydrate sulfotransferase 15                             | Biological Replicate 2 Only | 1                           |
| Q6UY18     | Cardiomyopathy-associated protein 5                          | Biological Replicate 2 Only | 1                           |
| E9PRY8     | CD63 antigen                                                 | Biological Replicate 2 Only | 2                           |
| P05198     | CD99 antigen                                                 | Biological Replicate 2 Only | 2                           |
| Q07812-5   | Chromodomain-helicase-DNA-binding protein 4                  | Biological Replicate 2 Only | 1                           |
| Q99623     | Cilia- and flagella-associated protein 157                   | Biological Replicate 2 Only | 1                           |
| A0A1W2PR46 | Coatomer subunit beta                                        | Biological Replicate 2 Only | 1                           |
| P46777     | Coatomer subunit delta                                       | Biological Replicate 2 Only | 1                           |
| Q9P2D8-3   | Cofilin 2                                                    | Biological Replicate 2 Only | 1                           |
| Q16891-2   | Coiled-coil domain-containing protein 63                     | Biological Replicate 2 Only | 1                           |
| A3RDR6     | Collagen alpha-4 chain                                       | Biological Replicate 2 Only | 1                           |
| P42677     | Copine-1                                                     | Biological Replicate 2 Only | 1                           |
| Q12888-2   | Coronin                                                      | Biological Replicate 2 Only | 1                           |
| H0YL11     | CST complex subunit STN1                                     | Biological Replicate 2 Only | 1                           |
| J3KPF0     | Cytochrome c oxidase subunit 5B                              | Biological Replicate 2 Only | 1                           |
| B4DYP4     | Cytosolic carboxypeptidase 1                                 | Biological Replicate 2 Only | 1                           |
| Q8N3K9     | DC30                                                         | Biological Replicate 2 Only | 1                           |
| A0A087WYV2 | DDB1- and CUL4-associated factor 15                          | Biological Replicate 2 Only | 1                           |
| Q6ECI4     | Diacylglycerol kinase eta                                    | Biological Replicate 2 Only | 1                           |
| D3DV26     | Dihydropyrimidinase-related protein 3                        | Biological Replicate 2 Only | 1                           |
| O95450     | Dihydropyrimidine dehydrogenase                              | Biological Replicate 2 Only | 1                           |
| A8K8X0     | DNA replication ATP-dependent helicase/nuclease DNA2         | Biological Replicate 2 Only | 1                           |
| O43156     | DNA topoisomerase 2-alpha                                    | Biological Replicate 2 Only | 1                           |
| P60660-2   | DUF4205 domain-containing protein                            | Biological Replicate 2 Only | 1                           |
| E9PQK5     | Dynamin-like 120 kDa protein                                 | Biological Replicate 2 Only | 1                           |
| H0YBH6     | E3 ubiquitin-protein ligase HERC2                            | Biological Replicate 2 Only | 1                           |
| Q6Q759     | E3 ubiquitin-protein ligase RNF213                           | Biological Replicate 2 Only | 1                           |
| Q96M93     | eIF-2-alpha kinase GCN2                                      | Biological Replicate 2 Only | 1                           |
| Q6LES2     | eIF4G1 variant protein                                       | Biological Replicate 2 Only | 1                           |
| P63220     | Elongation factor 1-delta                                    | Biological Replicate 2 Only | 3                           |
| P27824-2   | Endoplasmic reticulum resident protein 29                    | Biological Replicate 2 Only | 2                           |
| P49321     | Epididymis secretory protein Li 310                          | Biological Replicate 2 Only | 1                           |
| Q14847     | Epididymis secretory sperm binding protein                   | Biological Replicate 2 Only | 1                           |
| Q15149-3   | Epididymis secretory sperm binding protein                   | Biological Replicate 2 Only | 2                           |
| P84550-2   | Epididymis secretory sperm binding protein )                 | Biological Replicate 2 Only | 1                           |
| O75143-5   | Establishment of cohesion 1 homolog 1                        | Biological Replicate 2 Only | 1                           |
| P23246     | Eukaryotic translation initiation factor 2 subunit 1         | Biological Replicate 2 Only | 2                           |
| M0R0R2     | Eukaryotic translation initiation factor 4H                  | Biological Replicate 2 Only | 1                           |
| Q8IX03-2   | FYVE and coiled-coil domain-containing protein 1             | Biological Replicate 2 Only | 1                           |
| O75382     | Girdin                                                       | Biological Replicate 2 Only | 1                           |
| P30040     | Glial fibrillary acidic protein                              | Biological Replicate 2 Only | 1                           |
| O95714     | Golgin subfamily A member 4                                  | Biological Replicate 2 Only | 1                           |
| Q4LE58     | Guanine nucleotide binding protein                           | Biological Replicate 2 Only | 1                           |
| V9HWB8     | Guanine nucleotide-binding protein G subunit alpha-1         | Biological Replicate 2 Only | 2                           |
| Q7LFX5     | H.sapiens ras-related Hrab2 protein                          | Biological Replicate 2 Only | 1                           |
| Q2QD09     | Heat shock protein 94c                                       | Biological Replicate 2 Only | 1                           |
| P08195-4   | HECT                                                         | Biological Replicate 2 Only | 1                           |
| Q6ZU35     | Hemicentin-2                                                 | Biological Replicate 2 Only | 1                           |
| P36578     | Heterogeneous nuclear ribonucleoprotein D                    | Biological Replicate 2 Only | 1                           |
| Q8WUM4-2   | Heterogeneous nuclear ribonucleoprotein K transcript variant | Biological Replicate 2 Only | 3                           |
| H0YHG0     | Heterogeneous nuclear ribonucleoprotein R                    | Biological Replicate 2 Only | 1                           |
| Q13177     | Histocompatibility 13 isoform 1                              | Biological Replicate 2 Only | 1                           |
| Q01844-5   | Histone H4                                                   | Biological Replicate 2 Only | 1                           |
| Q8TCU6     | HSPC269                                                      | Biological Replicate 2 Only | 1                           |
| P35579-2   | Ig-like domain-containing protein                            | Biological Replicate 2 Only | 6                           |
| B2R761     | Integrator complex subunit 10                                | Biological Replicate 2 Only | 1                           |
| Q9UMS4     | IQ and AAA domain-containing protein 1-like                  | Biological Replicate 2 Only | 1                           |
| B3KN49     | Isocitrate dehydrogenase                                     | Biological Replicate 2 Only | 1                           |
| B2R4R0     | Jupiter microtubule associated homolog 2                     | Biological Replicate 2 Only | 2                           |
| Q15056     | Keratin                                                      | Biological Replicate 2 Only | 1                           |
| Q9H910-3   | Keratin                                                      | Biological Replicate 2 Only | 1                           |
| Q86SQ4-3   | Kinesin-like protein                                         | Biological Replicate 2 Only | 1                           |

| Uniprot ID | Protein Name                                                                | Biological Replicate        | Number of Modified Peptides |
|------------|-----------------------------------------------------------------------------|-----------------------------|-----------------------------|
| S4R369     | Kininogen 1                                                                 | Biological Replicate 2 Only | 1                           |
| B2R8Z8     | Large proline-rich protein BAG6                                             | Biological Replicate 2 Only | 1                           |
| Q14197     | Leucine-rich repeat a domain-containing nogo receptor-interacting protein 4 | Biological Replicate 2 Only | 1                           |
| P26038     | LIM and SH3 domain protein 1                                                | Biological Replicate 2 Only | 3                           |
| P46379-3   | Lysine-tRNA ligase                                                          | Biological Replicate 2 Only | 1                           |
| Q13564-4   | Macrophage-capping protein                                                  | Biological Replicate 2 Only | 1                           |
| D6RIA3     | Maltase-glucoamylase                                                        | Biological Replicate 2 Only | 1                           |
| P02549     | Mannosyl-oligosaccharide glucosidase                                        | Biological Replicate 2 Only | 1                           |
| Q562L9     | MAP4 protein                                                                | Biological Replicate 2 Only | 2                           |
| H3BMD8     | Methylthioribose-1-phosphate isomerase                                      | Biological Replicate 2 Only | 1                           |
| Q9H4A3-7   | MHC class I antigen                                                         | Biological Replicate 2 Only | 1                           |
| Q8TBD0     | MICOS complex subunit MIC60                                                 | Biological Replicate 2 Only | 1                           |
| Q9H2M6     | Microtubule cross-linking factor 1                                          | Biological Replicate 2 Only | 1                           |
| P61981     | Microtubule-actin cross-linking factor 1                                    | Biological Replicate 2 Only | 2                           |
| Q9HBR0     | Mitogen-activated protein kinase                                            | Biological Replicate 2 Only | 1                           |
| K7EJH8     | Moesin                                                                      | Biological Replicate 2 Only | 1                           |
| Q8N0S2     | mRNA decapping enzyme variant                                               | Biological Replicate 2 Only | 1                           |
| B4DS05     | Myosin-9                                                                    | Biological Replicate 2 Only | 1                           |
| P05387     | Myotrophin                                                                  | Biological Replicate 2 Only | 1                           |
| Q53G42     | Na/H exchange regulatory cofactor NHE-RF1 /H exchanger)                     | Biological Replicate 2 Only | 1                           |
| B4DH89     | NADH dehydrogenase flavoprotein 3                                           | Biological Replicate 2 Only | 1                           |
| Q5T3Y7     | Nebulin-related-anchoring protein                                           | Biological Replicate 2 Only | 1                           |
| Q1HBJ4     | NEDD8-activating enzyme E1 regulatory subunit                               | Biological Replicate 2 Only | 1                           |
| Q9BV20     | Neural cell adhesion molecule 1                                             | Biological Replicate 2 Only | 1                           |
| Q6ICQ4     | Neural cell adhesion molecule 1                                             | Biological Replicate 2 Only | 1                           |
| Q9BTW9-4   | Ninein-like protein                                                         | Biological Replicate 2 Only | 1                           |
| Q59HG2     | NOD2                                                                        | Biological Replicate 2 Only | 1                           |
| P06733     | Non-muscle myosin heavy chain 9                                             | Biological Replicate 2 Only | 1                           |
| A0A0S2Z500 | NUAK family SNF1-like kinase 1                                              | Biological Replicate 2 Only | 1                           |
| Q53G74     | Nuclear autoantigenic sperm protein                                         | Biological Replicate 2 Only | 1                           |
| Q6FG99     | Nucleolin                                                                   | Biological Replicate 2 Only | 1                           |
| P63096     | NUMA1 variant protein                                                       | Biological Replicate 2 Only | 1                           |
| Q5QJ38     | Optineurin isoform 1                                                        | Biological Replicate 2 Only | 1                           |
| H0Y2S1     | p37 AUF1                                                                    | Biological Replicate 2 Only | 1                           |
| A0A024R0H1 | Peptidyl-prolyl cis-trans isomerase G                                       | Biological Replicate 2 Only | 1                           |
| P06727     | Peptidyl-tRNA hydrolase ICT1                                                | Biological Replicate 2 Only | 1                           |
| P57721     | Peroxiredoxin-1                                                             | Biological Replicate 2 Only | 1                           |
| Q7Z595     | Phosphatidylinositol 3                                                      | Biological Replicate 2 Only | 1                           |
| Q86V38     | Phosphodiesterase                                                           | Biological Replicate 2 Only | 1                           |
| Q9P2K8     | Phosphoglycerate mutase                                                     | Biological Replicate 2 Only | 1                           |
| Q06830     | Phosphoglycerate mutase                                                     | Biological Replicate 2 Only | 1                           |
| Q13724     | Phospholipid phosphatase-related protein type 3                             | Biological Replicate 2 Only | 1                           |
| Q9Y2G0     | Photoreceptor cilium actin regulator                                        | Biological Replicate 2 Only | 1                           |
| A0A024R0R4 | Plastin-3                                                                   | Biological Replicate 2 Only | 1                           |
| P62081     | Plectin                                                                     | Biological Replicate 2 Only | 1                           |
| A6NEY3     | Poly polymerase                                                             | Biological Replicate 2 Only | 1                           |
| Q9P0B2     | Poly-binding protein 3                                                      | Biological Replicate 2 Only | 1                           |
| Q8NBX0     | POU domain protein                                                          | Biological Replicate 2 Only | 1                           |
| O43390     | Pre-mRNA-processing factor 19                                               | Biological Replicate 2 Only | 1                           |
| BOYIW6     | Probable ATP-dependent RNA helicase DDX6                                    | Biological Replicate 2 Only | 1                           |
| B6D4Y1     | Probable E3 ubiquitin-protein ligase HECTD4                                 | Biological Replicate 2 Only | 1                           |
| Q13129     | Probable helicase senataxin                                                 | Biological Replicate 2 Only | 1                           |
| Q1ZYQ1     | Probable phosphoglycerate mutase 4                                          | Biological Replicate 2 Only | 2                           |
| P08962     | Profilin-1                                                                  | Biological Replicate 2 Only | 1                           |
| H0YAH0     | Progesterone-induced-blocking factor 1                                      | Biological Replicate 2 Only | 1                           |
| A0A024R4A0 | Programmed cell death 6-interacting protein                                 | Biological Replicate 2 Only | 2                           |
| A0A0S2Z410 | Prohibitin-2                                                                | Biological Replicate 2 Only | 1                           |
| A0A024R9W5 | Proteasome endopeptidase complex                                            | Biological Replicate 2 Only | 1                           |
| P53618     | Proteasome subunit alpha type-3                                             | Biological Replicate 2 Only | 1                           |
| Q6IAL9     | Protein EFR3 homolog B                                                      | Biological Replicate 2 Only | 1                           |
| Q5T6X2     | Protein Hook homolog 3                                                      | Biological Replicate 2 Only | 1                           |
| Q6NXE6     | Protein KIBRA                                                               | Biological Replicate 2 Only | 1                           |
| O43776     | Protein PML                                                                 | Biological Replicate 2 Only | 1                           |
| Q969G3     | Protein unc-79 homolog                                                      | Biological Replicate 2 Only | 1                           |
| A8K725     | Protocadherin-7                                                             | Biological Replicate 2 Only | 1                           |
| P56181     | PTTG1 protein                                                               | Biological Replicate 2 Only | 1                           |
| Q9NVP8     | Putative golgin subfamily A member 6-like protein 3                         | Biological Replicate 2 Only | 1                           |
| A0A024R0Q3 | Putative GTP-binding protein 6                                              | Biological Replicate 2 Only | 1                           |
| P67936-2   | Putative sodium-coupled neutral amino acid transporter 10                   | Biological Replicate 2 Only | 1                           |

| Uniprot ID | Protein Name                                                                                  | Biological Replicate        | Number of Modified Peptides |
|------------|-----------------------------------------------------------------------------------------------|-----------------------------|-----------------------------|
| P29590-2   | Putative uncharacterized protein BVES-AS1                                                     | Biological Replicate 2 Only | 1                           |
| A0A0A0MR05 | Pyridoxal kinase                                                                              | Biological Replicate 2 Only | 1                           |
| V9HW01     | Pyruvate kinase                                                                               | Biological Replicate 2 Only | 1                           |
| O60285     | Pyruvate kinase                                                                               | Biological Replicate 2 Only | 1                           |
| P25788     | Rab GDP dissociation inhibitor                                                                | Biological Replicate 2 Only | 1                           |
| Q99996-6   | RANBP2-like and GRIP domain-containing protein 2                                              | Biological Replicate 2 Only | 1                           |
| A8K7Z3     | Ras-related protein R-Ras2                                                                    | Biological Replicate 2 Only | 1                           |
| B4E388     | Retinal dehydrogenase 2                                                                       | Biological Replicate 2 Only | 1                           |
| P13797     | Rhodopsin kinase GRK7                                                                         | Biological Replicate 2 Only | 1                           |
| P09493-7   | Ribosomal protein L4 variant                                                                  | Biological Replicate 2 Only | 1                           |
| A0A024R084 | RNA-binding protein EWS                                                                       | Biological Replicate 2 Only | 1                           |
| A4D1U3     | RPLP1 protein                                                                                 | Biological Replicate 2 Only | 1                           |
| Q9UK80     | RPLP1 protein                                                                                 | Biological Replicate 2 Only | 1                           |
| B0QZ18     | S100 calcium binding protein A10                                                              | Biological Replicate 2 Only | 1                           |
| Q3V6T2     | Saccharopine dehydrogenase-like oxidoreductase                                                | Biological Replicate 2 Only | 1                           |
| B2R4P2     | Serine/threonine-protein kinase PAK 2                                                         | Biological Replicate 2 Only | 2                           |
| Q8NDA2     | Serine/threonine-protein kinase WNK1                                                          | Biological Replicate 2 Only | 1                           |
| Q86XP1     | Sialic acid-binding Ig-like lectin 12                                                         | Biological Replicate 2 Only | 1                           |
| B4DR52     | Single-stranded DNA binding protein 1                                                         | Biological Replicate 2 Only | 1                           |
| O60313-10  | SKI family transcriptional corepressor 1                                                      | Biological Replicate 2 Only | 1                           |
| A0A0S2Z3X8 | Small nuclear ribonucleoprotein E                                                             | Biological Replicate 2 Only | 1                           |
| Q8WTQ7     | Solute carrier family 16                                                                      | Biological Replicate 2 Only | 1                           |
| I3L457     | Spectrin alpha chain                                                                          | Biological Replicate 2 Only | 1                           |
| Q12771     | Sperm-associated antigen 17                                                                   | Biological Replicate 2 Only | 1                           |
| B3KT70     | Splicing factor                                                                               | Biological Replicate 2 Only | 1                           |
| P27482     | Staufen isoform b variant                                                                     | Biological Replicate 2 Only | 1                           |
| Q05682     | Steroidogenic acute regulatory protein                                                        | Biological Replicate 2 Only | 1                           |
| P58546     | Stromal cell derived factor 4                                                                 | Biological Replicate 2 Only | 1                           |
| A0A1W2PNU4 | Sulfotransferase                                                                              | Biological Replicate 2 Only | 1                           |
| A8K6R5     | Sulfotransferase                                                                              | Biological Replicate 2 Only | 1                           |
| A0A024R8M0 | SUMO-1 activating enzyme subunit 1                                                            | Biological Replicate 2 Only | 1                           |
| Q86VF7-2   | SWI/SNF-related matrix-associated actin-dependent regulator of chromatin subfamily E member 1 | Biological Replicate 2 Only | 1                           |
| A2A3R6     | Synaptonemal complex central element protein 1                                                | Biological Replicate 2 Only | 1                           |
| Q13427     | Target of rapamycin complex subunit LST8                                                      | Biological Replicate 2 Only | 1                           |
| P22105-4   | TEK tyrosine kinase variant                                                                   | Biological Replicate 2 Only | 1                           |
| B7ZKJ5     | TELO2-interacting protein 1 homolog                                                           | Biological Replicate 2 Only | 1                           |
| O43451     | Tenascin-X                                                                                    | Biological Replicate 2 Only | 1                           |
| Q66K64     | Terminal nucleotidyltransferase 4A                                                            | Biological Replicate 2 Only | 1                           |
| Q96PQ1     | Testis-specific serine kinase substrate                                                       | Biological Replicate 2 Only | 1                           |
| Q4LE64     | TP53-binding protein 1                                                                        | Biological Replicate 2 Only | 1                           |
| A0A087WV75 | TPM1 protein variant                                                                          | Biological Replicate 2 Only | 1                           |
| Q8NDG6     | Transmembrane 7 superfamily member 3                                                          | Biological Replicate 2 Only | 1                           |
| A0A087WWD4 | Trichohyalin-like protein 1                                                                   | Biological Replicate 2 Only | 1                           |
| P14550     | Triosephosphate isomerase                                                                     | Biological Replicate 2 Only | 1                           |
| A0A0X1KG68 | Tripartite motif-containing protein 3                                                         | Biological Replicate 2 Only | 1                           |
| P67936     | Tropomyosin 1                                                                                 | Biological Replicate 2 Only | 2                           |
| O94788     | Tropomyosin alpha-1 chain                                                                     | Biological Replicate 2 Only | 1                           |
| Q6FHK8     | Tropomyosin alpha-4 chain                                                                     | Biological Replicate 2 Only | 1                           |
| P13645     | Tropomyosin beta chain                                                                        | Biological Replicate 2 Only | 1                           |
| Q6NX68     | Tubulin alpha-1A chain                                                                        | Biological Replicate 2 Only | 2                           |
| Q8IX07     | Tubulin-specific chaperone D                                                                  | Biological Replicate 2 Only | 1                           |
| A6NGG8     | Tyrosine-protein kinase receptor                                                              | Biological Replicate 2 Only | 1                           |
| A0A024R3D8 | Tyrosine-protein phosphatase non-receptor type                                                | Biological Replicate 2 Only | 1                           |
| Q9BQS8-4   | Ubiquitin carboxyl-terminal hydrolase 21                                                      | Biological Replicate 2 Only | 1                           |
| Q8NA47     | Ubiquitin thioesterase atuln                                                                  | Biological Replicate 2 Only | 1                           |
| Q15046-2   | Uncharacterized protein                                                                       | Biological Replicate 2 Only | 1                           |
| A8K4Z6     | Uncharacterized protein C4orf54                                                               | Biological Replicate 2 Only | 1                           |
| Q58F21-3   | Uncharacterized protein C8orf86                                                               | Biological Replicate 2 Only | 1                           |
| Q5EC54     | Vacuolar protein sorting-associated protein 37B                                               | Biological Replicate 2 Only | 3                           |
| B4DLP0     | Vacuolar-sorting protein SNF8                                                                 | Biological Replicate 2 Only | 1                           |
| A0A0S2Z5V7 | XIAP-associated factor 1                                                                      | Biological Replicate 2 Only | 1                           |
| A8K3M3     | ZFX protein                                                                                   | Biological Replicate 2 Only | 1                           |
| O14745     | Zinc finger protein 224                                                                       | Biological Replicate 2 Only | 1                           |
| Q12882     | Zinc finger protein 470                                                                       | Biological Replicate 2 Only | 1                           |
| P53420     | Zinc finger protein 831                                                                       | Biological Replicate 2 Only | 2                           |
| O00764     | Zinc finger protein Rlf                                                                       | Biological Replicate 2 Only | 1                           |
| Q6T4P5-3   | Zinc finger protein ZFPM1                                                                     | Biological Replicate 2 Only | 1                           |
| J3QRS3     | 14-3-3 protein beta/alpha                                                                     | Both Biological Replicates  | 2                           |
| Q9Y3C6     | 26S proteasome regulatory subunit 7                                                           | Both Biological Replicates  | 2                           |



| Uniprot ID | Protein Name                                                    | Biological Replicate       | Number of Modified Peptides |
|------------|-----------------------------------------------------------------|----------------------------|-----------------------------|
| A0A0S2Z3L0 | ACLY variant protein                                            | Both Biological Replicates | 2                           |
| K7ELW9     | ACTA2 protein                                                   | Both Biological Replicates | 2                           |
| B2RD79     | Actinin alpha 4 isoform 1                                       | Both Biological Replicates | 2                           |
| Q562V5     | Actin-like protein                                              | Both Biological Replicates | 3                           |
| Q9BUF5     | Actin-like protein                                              | Both Biological Replicates | 5                           |
| P68366     | Actin-like protein                                              | Both Biological Replicates | 2                           |
| O75396     | Actin-related protein 2                                         | Both Biological Replicates | 2                           |
| A0A0G2JIW1 | Aldehyde dehydrogenase 1 family                                 | Both Biological Replicates | 9                           |
| B1PS43     | Alternative protein POTEM                                       | Both Biological Replicates | 3                           |
| Q8NBS9     | Annexin A1                                                      | Both Biological Replicates | 2                           |
| P07355-2   | Annexin A2                                                      | Both Biological Replicates | 11                          |
| Q9UMX0     | ATP synthase subunit beta                                       | Both Biological Replicates | 4                           |
| P54709     | ATPase Ca++ transporting cardiac muscle slow twitch 2 isoform 1 | Both Biological Replicates | 2                           |
| P42224     | ATPase                                                          | Both Biological Replicates | 4                           |
| Q9UE89     | Beta-actin                                                      | Both Biological Replicates | 2                           |
| P06753-6   | Beta-actin-like protein 2                                       | Both Biological Replicates | 2                           |
| P61160     | Bifunctional glutamate/proline-tRNA ligase                      | Both Biological Replicates | 3                           |
| P80723     | Brain acid soluble protein 1                                    | Both Biological Replicates | 6                           |
| Q4LE36     | Calcyclin-binding protein                                       | Both Biological Replicates | 7                           |
| E7EMB3     | Calmodulin-2                                                    | Both Biological Replicates | 2                           |
| D0PNI1     | Calpain small subunit 1                                         | Both Biological Replicates | 3                           |
| B2R7U4     | Calpastatin                                                     | Both Biological Replicates | 3                           |
| B4DJQ5     | Calponin-3                                                      | Both Biological Replicates | 4                           |
| V9HW88     | Calreticulin                                                    | Both Biological Replicates | 5                           |
| P61978-3   | Calumenin                                                       | Both Biological Replicates | 5                           |
| A0A024R4K3 | Caprin-1                                                        | Both Biological Replicates | 3                           |
| Q96PH1     | Cathepsin D                                                     | Both Biological Replicates | 2                           |
| A0A024RC65 | CDC37 cell division cycle 37 homolog                            | Both Biological Replicates | 3                           |
| P35270     | Centrin-2                                                       | Both Biological Replicates | 2                           |
| A0A087WSV8 | Chloride intracellular channel protein                          | Both Biological Replicates | 2                           |
| P10599     | Cilia- and flagella-associated protein 47                       | Both Biological Replicates | 3                           |
| Q9UBS4     | Cingulin                                                        | Both Biological Replicates | 2                           |
| P18206     | Clathrin heavy chain                                            | Both Biological Replicates | 6                           |
| Q00839     | Cofilin-1                                                       | Both Biological Replicates | 3                           |
| P31946     | Coxsackievirus and adenovirus receptor                          | Both Biological Replicates | 4                           |
| Q53Y06     | Deleted.                                                        | Both Biological Replicates | 3                           |
| Q95551-2   | DnaJ homolog subfamily B member 11                              | Both Biological Replicates | 2                           |
| Q562R1     | Drebrin                                                         | Both Biological Replicates | 5                           |
| P35527     | Electron-transfer-flavoprotein alpha polypeptide isoform 1      | Both Biological Replicates | 5                           |
| P13639     | Elongation factor 2                                             | Both Biological Replicates | 5                           |
| H6VRG1     | Epididymis luminal protein 33                                   | Both Biological Replicates | 2                           |
| V9HWP2     | Epididymis luminal protein 35                                   | Both Biological Replicates | 7                           |
| Q13310-3   | Epididymis luminal protein 4                                    | Both Biological Replicates | 2                           |
| V9HW37     | Epididymis secretory protein Li 69                              | Both Biological Replicates | 2                           |
| A0A024R3X4 | Epididymis secretory sperm binding protein                      | Both Biological Replicates | 6                           |
| V9HWB4     | Epididymis secretory sperm binding protein Li 89n               | Both Biological Replicates | 16                          |
| E5KNY5     | Fatty acid synthase                                             | Both Biological Replicates | 4                           |
| P02545     | Filamin-A                                                       | Both Biological Replicates | 3                           |
| Q14315     | Filamin-C                                                       | Both Biological Replicates | 6                           |
| P09382     | Galectin-1                                                      | Both Biological Replicates | 2                           |
| P04406     | Glyceraldehyde-3-phosphate dehydrogenase                        | Both Biological Replicates | 6                           |
| Q9HB71     | Glypican-4                                                      | Both Biological Replicates | 2                           |
| P0CG39     | HCG1991735                                                      | Both Biological Replicates | 2                           |
| P55072     | Heat shock 70 kDa protein 1B                                    | Both Biological Replicates | 7                           |
| J3KQA9     | Heat shock 70 kDa protein 1-like                                | Both Biological Replicates | 2                           |
| P68371     | Heat shock cognate 71 kDa protein                               | Both Biological Replicates | 13                          |
| A0A024RD80 | Heat shock protein 90kDa alpha                                  | Both Biological Replicates | 2                           |
| P04792     | Heat shock protein beta-1                                       | Both Biological Replicates | 6                           |
| A0A140VJZ4 | Heat shock protein HSP 90-alpha                                 | Both Biological Replicates | 3                           |
| B4DH02     | Heme oxygenase                                                  | Both Biological Replicates | 6                           |
| P28074     | Heparan-alpha-glucosaminide N-acetyltransferase                 | Both Biological Replicates | 2                           |
| P60174     | Heterogeneous nuclear ribonucleoprotein K                       | Both Biological Replicates | 2                           |
| Q15084-2   | Heterogeneous nuclear ribonucleoprotein M                       | Both Biological Replicates | 2                           |
| V9HW31     | Heterogeneous nuclear ribonucleoprotein U                       | Both Biological Replicates | 5                           |
| P22626     | Heterogeneous nuclear ribonucleoproteins A2/B1                  | Both Biological Replicates | 2                           |
| P25786-2   | High-mobility group box 1                                       | Both Biological Replicates | 2                           |
| A8K3R2     | Histone chaperone ASF1B                                         | Both Biological Replicates | 2                           |
| B4DVU9     | Histone H2A type 2-B                                            | Both Biological Replicates | 5                           |
| P30041     | Hypoxia up-regulated protein 1                                  | Both Biological Replicates | 3                           |

| Uniprot ID | Protein Name                                                          | Biological Replicate       | Number of Modified Peptides |
|------------|-----------------------------------------------------------------------|----------------------------|-----------------------------|
| P49327     | Integrin beta-1                                                       | Both Biological Replicates | 4                           |
| A0A024R5H8 | Keratin 1                                                             | Both Biological Replicates | 2                           |
| P05556     | Keratin                                                               | Both Biological Replicates | 2                           |
| P78310     | Keratin                                                               | Both Biological Replicates | 2                           |
| B2RAH5     | Leucine-rich PPR-motif containing                                     | Both Biological Replicates | 2                           |
| P41208     | Malate dehydrogenase                                                  | Both Biological Replicates | 4                           |
| P04350     | Microtubule-associated protein                                        | Both Biological Replicates | 7                           |
| P50990     | Microtubule-associated protein 1B                                     | Both Biological Replicates | 4                           |
| A0A140VKE7 | Microtubule-associated tumor suppressor candidate 2                   | Both Biological Replicates | 2                           |
| Q9NS69     | Mitochondrial import receptor subunit TOM22 homolog                   | Both Biological Replicates | 2                           |
| E9PK54     | Myosin heavy chain 11 smooth muscle isoform                           | Both Biological Replicates | 4                           |
| J3KN67     | Myosin regulatory light chain 12A                                     | Both Biological Replicates | 4                           |
| Q9BT73     | Myosin regulatory light chain MRCL3 variant                           | Both Biological Replicates | 2                           |
| Q562Z4     | Myosin                                                                | Both Biological Replicates | 2                           |
| P35580-4   | Myosin-10                                                             | Both Biological Replicates | 2                           |
| P34931     | Myosin-14                                                             | Both Biological Replicates | 4                           |
| P07900-2   | NADPH oxidase 5                                                       | Both Biological Replicates | 3                           |
| E9PK25     | Neuroblast differentiation-associated protein AHNAK                   | Both Biological Replicates | 3                           |
| P35998     | Nuclear transport factor 2                                            | Both Biological Replicates | 2                           |
| P06748     | Nucleophosmin                                                         | Both Biological Replicates | 2                           |
| A0A024RBB7 | Nucleosome assembly protein 1-like 1                                  | Both Biological Replicates | 3                           |
| Q9UMX0-2   | Nucleosome assembly protein 1-like 1                                  | Both Biological Replicates | 4                           |
| A8K486     | Peptidyl-prolyl cis-trans isomerase                                   | Both Biological Replicates | 3                           |
| P31948-2   | Peptidyl-prolyl cis-trans isomerase FKBP10                            | Both Biological Replicates | 2                           |
| A0A0C4DGG5 | Peptidyl-prolyl cis-trans isomerase-like 1                            | Both Biological Replicates | 3                           |
| O43852-4   | Peroxiredoxin-6                                                       | Both Biological Replicates | 4                           |
| P46013     | Phytanoyl-CoA 2-hydroxylase interacting protein-like                  | Both Biological Replicates | 3                           |
| A0A024RBE6 | Polyadenylate-binding protein 1 -binding protein 1)                   | Both Biological Replicates | 2                           |
| Q15365     | Polyadenylate-binding protein 4 -binding protein 4) -binding protein) | Both Biological Replicates | 2                           |
| P11441     | Poly-binding protein 1                                                | Both Biological Replicates | 2                           |
| Q15366-3   | Poly-binding protein 2                                                | Both Biological Replicates | 2                           |
| B4DJ30     | POTE ankyrin domain family member J                                   | Both Biological Replicates | 2                           |
| P52272     | Prelamin-A/C                                                          | Both Biological Replicates | 2                           |
| Q9Y4L1     | Proliferation marker protein Ki-67                                    | Both Biological Replicates | 4                           |
| Q13707     | Proteasome assembly chaperone 3                                       | Both Biological Replicates | 9                           |
| Q14444     | Proteasome subunit alpha type-1                                       | Both Biological Replicates | 2                           |
| B5MCY1     | Proteasome subunit beta type-5                                        | Both Biological Replicates | 2                           |
| A0A024R8S5 | Protein disulfide-isomerase                                           | Both Biological Replicates | 8                           |
| A0A090N8Y2 | Protein disulfide-isomerase A4                                        | Both Biological Replicates | 5                           |
| A0A087WVQ6 | Protein disulfide-isomerase A6                                        | Both Biological Replicates | 2                           |
| Q6FIG4     | Protein phosphatase 1 regulatory subunit                              | Both Biological Replicates | 3                           |
| A0A024R7B7 | Pyruvate dehydrogenase E1 component subunit beta                      | Both Biological Replicates | 2                           |
| E7EVA0     | RAB1B protein                                                         | Both Biological Replicates | 5                           |
| A0A0S2Z3L2 | RAB6A                                                                 | Both Biological Replicates | 2                           |
| A0A1S5UZ07 | Ras-related protein Rab-5C                                            | Both Biological Replicates | 5                           |
| A0A024RAM4 | RBBP7 protein                                                         | Both Biological Replicates | 3                           |
| Q9NR12     | Ribosome biogenesis protein BOP1                                      | Both Biological Replicates | 2                           |
| A0A140VJM0 | Sepiapterin reductase                                                 | Both Biological Replicates | 2                           |
| P21333     | Signal transducer and activator of transcription 1-alpha/beta         | Both Biological Replicates | 9                           |
| O75487     | Signal transducer and activator of transcription 3                    | Both Biological Replicates | 2                           |
| Q15417     | Small acidic protein                                                  | Both Biological Replicates | 5                           |
| A0A024RDR0 | Small nuclear ribonucleoprotein F                                     | Both Biological Replicates | 2                           |
| A0A0S2Z3G9 | Sodium/potassium-transporting ATPase subunit beta-3                   | Both Biological Replicates | 3                           |
| P40763     | Spectrin beta chain                                                   | Both Biological Replicates | 2                           |
| B9EK46     | Splicing factor 3B subunit 2                                          | Both Biological Replicates | 2                           |
| P38646     | Stress-70 protein                                                     | Both Biological Replicates | 3                           |
| Q15819     | Stress-induced-phosphoprotein 1                                       | Both Biological Replicates | 2                           |
| P20810-6   | Talin-1                                                               | Both Biological Replicates | 3                           |
| P07814     | T-complex protein 1 subunit theta                                     | Both Biological Replicates | 4                           |
| V9HW83     | Testicular tissue protein Li 96                                       | Both Biological Replicates | 3                           |
| Q13435     | Testis tissue sperm-binding protein Li 64n                            | Both Biological Replicates | 3                           |
| P07339     | Thioredoxin                                                           | Both Biological Replicates | 2                           |
| V9HW22     | Thioredoxin domain-containing protein 5                               | Both Biological Replicates | 6                           |
| P37802-2   | TMSB4X protein                                                        | Both Biological Replicates | 5                           |
| B2R8R5     | Transgelin-2                                                          | Both Biological Replicates | 4                           |
| P05787-2   | Transitional endoplasmic reticulum ATPase -ATPase p97 subunit)        | Both Biological Replicates | 10                          |
| F5H5D3     | Triosephosphate isomerase                                             | Both Biological Replicates | 3                           |
| Q15836     | Tropomyosin alpha-3 chain                                             | Both Biological Replicates | 2                           |
| O43852-3   | Tropomyosin alpha-3 chain                                             | Both Biological Replicates | 4                           |

| Uniprot ID | Protein Name                               | Biological Replicate       | Number of Modified Peptides |
|------------|--------------------------------------------|----------------------------|-----------------------------|
| Q68CP4     | Tubulin alpha chain                        | Both Biological Replicates | 2                           |
| B3KUD3     | Tubulin alpha-4A chain                     | Both Biological Replicates | 8                           |
| Q13885     | Tubulin beta-2A chain                      | Both Biological Replicates | 13                          |
| Q13509     | Tubulin beta-3 chain                       | Both Biological Replicates | 5                           |
| P13010     | Tubulin beta-4A chain                      | Both Biological Replicates | 2                           |
| P09493-8   | Tubulin beta-4B chain                      | Both Biological Replicates | 2                           |
| Q9UHD9     | Tubulin beta-6 chain                       | Both Biological Replicates | 2                           |
| A0A024QZK4 | Tudor domain-containing protein 15         | Both Biological Replicates | 2                           |
| P51148-2   | Tumor protein D54                          | Both Biological Replicates | 2                           |
| B2R7P8     | Tyrosyl-DNA phosphodiesterase 2            | Both Biological Replicates | 2                           |
| Q7Z406-2   | Ubiquitin-1                                | Both Biological Replicates | 2                           |
| Q53HL1     | Ubiquitin-2                                | Both Biological Replicates | 4                           |
| A0A024R6Y2 | Ubiquitin carboxyl-terminal hydrolase      | Both Biological Replicates | 2                           |
| P04083     | Ubiquitin carboxyl-terminal hydrolase      | Both Biological Replicates | 2                           |
| B2R6J2     | Ubiquitin-conjugating enzyme E2 variant 2  | Both Biological Replicates | 2                           |
| P11177     | Ubiquitin-like protein 4A                  | Both Biological Replicates | 3                           |
| A8K7F6     | Vesicle-associated membrane protein 3      | Both Biological Replicates | 3                           |
| Q96AY3     | Vesicle-trafficking protein SEC22b         | Both Biological Replicates | 3                           |
| P08670     | Vimentin                                   | Both Biological Replicates | 13                          |
| Q0P5N8     | Vinculin                                   | Both Biological Replicates | 2                           |
| O00193     | X-ray repair cross-complementing protein 5 | Both Biological Replicates | 2                           |
| P67809     | Y-box-binding protein 1                    | Both Biological Replicates | 3                           |

Table S2. IC-FPOP oxidatively modified proteins in HEK Cells.

| Uniprot ID | Protein Name                                                         | Biological Replicate        | Number of Modified Peptides |
|------------|----------------------------------------------------------------------|-----------------------------|-----------------------------|
| Q9NRX4     | 14 kDa phosphohistidine phosphatase                                  | Biological Replicate 1 Only | 1                           |
| P31946     | 14-3-3 protein beta/alpha                                            | Biological Replicate 2 Only | 2                           |
| P62258     | 14-3-3 protein epsilon                                               | Biological Replicate 2 Only | 1                           |
| P61981     | 14-3-3 protein gamma                                                 | Biological Replicate 2 Only | 1                           |
| P27348     | 14-3-3 protein theta                                                 | Both Biological Replicates  | 2                           |
| P63104     | 14-3-3 protein zeta/delta                                            | Both Biological Replicates  | 2                           |
| P00973     | 2'-5'-oligoadenylate synthase 1                                      | Biological Replicate 2 Only | 1                           |
| P35998     | 26S proteasome regulatory subunit 7                                  | Biological Replicate 2 Only | 1                           |
| Q9Y3D3     | 28S ribosomal protein S16, mitochondrial                             | Biological Replicate 1 Only | 1                           |
| P52815     | 39S ribosomal protein L12, mitochondrial                             | Biological Replicate 2 Only | 1                           |
| P62269     | 40S ribosomal protein S18                                            | Biological Replicate 2 Only | 2                           |
| P62854     | 40S ribosomal protein S26                                            | Biological Replicate 2 Only | 1                           |
| P42677     | 40S ribosomal protein S27                                            | Biological Replicate 2 Only | 1                           |
| P62753     | 40S ribosomal protein S6                                             | Biological Replicate 2 Only | 1                           |
| P10809     | 60 kDa heat shock protein, mitochondrial                             | Biological Replicate 2 Only | 3                           |
| P26373     | 60S ribosomal protein L13                                            | Biological Replicate 2 Only | 1                           |
| P83731     | 60S ribosomal protein L24                                            | Biological Replicate 2 Only | 1                           |
| P62917     | 60S ribosomal protein L8                                             | Both Biological Replicates  | 2                           |
| P68032     | Actin, alpha cardiac muscle 1                                        | Both Biological Replicates  | 7                           |
| P68032     | Actin, alpha cardiac muscle 1                                        | Both Biological Replicates  | 7                           |
| P60709     | Actin, cytoplasmic 1                                                 | Both Biological Replicates  | 14                          |
| Q53H12     | Acylglycerol kinase, mitochondrial                                   | Biological Replicate 2 Only | 1                           |
| O95622     | Adenylate cyclase type 5                                             | Biological Replicate 1 Only | 1                           |
| Q13023     | A-kinase anchor protein 6                                            | Biological Replicate 1 Only | 1                           |
| Q5JTZ9     | Alanine--tRNA ligase, mitochondrial                                  | Biological Replicate 1 Only | 1                           |
| P06733     | Alpha-enolase                                                        | Both Biological Replicates  | 4                           |
| Q9UJX4     | Anaphase-promoting complex subunit 5                                 | Biological Replicate 1 Only | 1                           |
| Q8TF21     | Ankyrin repeat domain-containing protein 24                          | Biological Replicate 1 Only | 1                           |
| A6QL64     | Ankyrin repeat domain-containing protein 36A                         | Biological Replicate 1 Only | 1                           |
| P05089     | Arginase-1                                                           | Biological Replicate 2 Only | 1                           |
| P25705     | ATP synthase subunit alpha, mitochondrial                            | Both Biological Replicates  | 3                           |
| P06576     | ATP synthase subunit beta, mitochondrial                             | Biological Replicate 2 Only | 3                           |
| Q8WXE1     | ATR-interacting protein                                              | Biological Replicate 2 Only | 1                           |
| Q9P281     | BAH and coiled-coil domain-containing protein 1                      | Biological Replicate 2 Only | 1                           |
| P35613     | Basigin                                                              | Both Biological Replicates  | 2                           |
| Q562R1     | Beta-actin-like protein 2                                            | Both Biological Replicates  | 4                           |
| Q6PJG6     | BRCA1-associated ATM activator 1                                     | Biological Replicate 1 Only | 1                           |
| Q9ULD4     | Bromodomain and PHD finger-containing protein 3                      | Biological Replicate 1 Only | 1                           |
| Q8NCU7     | C2 calcium-dependent domain-containing protein 4A                    | Biological Replicate 1 Only | 1                           |
| P55285     | Cadherin-6                                                           | Biological Replicate 1 Only | 1                           |
| Q12791     | Calcium-activated potassium channel subunit alpha-1                  | Biological Replicate 2 Only | 1                           |
| Q9P1Z2     | Calcium-binding and coiled-coil domain-containing protein 1          | Biological Replicate 2 Only | 1                           |
| Q96JQ2     | Calmin                                                               | Biological Replicate 1 Only | 1                           |
| P27797     | Calreticulin                                                         | Both Biological Replicates  | 3                           |
| Q6ZU35     | Cancer-related regulator of actin dynamics                           | Biological Replicate 1 Only | 1                           |
| Q8TBY9     | Cilia- and flagella-associated protein 251                           | Biological Replicate 1 Only | 1                           |
| P08709     | Coagulation factor VII                                               | Biological Replicate 2 Only | 1                           |
| P53618     | Coatomer subunit beta                                                | Biological Replicate 1 Only | 1                           |
| Q8TD31     | Coiled-coil alpha-helical rod protein 1                              | Biological Replicate 1 Only | 1                           |
| Q17RW2     | Collagen alpha-1                                                     | Biological Replicate 1 Only | 1                           |
| Q07021     | Complement component 1 Q subcomponent-binding protein, mitochondrial | Both Biological Replicates  | 4                           |
| Q9BXR6     | Complement factor H-related protein 5                                | Biological Replicate 1 Only | 1                           |
| Q9C0A0     | Contactin-associated protein-like 4                                  | Biological Replicate 2 Only | 1                           |
| O75367     | Core histone macro-H2A.1                                             | Biological Replicate 1 Only | 1                           |
| O75367     | Core histone macro-H2A.1                                             | Biological Replicate 2 Only | 1                           |
| Q9P0M6     | Core histone macro-H2A.2                                             | Biological Replicate 1 Only | 1                           |
| P12277     | Creatine kinase B-type                                               | Both Biological Replicates  | 2                           |

| Uniprot ID | Protein Name                                                     | Biological Replicate        | Number of Modified Peptides |
|------------|------------------------------------------------------------------|-----------------------------|-----------------------------|
| Q9NQW8     | Cyclic nucleotide-gated cation channel beta-3                    | Biological Replicate 2 Only | 1                           |
| Q8NEU8     | DCC-interacting protein 13-beta                                  | Biological Replicate 2 Only | 1                           |
| Q9H7D0     | Dedicator of cytokinesis protein 5                               | Biological Replicate 1 Only | 1                           |
| O76062     | Delta                                                            | Biological Replicate 2 Only | 1                           |
| Q13574     | Diacylglycerol kinase zeta                                       | Biological Replicate 1 Only |                             |
| Q02127     | Dihydroorotate dehydrogenase                                     | Biological Replicate 1 Only | 1                           |
| Q5T890     | DNA excision repair protein ERCC-6-like 2                        | Biological Replicate 2 Only | 1                           |
| P49917     | DNA ligase 4                                                     | Biological Replicate 1 Only | 1                           |
| Q92698     | DNA repair and recombination protein RAD54-like                  | Biological Replicate 2 Only | 1                           |
| O15315     | DNA repair protein RAD51 homolog 2                               | Biological Replicate 2 Only | 1                           |
| P25205     | DNA replication licensing factor MCM3                            | Biological Replicate 2 Only | 1                           |
| Q14566     | DNA replication licensing factor MCM6                            | Biological Replicate 2 Only | 1                           |
| P11387     | DNA topoisomerase 1                                              | Both Biological Replicates  | 2                           |
| P48382     | DNA-binding protein RFX5                                         | Biological Replicate 1 Only | 1                           |
| Q0VDD8     | Dynein heavy chain 14, axonemal                                  | Biological Replicate 2 Only | 1                           |
| Q8TE73     | Dynein heavy chain 5, axonemal                                   | Biological Replicate 1 Only | 1                           |
| Q8WXX0     | Dynein heavy chain 7, axonemal                                   | Biological Replicate 1 Only | 1                           |
| Q96JB1     | Dynein heavy chain 8, axonemal                                   | Biological Replicate 1 Only | 1                           |
| O75923     | Dysferlin                                                        | Biological Replicate 2 Only | 1                           |
| P22681     | E3 ubiquitin-protein ligase CBL                                  | Biological Replicate 2 Only | 1                           |
| O15344     | E3 ubiquitin-protein ligase Midline-1                            | Biological Replicate 2 Only | 1                           |
| O14638     | Ectonucleotide pyrophosphatase/phosphodiesterase family member 3 | Biological Replicate 2 Only | 1                           |
| A4FU69     | EF-hand calcium-binding domain-containing protein 5              | Biological Replicate 1 Only | 1                           |
| P13804     | Electron transfer flavoprotein subunit alpha, mitochondrial      | Biological Replicate 2 Only | 1                           |
| P68104     | Elongation factor 1-alpha 1                                      | Both Biological Replicates  | 3                           |
| P13639     | Elongation factor 2                                              | Biological Replicate 2 Only | 2                           |
| P49411     | Elongation factor Tu, mitochondrial                              | Biological Replicate 1 Only | 1                           |
| Q9NRM1     | Enamelin                                                         | Biological Replicate 1 Only | 1                           |
| Q9YNA8     | Endogenous retrovirus group K member 19 Gag polyprotein          | Biological Replicate 1 Only | 1                           |
| P11021     | Endoplasmic reticulum chaperone BiP                              | Both Biological Replicates  | 5                           |
| P14625     | Endoplasmic                                                      | Both Biological Replicates  | 6                           |
| Q92556     | Engulfment and cell motility protein 1                           | Biological Replicate 1 Only | 1                           |
| P54764     | Ephrin type-A receptor 4                                         | Biological Replicate 1 Only | 1                           |
| Q6ZVH7     | Espin-like protein                                               | Biological Replicate 2 Only | 1                           |
| P60842     | Eukaryotic initiation factor 4A-I                                | Both Biological Replicates  | 3                           |
| Q14240     | Eukaryotic initiation factor 4A-II                               | Biological Replicate 2 Only | 1                           |
| Q9Y2L1     | Exosome complex exonuclease RRP44                                | Both Biological Replicates  | 2                           |
| O14980     | Exportin-1                                                       | Biological Replicate 2 Only | 1                           |
| Q8NFF0     | F-box DNA helicase 1                                             | Biological Replicate 1 Only | 1                           |
| P21333     | Filamin-A                                                        | Biological Replicate 1 Only | 1                           |
| O60548     | Forkhead box protein D2                                          | Biological Replicate 1 Only | 1                           |
| Q16595     | Fratxin, mitochondrial                                           | Biological Replicate 2 Only | 1                           |
| P04075     | Fructose-bisphosphate aldolase A                                 | Biological Replicate 2 Only | 1                           |
| P09104     | Gamma-enolase                                                    | Biological Replicate 1 Only | 1                           |
| Q9NQR9     | Glucose-6-phosphatase 2                                          | Biological Replicate 1 Only | 1                           |
| P14314     | Glucosidase 2 subunit beta                                       | Biological Replicate 2 Only | 2                           |
| P04406     | Glyceraldehyde-3-phosphate dehydrogenase                         | Both Biological Replicates  | 5                           |
| Q3T8J9     | GON-4-like protein                                               | Biological Replicate 1 Only | 1                           |
| Q8TBN0     | Guanine nucleotide exchange factor for Rab-3A                    | Biological Replicate 1 Only | 1                           |
| P0DMV9     | Heat shock 70 kDa protein 1B                                     | Both Biological Replicates  | 3                           |
| P0DMV9     | Heat shock 70 kDa protein 1B                                     | Both Biological Replicates  | 3                           |
| P34931     | Heat shock 70 kDa protein 1-like                                 | Both Biological Replicates  | 3                           |
| P34932     | Heat shock 70 kDa protein 4                                      | Biological Replicate 1 Only | 1                           |
| P17066     | Heat shock 70 kDa protein 6                                      | Both Biological Replicates  | 3                           |
| P11142     | Heat shock cognate 71 kDa protein                                | Biological Replicate 1 Only | 2                           |
| Q12931     | Heat shock protein 75 kDa, mitochondrial                         | Biological Replicate 2 Only | 1                           |
| P07900     | Heat shock protein HSP 90-alpha                                  | Both Biological Replicates  | 4                           |
| P08238     | Heat shock protein HSP 90-beta                                   | Both Biological Replicates  | 3                           |
| P08238     | Heat shock protein HSP 90-beta                                   | Both Biological Replicates  | 3                           |

| Uniprot ID | Protein Name                                                | Biological Replicate        | Number of Modified Peptides |
|------------|-------------------------------------------------------------|-----------------------------|-----------------------------|
| P54652     | Heat shock-related 70 kDa protein 2                         | Biological Replicate 1 Only | 1                           |
| Q9UM44     | HERV-H LTR-associating protein 2                            | Biological Replicate 1 Only | 1                           |
| P09651     | Heterogeneous nuclear ribonucleoprotein A1                  | Biological Replicate 2 Only | 1                           |
| P61978     | Heterogeneous nuclear ribonucleoprotein K                   | Biological Replicate 2 Only | 2                           |
| P52272     | Heterogeneous nuclear ribonucleoprotein M                   | Both Biological Replicates  | 2                           |
| Q00839     | Heterogeneous nuclear ribonucleoprotein U                   | Biological Replicate 2 Only | 1                           |
| P22626     | Heterogeneous nuclear ribonucleoproteins A2/B1              | Both Biological Replicates  | 3                           |
| P07910     | Heterogeneous nuclear ribonucleoproteins C1/C2              | Biological Replicate 2 Only | 1                           |
| Q93077     | Histone H2A type 1-C                                        | Both Biological Replicates  | 2                           |
| Q6FI13     | Histone H2A type 2-A                                        | Biological Replicate 1 Only | 1                           |
| P0C0S5     | Histone H2A.Z                                               | Both Biological Replicates  | 2                           |
| P16104     | Histone H2AX                                                | Biological Replicate 2 Only | 1                           |
| O60814     | Histone H2B type 1-K                                        | Both Biological Replicates  | 2                           |
| P68431     | Histone H3.1                                                | Biological Replicate 1 Only | 1                           |
| P68431     | Histone H3.1                                                | Biological Replicate 2 Only | 1                           |
| Q16695     | Histone H3.1t                                               | Biological Replicate 1 Only | 1                           |
| Q16695     | Histone H3.1t                                               | Biological Replicate 2 Only | 1                           |
| Q71DI3     | Histone H3.2                                                | Biological Replicate 2 Only | 1                           |
| Q71DI3     | Histone H3.2                                                | Both Biological Replicates  | 3                           |
| P84243     | Histone H3.3                                                | Biological Replicate 2 Only | 1                           |
| P62805     | Histone H4                                                  | Both Biological Replicates  | 7                           |
| Q16576     | Histone-binding protein RBBP7                               | Biological Replicate 2 Only | 1                           |
| O96028     | Histone-lysine N-methyltransferase NSD2                     | Biological Replicate 1 Only | 1                           |
| P42858     | Huntingtin                                                  | Biological Replicate 2 Only | 1                           |
| Q8TEX9     | Importin-4                                                  | Biological Replicate 1 Only | 1                           |
| O15327     | Inositol polyphosphate 4-phosphatase type II                | Biological Replicate 1 Only | 1                           |
| Q9UL03     | Integrator complex subunit 6                                | Biological Replicate 1 Only | 1                           |
| P48551     | Interferon alpha/beta receptor 2                            | Biological Replicate 1 Only | 1                           |
| Q5VZ66     | Janus kinase and microtubule-interacting protein 3          | Biological Replicate 1 Only | 1                           |
| Q2WJG6     | Kelch-like protein 38                                       | Biological Replicate 1 Only | 1                           |
| P13645     | Keratin, type I cytoskeletal 10                             | Both Biological Replicates  | 5                           |
| P08779     | Keratin, type I cytoskeletal 16                             | Biological Replicate 1 Only | 1                           |
| P35527     | Keratin, type I cytoskeletal 9                              | Both Biological Replicates  | 7                           |
| P04264     | Keratin, type II cytoskeletal 1                             | Both Biological Replicates  | 5                           |
| P35908     | Keratin, type II cytoskeletal 2 epidermal                   | Biological Replicate 1 Only | 4                           |
| P13647     | Keratin, type II cytoskeletal 5                             | Biological Replicate 1 Only | 1                           |
| P04259     | Keratin, type II cytoskeletal 6B                            | Biological Replicate 1 Only | 1                           |
| Q9H9P8     | L-2-hydroxyglutarate dehydrogenase, mitochondrial           | Biological Replicate 2 Only | 1                           |
| Q04760     | Lactoylglutathione lyase                                    | Biological Replicate 1 Only | 1                           |
| P42166     | Lamina-associated polypeptide 2, isoform alpha              | Biological Replicate 1 Only | 1                           |
| P42167     | Lamina-associated polypeptide 2, isoforms beta/gamma        | Biological Replicate 1 Only | 1                           |
| Q14767     | Latent-transforming growth factor beta-binding protein 2    | Biological Replicate 2 Only | 1                           |
| Q9HCC9     | Lateral signaling target protein 2 homolog                  | Biological Replicate 2 Only | 1                           |
| A6NIV6     | Leucine-rich repeat and IQ domain-containing protein 4      | Biological Replicate 1 Only | 1                           |
| Q05C16     | Leucine-rich repeat-containing protein 63                   | Biological Replicate 2 Only | 1                           |
| P07195     | L-lactate dehydrogenase B chain                             | Biological Replicate 2 Only | 1                           |
| P36776     | Lon protease homolog, mitochondrial                         | Biological Replicate 1 Only | 1                           |
| O95232     | Luc7-like protein 3                                         | Biological Replicate 1 Only | 1                           |
| Q9Y4C1     | Lysine-specific demethylase 3A                              | Biological Replicate 2 Only | 1                           |
| Q6B016     | Lysine-specific demethylase 4D                              | Both Biological Replicates  | 2                           |
| Q8NDA8     | Maestro heat-like repeat-containing protein family member 1 | Biological Replicate 1 Only | 1                           |
| A6NGR9     | Maestro heat-like repeat-containing protein family member 6 | Biological Replicate 2 Only | 1                           |
| P55145     | Mesencephalic astrocyte-derived neurotrophic factor         | Biological Replicate 1 Only | 1                           |
| Q86V40     | Metalloprotease TIK11                                       | Biological Replicate 1 Only | 1                           |
| Q16891     | MICOS complex subunit MIC60                                 | Biological Replicate 1 Only | 1                           |
| Q8N4C8     | Misshapen-like kinase 1                                     | Biological Replicate 2 Only | 1                           |
| Q9NS69     | Mitochondrial import receptor subunit TOM22 homolog         | Both Biological Replicates  | 2                           |
| Q9P2K5     | Myelin expression factor 2                                  | Biological Replicate 2 Only | 1                           |
| Q9NZM1     | Myoferlin                                                   | Biological Replicate 2 Only | 1                           |

| Uniprot ID | Protein Name                                                                 | Biological Replicate        | Number of Modified Peptides |
|------------|------------------------------------------------------------------------------|-----------------------------|-----------------------------|
| P35580     | Myosin-10                                                                    | Biological Replicate 1 Only | 1                           |
| P35749     | Myosin-11                                                                    | Biological Replicate 1 Only | 1                           |
| Q7Z406     | Myosin-14                                                                    | Biological Replicate 1 Only | 1                           |
| P35579     | Myosin-9                                                                     | Biological Replicate 1 Only | 1                           |
| P35579     | Myosin-9                                                                     | Both Biological Replicates  | 2                           |
| Q95299     | NADH dehydrogenase [ubiquinone] 1 alpha subcomplex subunit 10, mitochondrial | Biological Replicate 1 Only | 1                           |
| P28331     | NADH-ubiquinone oxidoreductase 75 kDa subunit, mitochondrial                 | Biological Replicate 1 Only | 1                           |
| Q8NFA2     | NADPH oxidase organizer 1                                                    | Biological Replicate 2 Only | 1                           |
| Q8NFP9     | Neurobeachin                                                                 | Biological Replicate 1 Only | 1                           |
| P07196     | Neurofilament light polypeptide                                              | Biological Replicate 2 Only | 2                           |
| P07197     | Neurofilament medium polypeptide                                             | Biological Replicate 1 Only | 1                           |
| Q15758     | Neutral amino acid transporter B                                             | Biological Replicate 2 Only | 1                           |
| Q7Z2Y5     | Nik-related protein kinase                                                   | Biological Replicate 2 Only | 1                           |
| Q15233     | Non-POU domain-containing octamer-binding protein                            | Both Biological Replicates  | 3                           |
| Q14980     | Nuclear mitotic apparatus protein 1                                          | Biological Replicate 2 Only | 1                           |
| P19338     | Nucleolin                                                                    | Both Biological Replicates  | 2                           |
| P15531     | Nucleoside diphosphate kinase A                                              | Both Biological Replicates  | 2                           |
| P22392     | Nucleoside diphosphate kinase B                                              | Biological Replicate 2 Only | 1                           |
| Q5VST9     | Obscurin                                                                     | Biological Replicate 2 Only | 1                           |
| Q96KK4     | Olfactory receptor 10C1                                                      | Biological Replicate 2 Only | 1                           |
| Q9NZT2     | Opioid growth factor receptor                                                | Biological Replicate 2 Only | 1                           |
| Q13415     | Origin recognition complex subunit 1                                         | Biological Replicate 1 Only | 1                           |
| Q9Y5N6     | Origin recognition complex subunit 6                                         | Biological Replicate 1 Only | 1                           |
| Q3ZCN5     | Otogelin-like protein                                                        | Biological Replicate 1 Only | 1                           |
| Q9NX31     | Oxidative stress-responsive serine-rich protein 1                            | Biological Replicate 2 Only | 1                           |
| Q8IUH4     | Palmitoyltransferase ZDHHC13                                                 | Biological Replicate 1 Only | 1                           |
| Q8IUH5     | Palmitoyltransferase ZDHHC17                                                 | Biological Replicate 2 Only | 1                           |
| A0A0J9YXQ4 | Paraneoplastic antigen Ma6E                                                  | Biological Replicate 1 Only | 1                           |
| O00151     | PDZ and LIM domain protein 1                                                 | Biological Replicate 2 Only | 1                           |
| Q96AY3     | Peptidyl-prolyl cis-trans isomerase FKBP10                                   | Both Biological Replicates  | 2                           |
| P41219     | Peripherin                                                                   | Both Biological Replicates  | 2                           |
| Q06830     | Peroxiredoxin-1                                                              | Both Biological Replicates  | 2                           |
| Q9NRQ2     | Phospholipid scramblase 4                                                    | Biological Replicate 1 Only | 1                           |
| Q8NB49     | Phospholipid-transporting ATPase IG                                          | Biological Replicate 1 Only | 1                           |
| O15067     | Phosphoribosylformylglycinamide synthase                                     | Biological Replicate 2 Only | 1                           |
| Q7Z3H0     | Photoreceptor ankyrin repeat protein                                         | Biological Replicate 2 Only | 1                           |
| Q8NC51     | Plasminogen activator inhibitor 1 RNA-binding protein                        | Both Biological Replicates  | 3                           |
| Q15198     | Platelet-derived growth factor receptor-like protein                         | Biological Replicate 2 Only | 1                           |
| Q15149     | Plectin                                                                      | Biological Replicate 2 Only | 1                           |
| Q8IUK5     | Plexin domain-containing protein 1                                           | Biological Replicate 2 Only | 1                           |
| Q15365     | Poly (rC)-binding protein 1                                                  | Biological Replicate 1 Only | 1                           |
| Q15365     | Poly(rC)binding protein 1                                                    | Both Biological Replicates  | 2                           |
| Q15366     | Poly(rC)binding protein 2                                                    | Both Biological Replicates  | 2                           |
| Q8TBY8     | Polyamine-modulated factor 1-binding protein 1                               | Biological Replicate 2 Only | 1                           |
| P0CG47     | Polyubiquitin-B [Cleaved into: Ubiquitin]                                    | Biological Replicate 2 Only | 1                           |
| P54707     | Potassium-transporting ATPase alpha chain 2                                  | Both Biological Replicates  | 2                           |
| Q13029     | PR domain zinc finger protein 2                                              | Biological Replicate 1 Only | 1                           |
| Q7L3T8     | Probable proline--tRNA ligase, mitochondrial                                 | Biological Replicate 1 Only | 1                           |
| P07737     | Profilin-1                                                                   | Biological Replicate 2 Only | 1                           |
| Q9UQ80     | Proliferation-associated protein 2G4                                         | Biological Replicate 2 Only | 1                           |
| Q14914     | Prostaglandin reductase 1                                                    | Biological Replicate 1 Only | 1                           |
| P28066     | Proteasome subunit alpha type-5                                              | Biological Replicate 1 Only | 1                           |
| P07237     | Protein disulfide-isomerase                                                  | Both Biological Replicates  | 2                           |
| P30101     | Protein disulfide-isomerase A3                                               | Biological Replicate 2 Only | 1                           |
| P13667     | Protein disulfide-isomerase A4                                               | Biological Replicate 2 Only | 1                           |
| Q95905     | Protein ecdysoneless homolog                                                 | Biological Replicate 2 Only | 1                           |
| P49257     | Protein ERGIC-53                                                             | Biological Replicate 1 Only | 1                           |
| A8MVW0     | Protein FAM171A2                                                             | Biological Replicate 1 Only | 1                           |
| A2RU67     | Protein FAM234B                                                              | Both Biological Replicates  | 2                           |

| Uniprot ID | Protein Name                                                                     | Biological Replicate        | Number of Modified Peptides |
|------------|----------------------------------------------------------------------------------|-----------------------------|-----------------------------|
| P61244     | Protein max                                                                      | Biological Replicate 1 Only | 1                           |
| Q6ZRQ5     | Protein MMS22-like                                                               | Biological Replicate 2 Only | 1                           |
| Q460N3     | Protein mono-ADP-ribosyltransferase PARP15                                       | Biological Replicate 1 Only | 1                           |
| Q96FB5     | Protein RRNAD1                                                                   | Biological Replicate 2 Only | 1                           |
| Q14160     | Protein scribble homolog                                                         | Biological Replicate 1 Only | 1                           |
| P49221     | Protein-glutamine gamma-glutamyltransferase 4                                    | Both Biological Replicates  | 2                           |
| Q58FG1     | Putative heat shock protein HSP 90-alpha A4                                      | Biological Replicate 1 Only | 1                           |
| Q58FG1     | Putative heat shock protein HSP 90-alpha A4                                      | Biological Replicate 2 Only | 1                           |
| Q6DN03     | Putative histone H2B type 2-C                                                    | Biological Replicate 2 Only | 1                           |
| Q495Z4     | Putative uncharacterized protein ASB16-AS1                                       | Biological Replicate 1 Only | 1                           |
| Q6ZRU5     | Putative uncharacterized protein FLJ46089                                        | Biological Replicate 1 Only | 1                           |
| Q4ADV7     | RAB6A-GEF complex partner protein 1                                              | Biological Replicate 2 Only | 1                           |
| Q9UHP6     | Radial spoke head 14 homolog                                                     | Biological Replicate 2 Only | 1                           |
| Q13576     | Ras GTPase-activating-like protein IQGAP2                                        | Biological Replicate 1 Only | 1                           |
| Q86VI3     | Ras GTPase-activating-like protein IQGAP3                                        | Biological Replicate 1 Only | 1                           |
| Q9H0U4     | Ras-related protein Rab-1B                                                       | Biological Replicate 1 Only | 1                           |
| Q86X27     | Ras-specific guanine nucleotide-releasing factor RalGPS2                         | Biological Replicate 1 Only | 1                           |
| Q8TDY2     | RB1-inducible coiled-coil protein 1                                              | Biological Replicate 2 Only | 1                           |
| Q9Y5S9     | RNA-binding protein 8A                                                           | Both Biological Replicates  | 2                           |
| P35637     | RNA-binding protein FUS                                                          | Both Biological Replicates  | 2                           |
| Q92736     | Ryanodine receptor 2                                                             | Both Biological Replicates  | 3                           |
| Q15413     | Ryanodine receptor 3                                                             | Biological Replicate 1 Only | 1                           |
| Q15413     | Ryanodine receptor 3                                                             | Both Biological Replicates  | 2                           |
| Q8NBX0     | Saccharopine dehydrogenase-like oxidoreductase                                   | Biological Replicate 2 Only | 1                           |
| O43865     | S-adenosylhomocysteine hydrolase-like protein 1                                  | Biological Replicate 1 Only | 1                           |
| Q5VUG0     | Scm-like with four MBT domains protein 2                                         | Biological Replicate 2 Only | 1                           |
| Q6UWB4     | Serine protease 55                                                               | Biological Replicate 1 Only | 1                           |
| Q8IWQ3     | Serine/threonine-protein kinase BRSK2                                            | Biological Replicate 1 Only | 1                           |
| Q9Y5S2     | Serine/threonine-protein kinase MRCK beta                                        | Biological Replicate 1 Only | 1                           |
| Q8TD19     | Serine/threonine-protein kinase Nek9                                             | Biological Replicate 2 Only | 1                           |
| Q9H4A3     | Serine/threonine-protein kinase WNK1                                             | Biological Replicate 1 Only | 1                           |
| P11831     | Serum response factor                                                            | Biological Replicate 1 Only | 1                           |
| P09132     | Signal recognition particle 19 kDa protein                                       | Biological Replicate 2 Only | 1                           |
| P62306     | Small nuclear ribonucleoprotein F                                                | Biological Replicate 1 Only | 1                           |
| Q9Y5X3     | Sorting nexin-5                                                                  | Biological Replicate 1 Only | 1                           |
| Q9Y4P9     | Sperm flagellar protein 1                                                        | Biological Replicate 1 Only | 1                           |
| Q15459     | Splicing factor 3A subunit 1                                                     | Biological Replicate 1 Only | 1                           |
| P23246     | Splicing factor, proline- and glutamine-rich                                     | Both Biological Replicates  | 2                           |
| A6NHR9     | Structural maintenance of chromosomes flexible hinge domain-containing protein 1 | Biological Replicate 1 Only | 1                           |
| O95347     | Structural maintenance of chromosomes protein 2                                  | Biological Replicate 1 Only | 1                           |
| Q16623     | Syntaxin-1A                                                                      | Biological Replicate 2 Only | 1                           |
| Q13148     | TAR DNA-binding protein 43                                                       | Biological Replicate 2 Only | 1                           |
| Q96DN5     | TBC1 domain family member 31                                                     | Biological Replicate 1 Only | 1                           |
| O95759     | TBC1 domain family member 8                                                      | Biological Replicate 1 Only | 1                           |
| P40227     | T-complex protein 1 subunit zeta                                                 | Biological Replicate 1 Only | 1                           |
| Q2MV58     | Tectonic-1                                                                       | Biological Replicate 1 Only | 1                           |
| Q6NT89     | TMF-regulated nuclear protein 1                                                  | Biological Replicate 1 Only | 1                           |
| Q13263     | Transcription intermediary factor 1-beta                                         | Biological Replicate 2 Only | 1                           |
| P46100     | Transcriptional regulator ATRX                                                   | Both Biological Replicates  | 2                           |
| P62995     | Transformer-2 protein homolog beta                                               | Biological Replicate 1 Only | 1                           |
| P37802     | Transgelin-2                                                                     | Biological Replicate 1 Only | 1                           |
| P55072     | Transitional endoplasmic reticulum ATPase                                        | Biological Replicate 2 Only | 1                           |
| P57088     | Transmembrane protein 33                                                         | Biological Replicate 1 Only | 1                           |
| Q9NUR3     | Transmembrane protein 74B                                                        | Biological Replicate 1 Only | 1                           |
| A6NGJ6     | Tripartite motif-containing protein 64                                           | Biological Replicate 2 Only | 1                           |
| Q9Y310     | tRNA-splicing ligase RtcB homolog                                                | Biological Replicate 2 Only | 1                           |
| P07478     | Trypsin-2                                                                        | Both Biological Replicates  | 2                           |
| P68363     | Tubulin alpha-1B chain                                                           | Biological Replicate 2 Only | 1                           |
| Q9BQE3     | Tubulin alpha-1C chain                                                           | Biological Replicate 2 Only | 1                           |



| Uniprot ID | Protein Name                                             | Biological Replicate        | Number of Modified Peptides |
|------------|----------------------------------------------------------|-----------------------------|-----------------------------|
| P68366     | Tubulin alpha-4A chain                                   | Biological Replicate 1 Only | 1                           |
| Q9NY65     | Tubulin alpha-8 chain                                    | Biological Replicate 2 Only | 1                           |
| P07437     | Tubulin beta chain                                       | Biological Replicate 2 Only | 5                           |
| P07437     | Tubulin beta chain                                       | Both Biological Replicates  | 10                          |
| Q9H4B7     | Tubulin beta-1 chain                                     | Both Biological Replicates  | 2                           |
| Q13885     | Tubulin beta-2A chain                                    | Biological Replicate 1 Only | 5                           |
| Q9BVA1     | Tubulin beta-2B chain                                    | Both Biological Replicates  | 11                          |
| Q13509     | Tubulin beta-3 chain                                     | Biological Replicate 1 Only | 3                           |
| Q13509     | Tubulin beta-3 chain                                     | Both Biological Replicates  | 7                           |
| P04350     | Tubulin beta-4A chain                                    | Both Biological Replicates  | 6                           |
| P04350     | Tubulin beta-4A chain                                    | Both Biological Replicates  | 6                           |
| P68371     | Tubulin beta-4B chain                                    | Both Biological Replicates  | 12                          |
| Q9BUF5     | Tubulin beta-6 chain                                     | Both Biological Replicates  | 4                           |
| Q3ZCM7     | Tubulin beta-8 chain                                     | Biological Replicate 1 Only | 3                           |
| C9JJH3     | Ubiquitin carboxyl-terminal hydrolase 17-like protein 10 | Biological Replicate 1 Only | 1                           |
| P62979     | Ubiquitin-40S ribosomal protein S27a                     | Biological Replicate 2 Only | 1                           |
| Q14157     | Ubiquitin-associated protein 2-like                      | Biological Replicate 2 Only | 1                           |
| P22314     | Ubiquitin-like modifier-activating enzyme 1              | Biological Replicate 1 Only | 2                           |
| Q68DL7     | Uncharacterized protein C18orf63                         | Biological Replicate 1 Only | 1                           |
| Q9ULG3     | Uncharacterized protein KIAA1257                         | Biological Replicate 2 Only | 1                           |
| Q92614     | Unconventional myosin-XVIIIa                             | Biological Replicate 2 Only | 1                           |
| Q5T230     | Undifferentiated embryonic cell transcription factor 1   | Biological Replicate 1 Only | 1                           |
| Q6ZVL6     | UPF0606 protein KIAA1549L                                | Biological Replicate 2 Only | 1                           |
| P46939     | Utrophin                                                 | Biological Replicate 2 Only | 1                           |
| Q68DQ2     | Very large A-kinase anchor protein                       | Biological Replicate 2 Only | 1                           |
| P08670     | Vimentin                                                 | Both Biological Replicates  | 7                           |
| P04275     | von Willebrand factor                                    | Biological Replicate 1 Only | 2                           |
| O00534     | von Willebrand factor A domain-containing protein 5A     | Biological Replicate 1 Only | 1                           |
| Q9Y4E6     | WD repeat-containing protein 7                           | Biological Replicate 2 Only | 1                           |
| P67809     | Y-box-binding protein 1                                  | Both Biological Replicates  | 2                           |
| Q8WYQ9     | Zinc finger CCHC domain-containing protein 14            | Biological Replicate 1 Only | 1                           |
| Q9NUD5     | Zinc finger CCHC domain-containing protein 3             | Biological Replicate 2 Only | 1                           |
| P52740     | Zinc finger protein 132                                  | Biological Replicate 1 Only | 1                           |
| Q86Y25     | Zinc finger protein 354C                                 | Biological Replicate 1 Only | 1                           |
| Q9BX82     | Zinc finger protein 471                                  | Biological Replicate 1 Only | 1                           |
| Q8WV37     | Zinc finger protein 480                                  | Biological Replicate 2 Only | 1                           |
| Q9C0D4     | Zinc finger protein 518B                                 | Biological Replicate 1 Only | 1                           |
| Q96IR2     | Zinc finger protein 845                                  | Biological Replicate 1 Only | 1                           |

Table S3. IC-FPOP oxidatively modified proteins in CHO Cells.

| Uniprot ID | Protein Name                                                  | Biological Replicate        | Number of Modified Peptides |
|------------|---------------------------------------------------------------|-----------------------------|-----------------------------|
| G3ICC6     | 14-3-3 protein theta                                          | Biological Replicate 1 Only | 1                           |
| G3I7D7     | 14-3-3 protein theta                                          | Biological Replicate 1 Only | 1                           |
| G3HE31     | 26S protease regulatory subunit 7                             | Biological Replicate 1 Only | 1                           |
| G3GSW2     | 28S ribosomal protein S22, mitochondrial                      | Biological Replicate 1 Only | 1                           |
| G3HWX4     | 40S ribosomal protein S15                                     | Biological Replicate 1 Only | 1                           |
| G3IF39     | 40S ribosomal protein S15                                     | Biological Replicate 1 Only | 1                           |
| G3HTK9     | 40S ribosomal protein S3a                                     | Biological Replicate 1 Only | 1                           |
| G3HUW8     | 40S ribosomal protein S4                                      | Biological Replicate 1 Only | 1                           |
| G3GYQ6     | 4-hydroxyphenylpyruvate dioxygenase                           | Biological Replicate 1 Only | 1                           |
| G3ILU9     | 52 kDa Ro protein                                             | Biological Replicate 1 Only | 1                           |
| G3IKK4     | 60 kDa heat shock protein, mitochondrial                      | Biological Replicate 1 Only | 1                           |
| G3I488     | 60S ribosomal protein L23                                     | Biological Replicate 1 Only | 1                           |
| G3H602     | 60S ribosomal protein L36a                                    | Biological Replicate 1 Only | 1                           |
| G3H8N3     | 60S ribosomal protein L4                                      | Biological Replicate 1 Only | 1                           |
| G3HAD3     | 60S ribosomal protein L6                                      | Biological Replicate 1 Only | 1                           |
| G3H7F8     | Acidic leucine-rich nuclear phosphoprotein 32 family member B | Biological Replicate 1 Only | 1                           |
| G3HV77     | ADCK3                                                         | Biological Replicate 1 Only | 1                           |
| G3HDZ3     | Adseverin                                                     | Biological Replicate 1 Only | 1                           |
| G3H638     | AHSA1                                                         | Biological Replicate 1 Only | 1                           |
| G3HUC2     | A-kinase anchor protein 2                                     | Biological Replicate 1 Only | 1                           |
| G3HWK8     | Alanine aminotransferase 1                                    | Biological Replicate 1 Only | 1                           |
| G3HMV7     | Alpha-L-fucosidase                                            | Biological Replicate 1 Only | 1                           |
| G3H559     | Alpha-mannosidase                                             | Biological Replicate 1 Only | 1                           |
| G3HV21     | Angiopoietin-related protein 2                                | Biological Replicate 1 Only | 1                           |
| G3HSZ4     | Anionic trypsin-2                                             | Biological Replicate 1 Only | 1                           |
| G3HXA1     | Ankyrin repeat and MYND domain-containing protein 2           | Biological Replicate 1 Only | 1                           |
| G3IF65     | Ankyrin-2                                                     | Biological Replicate 1 Only | 1                           |
| G3HXL6     | Annexin                                                       | Biological Replicate 1 Only | 1                           |
| G3IFZ0     | Antigen KI-67                                                 | Biological Replicate 1 Only | 1                           |
| G3I8B9     | AP-2 complex subunit beta                                     | Biological Replicate 1 Only | 1                           |
| G3HRA3     | ARF GTPase-activating protein GIT1                            | Biological Replicate 1 Only | 1                           |
| G3H5C6     | Armadillo repeat-containing protein 3                         | Biological Replicate 1 Only | 1                           |
| G3H3N9     | Armadillo repeat-containing protein 4                         | Biological Replicate 1 Only | 1                           |
| G3IN17     | Ataxin-1-like                                                 | Biological Replicate 1 Only | 1                           |
| G3I432     | ATPase family AAA domain-containing protein 3                 | Biological Replicate 1 Only | 1                           |
| G3GU86     | Bardet-Biedl syndrome 5 protein-like                          | Biological Replicate 1 Only | 1                           |
| G3ILS9     | B-cell CLL/lymphoma 9-like protein                            | Biological Replicate 1 Only | 1                           |
| G3I6Z7     | B-cell scaffold protein with ankyrin repeats                  | Biological Replicate 1 Only | 1                           |
| G3HXJ8     | Biorientation of chromosomes in cell division protein 1-like  | Biological Replicate 1 Only | 1                           |
| G3HQS5     | Bromodomain-containing protein 2                              | Biological Replicate 1 Only | 1                           |
| G3HXE4     | Bullous pemphigoid antigen 1, isoforms 1/2/3/4                | Biological Replicate 1 Only | 1                           |
| G3ILG5     | Bystin                                                        | Biological Replicate 1 Only | 1                           |
| G3HHR6     | Cadherin-18                                                   | Biological Replicate 1 Only | 1                           |
| G3GUB3     | Calcium-binding mitochondrial carrier protein Aralar1         | Biological Replicate 1 Only | 1                           |
| G3GRX6     | Calcium-transporting ATPase type 2C member 2                  | Biological Replicate 1 Only | 1                           |
| G3HSA2     | Calponin                                                      | Biological Replicate 1 Only | 1                           |
| G3GTB7     | Calumenin                                                     | Biological Replicate 1 Only | 1                           |
| G3ILN5     | Carbonyl reductase 1                                          | Biological Replicate 1 Only | 1                           |
| G3GVZ4     | CC2D1B                                                        | Biological Replicate 1 Only | 1                           |

| Uniprot ID | Protein Name                                                             | Biological Replicate        | Number of Modified Peptides |
|------------|--------------------------------------------------------------------------|-----------------------------|-----------------------------|
| G3HWP9     | Cell division control protein 2-like                                     | Biological Replicate 1 Only | 1                           |
| G3GRF9     | Centromere protein F                                                     | Biological Replicate 1 Only | 1                           |
| G3H7I7     | Centrosome-associated protein 350                                        | Biological Replicate 1 Only | 1                           |
| G3I3A0     | Chromosome-associated kinesin KIF4A                                      | Biological Replicate 1 Only | 1                           |
| G3HF77     | CHTOP                                                                    | Biological Replicate 1 Only | 1                           |
| G3H4Z8     | Citrate synthase, mitochondrial                                          | Biological Replicate 1 Only | 1                           |
| G3H9V2     | Claspin                                                                  | Biological Replicate 1 Only | 1                           |
| G3HUX6     | C-myc promoter-binding protein                                           | Biological Replicate 1 Only | 1                           |
| G3I1K8     | Coiled-coil domain-containing protein 46                                 | Biological Replicate 1 Only | 1                           |
| G3HUW4     | Coiled-coil domain-containing protein 75                                 | Biological Replicate 1 Only | 1                           |
| G3IKH4     | Collagen alpha-2 chain                                                   | Biological Replicate 1 Only | 1                           |
| G3HID0     | COMM domain-containing protein 5                                         | Biological Replicate 1 Only | 1                           |
| G3HKC9     | Copine-5                                                                 | Biological Replicate 1 Only | 1                           |
| G3H6T0     | Core histone macro-H2A.2                                                 | Biological Replicate 1 Only | 1                           |
| G3HEQ3     | Cytoskeleton-associated protein 4                                        | Biological Replicate 1 Only | 1                           |
| G3IHL3     | Dedicator of cytokinesis protein 10                                      | Biological Replicate 1 Only | 1                           |
| G3GZT0     | Deleted in bladder cancer protein 1-like                                 | Biological Replicate 1 Only | 1                           |
| G3IG95     | Deoxynucleotidyltransferase terminal-interacting protein 2               | Biological Replicate 1 Only | 1                           |
| G3I2S3     | Deoxyribonuclease-1-like 2                                               | Biological Replicate 1 Only | 1                           |
| G3I1H0     | DNA helicase                                                             | Biological Replicate 1 Only | 1                           |
| G3I2I1     | DNA helicase                                                             | Biological Replicate 1 Only | 1                           |
| G3IL33     | DNA polymerase eta                                                       | Biological Replicate 1 Only | 1                           |
| G3HA98     | DNA2-like helicase                                                       | Biological Replicate 1 Only | 1                           |
| G3GV24     | Dolichyl-diphosphooligosaccharide--protein glycosyltransferase subunit 1 | Biological Replicate 1 Only | 1                           |
| G3HZA6     | Dynamin-binding protein                                                  | Biological Replicate 1 Only | 1                           |
| G3IAG7     | Dynein heavy chain 3, axonemal                                           | Biological Replicate 1 Only | 1                           |
| G3HAM0     | Dynein heavy chain 5, axonemal                                           | Biological Replicate 1 Only | 1                           |
| G3I0T8     | Dystrophin                                                               | Biological Replicate 1 Only | 1                           |
| G3HRG2     | E3 ubiquitin-protein ligase CBL-B                                        | Biological Replicate 1 Only | 1                           |
| G3HSF5     | E3 ubiquitin-protein ligase HECW1                                        | Biological Replicate 1 Only | 1                           |
| G3GUF2     | E3 ubiquitin-protein ligase MYLIP                                        | Biological Replicate 1 Only | 1                           |
| G3I3W0     | Elongation factor 1-alpha 1                                              | Biological Replicate 1 Only | 1                           |
| G3HXN0     | Endoribonuclease Dicer                                                   | Biological Replicate 1 Only | 1                           |
| G3HDA9     | Envelope glycoprotein                                                    | Biological Replicate 1 Only | 1                           |
| G3HL21     | Ephrin type-B receptor 6                                                 | Biological Replicate 1 Only | 1                           |
| G3HG60     | ETS translocation variant 3                                              | Biological Replicate 1 Only | 1                           |
| G3HEZ1     | Eukaryotic peptide chain release factor subunit 1                        | Biological Replicate 1 Only | 1                           |
| G3IH35     | Eukaryotic translation initiation factor 4 gamma 3                       | Biological Replicate 1 Only | 1                           |
| G3H294     | FAM109A                                                                  | Biological Replicate 1 Only | 1                           |
| G3HH99     | Fanconi anemia group B protein-like                                      | Biological Replicate 1 Only | 1                           |
| G3I729     | F-box/WD repeat-containing protein 11                                    | Biological Replicate 1 Only | 1                           |
| G3H4V2     | FERM, RhoGEF and pleckstrin domain-containing protein 2                  | Biological Replicate 1 Only | 1                           |
| G3I6H5     | Fermitin family-like 2                                                   | Biological Replicate 1 Only | 1                           |
| G3IBK2     | Filamin-A                                                                | Biological Replicate 1 Only | 1                           |
| G3HU61     | Frizzled-5                                                               | Biological Replicate 1 Only | 1                           |
| G3HW85     | FUN14 domain-containing protein 1                                        | Biological Replicate 1 Only | 1                           |
| G3HJV9     | FYVE and coiled-coil domain-containing protein 1                         | Biological Replicate 1 Only | 1                           |
| G3IAS7     | G kinase-anchoring protein 1                                             | Biological Replicate 1 Only | 1                           |
| G3H9D5     | Gametogenetin-binding protein 2                                          | Biological Replicate 1 Only | 1                           |

| Uniprot ID | Protein Name                                                    | Biological Replicate        | Number of Modified Peptides |
|------------|-----------------------------------------------------------------|-----------------------------|-----------------------------|
| G3H914     | Ganglioside-induced differentiation-associated protein 2        | Biological Replicate 1 Only | 1                           |
| G3HG45     | GAPDH                                                           | Biological Replicate 1 Only | 1                           |
| G3HNV7     | Glyceraldehyde-3-phosphate dehydrogenase                        | Biological Replicate 1 Only | 1                           |
| G3HWN9     | Glyceraldehyde-3-phosphate dehydrogenase                        | Biological Replicate 1 Only | 1                           |
| G3HYZ5     | Glyceraldehyde-3-phosphate dehydrogenase                        | Biological Replicate 1 Only | 1                           |
| G3HZ70     | Heat shock 70 kDa protein 1A                                    | Biological Replicate 1 Only | 1                           |
| G3HZE6     | Heat shock 70 kDa protein 1A/1B                                 | Biological Replicate 1 Only | 1                           |
| G3IFX1     | Heterogeneous nuclear ribonucleoprotein C-like 1-like isoform 5 | Biological Replicate 1 Only | 1                           |
| G3HJ68     | Heterogeneous nuclear ribonucleoprotein M                       | Biological Replicate 1 Only | 1                           |
| G3H5W4     | Heterogeneous nuclear ribonucleoprotein Q                       | Biological Replicate 1 Only | 1                           |
| G3IA10     | Heterogeneous nuclear ribonucleoprotein U-like protein 1        | Biological Replicate 1 Only | 1                           |
| G3GWW3     | High mobility group protein B1                                  | Biological Replicate 1 Only | 1                           |
| G3HUX2     | Histone-binding protein RBBP4                                   | Biological Replicate 1 Only | 1                           |
| G3HD83     | Homeobox even-skipped-like protein 1                            | Biological Replicate 1 Only | 1                           |
| G3H295     | Homeobox protein cut-like                                       | Biological Replicate 1 Only | 1                           |
| G3GRY1     | HSDL1                                                           | Biological Replicate 1 Only | 1                           |
| G3GSH2     | HSPA2                                                           | Biological Replicate 1 Only | 1                           |
| G3HA18     | Huntingtin-interacting protein 1                                | Biological Replicate 1 Only | 1                           |
| G3H9Y8     | Hyaluronan mediated motility receptor                           | Biological Replicate 1 Only | 1                           |
| G3I973     | Hypoxia up-regulated protein 1                                  | Biological Replicate 1 Only | 1                           |
| G3H718     | Inhibitor of Bruton tyrosine kinase                             | Biological Replicate 1 Only | 1                           |
| G3H3W4     | Insulin-degrading enzyme                                        | Biological Replicate 1 Only | 1                           |
| G3HDZ7     | Integrin alpha-1                                                | Biological Replicate 1 Only | 1                           |
| G3H884     | Interleukin-17 receptor A                                       | Biological Replicate 1 Only | 1                           |
| G3H3P5     | Kinesin-like protein                                            | Biological Replicate 1 Only | 1                           |
| G3HZE5     | Kinesin-like protein                                            | Biological Replicate 1 Only | 1                           |
| G3H6X6     | Kinesin-like protein                                            | Biological Replicate 1 Only | 1                           |
| G3IE68     | Laminin subunit alpha-2                                         | Biological Replicate 1 Only | 1                           |
| G3H2M7     | Laminin subunit beta-3                                          | Biological Replicate 1 Only | 1                           |
| G3HK76     | LETM1 and EF-hand domain-containing protein 1, mitochondrial    | Biological Replicate 1 Only | 1                           |
| G3HX21     | Leucine-rich repeat flightless-interacting protein 2            | Biological Replicate 1 Only | 1                           |
| G3H0X2     | Leucine-rich repeat-containing protein 57                       | Biological Replicate 1 Only | 1                           |
| G3HZW5     | L-Fucosyltransferase                                            | Biological Replicate 1 Only | 1                           |
| G3HN65     | LIM and SH3 domain protein 1                                    | Biological Replicate 1 Only | 1                           |
| G3HB16     | Lipin-1                                                         | Biological Replicate 1 Only | 1                           |
| G3H3D2     | Lymphoid-restricted membrane protein                            | Biological Replicate 1 Only | 1                           |
| G3HYW2     | Malignant T cell amplified sequence 1                           | Biological Replicate 1 Only | 1                           |
| G3GUB5     | Methionine aminopeptidase                                       | Biological Replicate 1 Only | 1                           |
| G3HKQ7     | Microtubule-associated protein                                  | Biological Replicate 1 Only | 1                           |
| G3H0V1     | Microtubule-associated protein 1A                               | Biological Replicate 1 Only | 1                           |
| G3I2C8     | Muscarinic acetylcholine receptor                               | Biological Replicate 1 Only | 1                           |
| G3GRE9     | Myb-binding protein 1A                                          | Biological Replicate 1 Only | 1                           |
| G3HTA4     | Myosin-14                                                       | Biological Replicate 1 Only | 1                           |
| G3GYK6     | Myosin-binding protein C, cardiac-type                          | Biological Replicate 1 Only | 1                           |
| G3H629     | Neurexin-3-alpha                                                | Biological Replicate 1 Only | 1                           |
| G3HDG3     | Neuroguidin                                                     | Biological Replicate 1 Only | 1                           |
| G3II61     | Neurotrypsin                                                    | Biological Replicate 1 Only | 1                           |
| G3GU05     | NKG2D ligand 4                                                  | Biological Replicate 1 Only | 1                           |
| G3IBB9     | Nodal modulator 1                                               | Biological Replicate 1 Only | 1                           |
| G3HAH7     | Nuclear receptor subfamily 1 group I member 2                   | Biological Replicate 1 Only | 1                           |

| Uniprot ID | Protein Name                                              | Biological Replicate        | Number of Modified Peptides |
|------------|-----------------------------------------------------------|-----------------------------|-----------------------------|
| G3H4S1     | Nuclear receptor-interacting protein 1                    | Biological Replicate 1 Only | 1                           |
| G3GR93     | Nucleolar GTP-binding protein 1                           | Biological Replicate 1 Only | 1                           |
| G3HB02     | Nucleolar protein 10                                      | Biological Replicate 1 Only | 1                           |
| G3H46      | Nucleophosmin                                             | Biological Replicate 1 Only | 1                           |
| G3I8L7     | Olfactory receptor                                        | Biological Replicate 1 Only | 1                           |
| G3GTW5     | Opioid-binding protein/cell adhesion molecule             | Biological Replicate 1 Only | 1                           |
| G3HDG6     | Paraspeckle component 1                                   | Biological Replicate 1 Only | 1                           |
| G3IPM4     | Peptidase S1 domain-containing protein                    | Biological Replicate 1 Only | 1                           |
| G3HH47     | Peptidyl-prolyl cis-trans isomerase                       | Biological Replicate 1 Only | 1                           |
| G3GYP9     | Peptidyl-prolyl cis-trans isomerase                       | Biological Replicate 1 Only | 1                           |
| G3GZB3     | Pericentriolar material 1 protein                         | Biological Replicate 1 Only | 1                           |
| G3HCG3     | Perilipin                                                 | Biological Replicate 1 Only | 1                           |
| G3HVL1     | Peroxiredoxin-1                                           | Biological Replicate 1 Only | 1                           |
| G3H6X2     | Phosphatase and actin regulator                           | Biological Replicate 1 Only | 1                           |
| G3HLM6     | Phosphoglycerate mutase                                   | Biological Replicate 1 Only | 1                           |
| G3H533     | Plasminogen activator inhibitor 1 RNA-binding protein     | Biological Replicate 1 Only | 1                           |
| G3HGL5     | Pleckstrin-like domain-containing family A member 5       | Biological Replicate 1 Only | 1                           |
| G3I3J2     | Protachykinin-1                                           | Biological Replicate 1 Only | 1                           |
| G3GWR8     | Proteasome endopeptidase complex                          | Biological Replicate 1 Only | 1                           |
| G3HYX3     | Protein BTG1                                              | Biological Replicate 1 Only | 1                           |
| G3HUI7     | Protein disulfide-isomerase TMX3                          | Biological Replicate 1 Only | 1                           |
| G3HWT7     | Protein dopey-2                                           | Biological Replicate 1 Only | 1                           |
| G3HM99     | Protein ERGIC-53                                          | Biological Replicate 1 Only | 1                           |
| G3IG31     | Protein FAM40A                                            | Biological Replicate 1 Only | 1                           |
| G3GWU9     | Protein FAM5C                                             | Biological Replicate 1 Only | 1                           |
| G3H5W5     | Protein HEXIM1                                            | Biological Replicate 1 Only | 1                           |
| G3GW17     | Protein phosphatase 1 regulatory subunit 3A               | Biological Replicate 1 Only | 1                           |
| G3HR99     | Protein phosphatase Slingshot-like 2                      | Biological Replicate 1 Only | 1                           |
| G3IB34     | Protein RRP5-like                                         | Biological Replicate 1 Only | 1                           |
| G3HF61     | Protein strawberry notch-like 2                           | Biological Replicate 1 Only | 1                           |
| G3HM65     | Protein Wiz                                               | Biological Replicate 1 Only | 1                           |
| G3HIT0     | Protein ZNF365                                            | Biological Replicate 1 Only | 1                           |
| G3GYJ4     | Prothrombin                                               | Biological Replicate 1 Only | 1                           |
| G3HL18     | Prothymosin alpha                                         | Biological Replicate 1 Only | 1                           |
| G3H6A7     | Putative global transcription activator SNF2L4            | Biological Replicate 1 Only | 1                           |
| G3HTI7     | Putative G-protein coupled receptor 116                   | Biological Replicate 1 Only | 1                           |
| G3H5V2     | Putative G-protein coupled receptor 179                   | Biological Replicate 1 Only | 1                           |
| G3HC41     | Pyruvate kinase                                           | Biological Replicate 1 Only | 1                           |
| G3H6B4     | Queuine tRNA-ribosyltransferase                           | Biological Replicate 1 Only | 1                           |
| G3GYD2     | Rab GTPase-binding effector protein 1                     | Biological Replicate 1 Only | 1                           |
| G3I4V4     | Ran-binding protein 6                                     | Biological Replicate 1 Only | 1                           |
| G3H937     | Ran-specific GTPase-activating protein                    | Biological Replicate 1 Only | 1                           |
| G3HKG8     | Ras GTPase-activating protein-binding protein 2           | Biological Replicate 1 Only | 1                           |
| G3IF62     | Ras GTPase-activating-like protein IQGAP1                 | Biological Replicate 1 Only | 1                           |
| G3HP03     | Ras suppressor protein 1                                  | Biological Replicate 1 Only | 1                           |
| G3HX83     | Ras-related protein Rab-14                                | Biological Replicate 1 Only | 1                           |
| G3HC20     | Reticulocalbin-3                                          | Biological Replicate 1 Only | 1                           |
| G3HVV8     | Rho guanine nucleotide exchange factor 18                 | Biological Replicate 1 Only | 1                           |
| G3HJ95     | RING finger and transmembrane domain-containing protein 1 | Biological Replicate 1 Only | 1                           |
| G3ICM3     | RING finger protein 207                                   | Biological Replicate 1 Only | 1                           |

| Uniprot ID | Protein Name                                                          | Biological Replicate        | Number of Modified Peptides |
|------------|-----------------------------------------------------------------------|-----------------------------|-----------------------------|
| G3HAR3     | RNA-binding protein 12                                                | Biological Replicate 1 Only | 1                           |
| G3HAG9     | RNA-binding protein EWS                                               | Biological Replicate 1 Only | 1                           |
| G3IBF1     | RNA-binding protein FUS                                               | Biological Replicate 1 Only | 1                           |
| G3IEX6     | Rootletin                                                             | Biological Replicate 1 Only | 1                           |
| G3I220     | RRP15-like protein                                                    | Biological Replicate 1 Only | 1                           |
| G3GX56     | Serine/threonine-protein kinase LMTK1                                 | Biological Replicate 1 Only | 1                           |
| G3GW88     | Serine/threonine-protein phosphatase                                  | Biological Replicate 1 Only | 1                           |
|            | Serine/threonine-protein phosphatase 2A regulatory subunit B" subunit |                             |                             |
| G3IGB2     | gamma                                                                 | Biological Replicate 1 Only | 1                           |
| G3HPA2     | Short transient receptor potential channel 5                          | Biological Replicate 1 Only | 1                           |
| G3IAU0     | SMC hinge domain-containing protein                                   | Biological Replicate 1 Only | 1                           |
| G3I4L3     | Spectrin beta chain, brain 2                                          | Biological Replicate 1 Only | 1                           |
| G3I9Q8     | SPIN4                                                                 | Biological Replicate 1 Only | 1                           |
| G3HZH3     | Spliceosome RNA helicase BAT1                                         | Biological Replicate 1 Only | 1                           |
| G3GZ90     | Splicing factor, arginine/serine-rich 7                               | Biological Replicate 1 Only | 1                           |
| G3HQN1     | Stabilin-2                                                            | Biological Replicate 1 Only | 1                           |
| G3IGI9     | STE20-like serine/threonine-protein kinase                            | Biological Replicate 1 Only | 1                           |
| G3IBR7     | Sterol regulatory element-binding protein 2                           | Biological Replicate 1 Only | 1                           |
| G3H FY6    | Stromal cell-derived factor 2-like protein 1                          | Biological Replicate 1 Only | 1                           |
| G3GUV4     | Stromelysin-2                                                         | Biological Replicate 1 Only | 1                           |
| G3I9F1     | Succinate dehydrogenase flavoprotein subunit, mitochondrial           | Biological Replicate 1 Only | 1                           |
| G3HN40     | Supervillin                                                           | Biological Replicate 1 Only | 1                           |
| G3II75     | Synaptonemal complex central element protein 1                        | Biological Replicate 1 Only | 1                           |
| G3HYT6     | Tau-tubulin kinase 1                                                  | Biological Replicate 1 Only | 1                           |
| G3HP60     | TBC1 domain family member 9B                                          | Biological Replicate 1 Only | 1                           |
| G3I1Q3     | Tetratricopeptide repeat protein 5                                    | Biological Replicate 1 Only | 1                           |
| G3GS14     | TMEM43                                                                | Biological Replicate 1 Only | 1                           |
| G3H2P2     | TMPPE                                                                 | Biological Replicate 1 Only | 1                           |
| G3GRB7     | Toll-like receptor 5                                                  | Biological Replicate 1 Only | 1                           |
| G3HE52     | Transcription factor BTF3                                             | Biological Replicate 1 Only | 1                           |
| G3I0G1     | Transcription factor BTF3                                             | Biological Replicate 1 Only | 1                           |
| G3HQ28     | Transient receptor potential cation channel subfamily M member 1      | Biological Replicate 1 Only | 1                           |
| G3H8T8     | Transmembrane protein C20orf123-like                                  | Biological Replicate 1 Only | 1                           |
| G3HIU2     | Transportin-1                                                         | Biological Replicate 1 Only | 1                           |
| G3HS38     | Treacle protein                                                       | Biological Replicate 1 Only | 1                           |
| G3I216     | Triosephosphate isomerase                                             | Biological Replicate 1 Only | 1                           |
| G3HVV3     | Tripartite motif-containing protein 10                                | Biological Replicate 1 Only | 1                           |
| G3H4E2     | tRNA modification GTPase GTPBP3, mitochondrial                        | Biological Replicate 1 Only | 1                           |
| G3H4I2     | Tropomyosin alpha-1 chain-like protein                                | Biological Replicate 1 Only | 1                           |
| G3HIX6     | Tryptophanyl-tRNA synthetase, cytoplasmic                             | Biological Replicate 1 Only | 1                           |
| G3GR79     | Tubulin alpha chain                                                   | Biological Replicate 1 Only | 1                           |
| G3H552     | Tyrosine-protein kinase                                               | Biological Replicate 1 Only | 1                           |
| G3IBG3     | Ubiquitin activating enzyme E1                                        | Biological Replicate 1 Only | 1                           |
| G3GVT5     | Ubiquitin carboxyl-terminal hydrolase                                 | Biological Replicate 1 Only | 1                           |
| G3GZE0     | Ubiquitin carboxyl-terminal hydrolase 1                               | Biological Replicate 1 Only | 1                           |
| G3H1S2     | UDP-glucose:glycoprotein glucosyltransferase 1                        | Biological Replicate 1 Only | 1                           |
| G3GSP0     | UMPS                                                                  | Biological Replicate 1 Only | 1                           |
| G3GU47     | UPF0454 protein C12orf49-like                                         | Biological Replicate 1 Only | 1                           |
| G3IEY9     | Utrophin                                                              | Biological Replicate 1 Only | 1                           |
| G3I7E8     | WD repeat-containing protein 60                                       | Biological Replicate 1 Only | 1                           |

| Uniprot ID | Protein Name                                            | Biological Replicate        | Number of Modified Peptides |
|------------|---------------------------------------------------------|-----------------------------|-----------------------------|
| G3IP37     | WD repeat-containing protein 67                         | Biological Replicate 1 Only | 1                           |
| G3ILL8     | WD repeat-containing protein C10orf79                   | Biological Replicate 1 Only | 1                           |
| G3HEX9     | Zinc finger protein DZIP1L                              | Biological Replicate 1 Only | 1                           |
| G3HCM3     | Zinc finger protein Rlf                                 | Biological Replicate 1 Only | 1                           |
| G3HUR8     | 10 kDa heat shock protein, mitochondrial                | Biological Replicate 2 Only | 1                           |
| G3I7W5     | 25-hydroxycholesterol 7-alpha-hydroxylase               | Biological Replicate 2 Only | 1                           |
| G3IHM5     | 26S proteasome non-ATPase regulatory subunit 4          | Biological Replicate 2 Only | 1                           |
| G3IMD1     | 40S ribosomal protein S26                               | Biological Replicate 2 Only | 1                           |
| G3HTK4     | 52 kDa repressor of the inhibitor of the protein kinase | Biological Replicate 2 Only | 1                           |
| G3HJM9     | 5'-nucleotidase domain-containing protein 1             | Biological Replicate 2 Only | 1                           |
| G3IDC2     | 60S acidic ribosomal protein P1                         | Biological Replicate 2 Only | 1                           |
| G3HBE9     | 60S ribosomal protein L13a                              | Biological Replicate 2 Only | 1                           |
| G3HAQ2     | 60S ribosomal protein L18                               | Biological Replicate 2 Only | 1                           |
| G3HE04     | 60S ribosomal protein L5                                | Biological Replicate 2 Only | 1                           |
| G3HF38     | 60S ribosomal protein L8                                | Biological Replicate 2 Only | 1                           |
| G3HVI3     | Actin-binding WH2 containing protein                    | Biological Replicate 2 Only | 1                           |
| G3IA30     | ADP-ribosylation factor 4                               | Biological Replicate 2 Only | 2                           |
| G3I088     | A-kinase anchor protein 9                               | Biological Replicate 2 Only | 1                           |
| G3HY68     | Alpha-enolase                                           | Biological Replicate 2 Only | 1                           |
| G3I6I6     | Alpha-enolase                                           | Biological Replicate 2 Only | 1                           |
| G3HLY7     | Amino acid transporter                                  | Biological Replicate 2 Only | 1                           |
| G3HDH1     | Ankyrin repeat domain-containing protein 27             | Biological Replicate 2 Only | 1                           |
| G3HZW3     | Annexin                                                 | Biological Replicate 2 Only | 1                           |
| G3H219     | AP-1 complex subunit gamma                              | Biological Replicate 2 Only | 1                           |
| G3HSX3     | Aspartate aminotransferase                              | Biological Replicate 2 Only | 1                           |
| G3HGF4     | AT-hook-containing transcription factor                 | Biological Replicate 2 Only | 1                           |
| G3IBD6     | ATP-dependent RNA helicase DDX18                        | Biological Replicate 2 Only | 1                           |
| G3H170     | Basigin                                                 | Biological Replicate 2 Only | 1                           |
| G3H354     | B-cell receptor-associated protein 31                   | Biological Replicate 2 Only | 4                           |
| G3I630     | Beta-adducin                                            | Biological Replicate 2 Only | 1                           |
| G3I8G1     | Brain-specific angiogenesis inhibitor 1                 | Biological Replicate 2 Only | 1                           |
| G3GUS2     | CAD protein                                             | Biological Replicate 2 Only | 1                           |
| G3I4H6     | Calmodulin                                              | Biological Replicate 2 Only | 1                           |
| G3GXT7     | Catenin alpha-1                                         | Biological Replicate 2 Only | 1                           |
| G3IAI7     | CNPY2                                                   | Biological Replicate 2 Only | 1                           |
| G3GRD6     | Coatamer subunit beta                                   | Biological Replicate 2 Only | 1                           |
| G3H3B4     | Cohesin subunit SA-2                                    | Biological Replicate 2 Only | 1                           |
| G3HN72     | Coiled-coil domain-containing protein 22                | Biological Replicate 2 Only | 1                           |
| G3HWA3     | Delta-1-pyrroline-5-carboxylate synthase                | Biological Replicate 2 Only | 1                           |
| G3HLZ9     | DENN domain-containing protein 2C                       | Biological Replicate 2 Only | 1                           |
| G3H3C6     | Desmin                                                  | Biological Replicate 2 Only | 1                           |
| G3GZ37     | Disks large-associated protein 2                        | Biological Replicate 2 Only | 1                           |
| G3ICZ6     | DMRT-like domain-containing protein                     | Biological Replicate 2 Only | 1                           |
| G3I322     | DNA replication licensing factor MCM9                   | Biological Replicate 2 Only | 1                           |
| G3I003     | DNA topoisomerase                                       | Biological Replicate 2 Only | 1                           |
| G3IFY1     | Drebrin                                                 | Biological Replicate 2 Only | 1                           |
| G3I1S5     | Drebrin-like protein                                    | Biological Replicate 2 Only | 1                           |
| G3I911     | Dual specificity protein phosphatase CDC14B             | Biological Replicate 2 Only | 1                           |
| G3IBN9     | Dynein heavy chain 7, axonemal                          | Biological Replicate 2 Only | 1                           |
| G3HP27     | Dysferlin                                               | Biological Replicate 2 Only | 1                           |

| Uniprot ID | Protein Name                                             | Biological Replicate        | Number of Modified Peptides |
|------------|----------------------------------------------------------|-----------------------------|-----------------------------|
| G3H646     | E3 ubiquitin-protein ligase DZIP3                        | Biological Replicate 2 Only | 1                           |
| G3GVA0     | E3 ubiquitin-protein ligase HUWE1                        | Biological Replicate 2 Only | 1                           |
| G3HD10     | Elongation factor 1-beta                                 | Biological Replicate 2 Only | 1                           |
| G3HXX8     | Envelope glycoprotein                                    | Biological Replicate 2 Only | 1                           |
| G3IGB9     | Erythroid differentiation-related factor 1               | Biological Replicate 2 Only | 1                           |
| G3HSE4     | Eukaryotic translation initiation factor 6               | Biological Replicate 2 Only | 1                           |
| G3HYJ8     | Exportin-5                                               | Biological Replicate 2 Only | 2                           |
| G3I0Q1     | Extracellular sulfatase                                  | Biological Replicate 2 Only | 1                           |
| G3H3E6     | FAST kinase domain-containing protein 5                  | Biological Replicate 2 Only | 1                           |
| G3HYU7     | F-box only protein 8                                     | Biological Replicate 2 Only | 1                           |
| G3GZN0     | Ferritin                                                 | Biological Replicate 2 Only | 1                           |
| G3H8Y6     | FH1/FH2 domain-containing protein 3                      | Biological Replicate 2 Only | 1                           |
| G3I039     | Fibroblast growth factor receptor substrate 3            | Biological Replicate 2 Only | 1                           |
| G3I9N7     | Fructose-bisphosphate aldolase                           | Biological Replicate 2 Only | 1                           |
| G3HJW9     | Gamma-tubulin complex component                          | Biological Replicate 2 Only | 1                           |
| G3IBN8     | GAPDH                                                    | Biological Replicate 2 Only | 1                           |
| G3GX50     | General transcription factor 3C polypeptide 2            | Biological Replicate 2 Only | 1                           |
| G3H000     | GFOD1                                                    | Biological Replicate 2 Only | 1                           |
| G3HB73     | Glutathione peroxidase 2                                 | Biological Replicate 2 Only | 1                           |
| G3GR73     | Glyceraldehyde-3-phosphate dehydrogenase                 | Biological Replicate 2 Only | 1                           |
| G3IN18     | Glyceraldehyde-3-phosphate dehydrogenase                 | Biological Replicate 2 Only | 1                           |
| G3HBG8     | Glyceraldehyde-3-phosphate dehydrogenase                 | Biological Replicate 2 Only | 1                           |
| G3I8F7     | Glyceraldehyde-3-phosphate dehydrogenase                 | Biological Replicate 2 Only | 1                           |
| G3GSD8     | Glyceraldehyde-3-phosphate dehydrogenase                 | Biological Replicate 2 Only | 1                           |
| G3I8F6     | Glyceraldehyde-3-phosphate dehydrogenase                 | Biological Replicate 2 Only | 1                           |
| G3ICI3     | Glyceraldehyde-3-phosphate dehydrogenase                 | Biological Replicate 2 Only | 1                           |
| G3IHS0     | Glyceraldehyde-3-phosphate dehydrogenase                 | Biological Replicate 2 Only | 1                           |
| G3H740     | Glyceraldehyde-3-phosphate dehydrogenase                 | Biological Replicate 2 Only | 1                           |
| G3IIZ6     | Golgi membrane protein 1                                 | Biological Replicate 2 Only | 1                           |
| G3HRL6     | Golgin subfamily A member 4                              | Biological Replicate 2 Only | 1                           |
| G3HQG6     | Guanine nucleotide-binding protein subunit alpha-11      | Biological Replicate 2 Only | 1                           |
| G3IKD5     | Heat shock cognate 71 kDa protein                        | Biological Replicate 2 Only | 2                           |
| G3HQH3     | Heat shock protein HSP 90-alpha                          | Biological Replicate 2 Only | 1                           |
| G3GXT2     | Heat shock protein HSP 90-alpha                          | Biological Replicate 2 Only | 1                           |
| G3I2Y1     | Histone H2A                                              | Biological Replicate 2 Only | 1                           |
| G3H2B7     | Histone-lysine N-methyltransferase                       | Biological Replicate 2 Only | 1                           |
| G3HBG0     | HNRNPR                                                   | Biological Replicate 2 Only | 1                           |
| G3HZR9     | Homer protein-like 1                                     | Biological Replicate 2 Only | 1                           |
| G3HYW8     | Inhibitor of nuclear factor kappa-B kinase subunit alpha | Biological Replicate 2 Only | 1                           |
| G3HS15     | IQ domain-containing protein LRRIQ1                      | Biological Replicate 2 Only | 1                           |
| G3ILT7     | Keratin, type I cytoskeletal 10                          | Biological Replicate 2 Only | 1                           |
| G3GY44     | Keratin, type I cytoskeletal 15                          | Biological Replicate 2 Only | 1                           |
| G3HV39     | Keratin, type I cytoskeletal 17                          | Biological Replicate 2 Only | 1                           |
| G3I8G0     | Keratin, type I cytoskeletal 19                          | Biological Replicate 2 Only | 2                           |
| G3I6E9     | Keratin, type I cytoskeletal 42                          | Biological Replicate 2 Only | 1                           |
| G3IFS9     | Keratin, type II cytoskeletal 2 oral                     | Biological Replicate 2 Only | 1                           |
| G3H2Z7     | Keratin, type II cytoskeletal 4                          | Biological Replicate 2 Only | 2                           |
| G3H208     | Keratin, type II cytoskeletal 6A                         | Biological Replicate 2 Only | 1                           |
| G3IBN5     | Keratin, type II cytoskeletal 71                         | Biological Replicate 2 Only | 1                           |
| G3HXR4     | Kinesin-like protein                                     | Biological Replicate 2 Only | 1                           |



| Uniprot ID | Protein Name                                                      | Biological Replicate        | Number of Modified Peptides |
|------------|-------------------------------------------------------------------|-----------------------------|-----------------------------|
| G3IF29     | Leucine-rich repeat-containing protein 26                         | Biological Replicate 2 Only | 1                           |
| G3IM72     | Leucine-rich repeat-containing protein 59                         | Biological Replicate 2 Only | 1                           |
| G3I0S4     | Lin-28-like A                                                     | Biological Replicate 2 Only | 1                           |
| G3HBD3     | L-lactate dehydrogenase                                           | Biological Replicate 2 Only | 2                           |
| G3I2Z3     | Lysine-specific demethylase 2A                                    | Biological Replicate 2 Only | 1                           |
| G3H2X6     | Metalloproteinase inhibitor 2                                     | Biological Replicate 2 Only | 1                           |
| G3HM47     | Microtubule-actin cross-linking factor 1, isoform 4               | Biological Replicate 2 Only | 1                           |
| G3GUU5     | Microtubule-associated protein 6                                  | Biological Replicate 2 Only | 1                           |
| G3GT01     | MIF4G domain-containing protein                                   | Biological Replicate 2 Only | 1                           |
| G3H0U6     | Mitochondrial import receptor subunit TOM22-like                  | Biological Replicate 2 Only | 2                           |
| G3H0G2     | MKI67 FHA domain-interacting nucleolar phosphoprotein             | Biological Replicate 2 Only | 1                           |
| G3I2D5     | Multidrug resistance-associated protein 5                         | Biological Replicate 2 Only | 1                           |
| G3HF20     | Mutated melanoma-associated antigen 1                             | Biological Replicate 2 Only | 1                           |
| G3I621     | Myosin-10                                                         | Biological Replicate 2 Only | 1                           |
| G3GSK3     | Myosin-8                                                          | Biological Replicate 2 Only | 1                           |
| G3I6Z5     | Myosin-XVIIIa                                                     | Biological Replicate 2 Only | 1                           |
| G3IEM6     | NACHT, LRR and PYD domains-containing protein 2                   | Biological Replicate 2 Only | 1                           |
| G3HJF7     | Neuromodulin                                                      | Biological Replicate 2 Only | 1                           |
| G3HHZ0     | Neuron navigator 3                                                | Biological Replicate 2 Only | 1                           |
| G3GR94     | Non-specific serine/threonine protein kinase                      | Biological Replicate 2 Only | 1                           |
| G3H8F9     | Nucleoside diphosphate kinase                                     | Biological Replicate 2 Only | 1                           |
| G3I613     | Obscurin-like protein 1                                           | Biological Replicate 2 Only | 1                           |
| G3IG36     | Olfactory receptor                                                | Biological Replicate 2 Only | 1                           |
| G3HNNJ6    | Olfactory receptor                                                | Biological Replicate 2 Only | 2                           |
| G3H9M6     | Olfactory receptor 2T2                                            | Biological Replicate 2 Only | 1                           |
| G3HNB2     | OMD                                                               | Biological Replicate 2 Only | 1                           |
| G3GUL3     | PDX1                                                              | Biological Replicate 2 Only | 1                           |
| G3HZA3     | Peptidylprolyl isomerase                                          | Biological Replicate 2 Only | 1                           |
| G3IDT6     | Peptidylprolyl isomerase                                          | Biological Replicate 2 Only | 1                           |
| G3HUR1     | PH and SEC7 domain-containing protein 2                           | Biological Replicate 2 Only | 1                           |
| G3I129     | Poly-binding protein 2                                            | Biological Replicate 2 Only | 1                           |
| G3H7C8     | Poly-binding protein 3                                            | Biological Replicate 2 Only | 1                           |
| G3HAG8     | Potassium voltage-gated channel subfamily H member 2              | Biological Replicate 2 Only | 1                           |
| G3I2J8     | Proteasome subunit alpha type                                     | Biological Replicate 2 Only | 1                           |
| G3GW11     | Protein ALO17                                                     | Biological Replicate 2 Only | 1                           |
| G3HEZ0     | Protein disulfide-isomerase A3                                    | Biological Replicate 2 Only | 1                           |
| G3HMB9     | Protein disulfide-isomerase A4                                    | Biological Replicate 2 Only | 1                           |
| G3H7T9     | Protein DJ-1                                                      | Biological Replicate 2 Only | 1                           |
| G3HWD0     | Protein kinase C and casein kinase substrate in neurons protein 2 | Biological Replicate 2 Only | 1                           |
| G3H439     | Protein naked cuticle-like 1                                      | Biological Replicate 2 Only | 1                           |
| G3H5M2     | Protein O-mannosyl-transferase 2                                  | Biological Replicate 2 Only | 1                           |
| G3GSU4     | Protein phosphatase 1G                                            | Biological Replicate 2 Only | 3                           |
| G3IEU2     | Protein sidekick-2                                                | Biological Replicate 2 Only | 2                           |
| G3I411     | Protein transport protein sec16                                   | Biological Replicate 2 Only | 1                           |
| G3H204     | Proteolipid protein 2                                             | Biological Replicate 2 Only | 1                           |
| G3HXT3     | Protocadherin-7                                                   | Biological Replicate 2 Only | 1                           |
| G3GTI1     | Putative ATP-dependent RNA helicase DDX60                         | Biological Replicate 2 Only | 1                           |
| G3HGA3     | Putative E3 ubiquitin-protein ligase MYCBP2                       | Biological Replicate 2 Only | 1                           |
| G3HCD9     | Putative UPF0575 protein C19orf67 like protein                    | Biological Replicate 2 Only | 1                           |
| G3HZU7     | Pyrin                                                             | Biological Replicate 2 Only | 1                           |

| Uniprot ID | Protein Name                                       | Biological Replicate        | Number of Modified Peptides |
|------------|----------------------------------------------------|-----------------------------|-----------------------------|
| G3HMQ0     | Rab GDP dissociation inhibitor                     | Biological Replicate 2 Only | 1                           |
| G3HF72     | Ras GTPase-activating-like protein IQGAP3          | Biological Replicate 2 Only | 1                           |
| G3HG79     | Rho guanine nucleotide exchange factor 2           | Biological Replicate 2 Only | 1                           |
| G3GZ13     | Ribosome-binding protein 1                         | Biological Replicate 2 Only | 1                           |
| G3GSW3     | RING finger protein 160                            | Biological Replicate 2 Only | 1                           |
| G3IKI7     | RUN and FYVE domain-containing protein 4           | Biological Replicate 2 Only | 1                           |
| G3HIP2     | RUN domain-containing protein 1                    | Biological Replicate 2 Only | 1                           |
| G3HI28     | RuvB-like helicase                                 | Biological Replicate 2 Only | 1                           |
| G3IKJ2     | Secretory carrier-associated membrane protein      | Biological Replicate 2 Only | 1                           |
| G3IPN2     | Sentrin-specific protease 5                        | Biological Replicate 2 Only | 2                           |
| G3H134     | Septin-8                                           | Biological Replicate 2 Only | 1                           |
| G3GVI0     | Serine/threonine-protein kinase 31                 | Biological Replicate 2 Only | 1                           |
| G3HK64     | Serine/threonine-protein kinase WNK4               | Biological Replicate 2 Only | 1                           |
| G3I6F2     | S-glutathione dehydrogenase                        | Biological Replicate 2 Only | 1                           |
| G3H9N8     | SHC-transforming protein 1                         | Biological Replicate 2 Only | 1                           |
| G3HUM7     | Signal recognition particle 19 kDa protein         | Biological Replicate 2 Only | 1                           |
| G3HC68     | Sodium/potassium-transporting ATPase subunit alpha | Biological Replicate 2 Only | 1                           |
| G3HC45     | Splicing factor 3A subunit 3                       | Biological Replicate 2 Only | 1                           |
| G3HG26     | STE20-related kinase adapter protein alpha         | Biological Replicate 2 Only | 1                           |
| G3INN8     | Stress-70 protein, mitochondrial                   | Biological Replicate 2 Only | 1                           |
| G3IG05     | Stress-induced-phosphoprotein 1                    | Biological Replicate 2 Only | 1                           |
| G3IIX1     | Structural maintenance of chromosomes protein 3    | Biological Replicate 2 Only | 1                           |
| G3HIC5     | Suppressor of IKK-epsilon protein A                | Biological Replicate 2 Only | 1                           |
| G3HPW6     | Synaptotagmin-like protein 2                       | Biological Replicate 2 Only | 1                           |
| G3I877     | Syntaxin-12                                        | Biological Replicate 2 Only | 1                           |
| G3I7Y5     | Target of Myb protein 1                            | Biological Replicate 2 Only | 1                           |
| G3HRP2     | Tetraspanin                                        | Biological Replicate 2 Only | 1                           |
| G3H6P6     | Tetratricopeptide repeat protein 8                 | Biological Replicate 2 Only | 1                           |
| G3HY79     | Transcriptional regulator Kaiso                    | Biological Replicate 2 Only | 1                           |
| G3GXU1     | Transforming protein RhoA                          | Biological Replicate 2 Only | 1                           |
| G3HM98     | Transketolase                                      | Biological Replicate 2 Only | 1                           |
| G3H2L3     | Tripartite motif-containing protein 60             | Biological Replicate 2 Only | 1                           |
| G3HSR5     | Tubby-related protein 4                            | Biological Replicate 2 Only | 1                           |
| G3I255     | Tubulin alpha chain                                | Biological Replicate 2 Only | 1                           |
| G3IHW0     | Tubulin alpha chain                                | Biological Replicate 2 Only | 1                           |
| G3HNB8     | TYMS                                               | Biological Replicate 2 Only | 1                           |
| G3IC35     | Tyrosine-protein phosphatase non-receptor type 13  | Biological Replicate 2 Only | 1                           |
| G3I9H0     | Ubiquitin                                          | Biological Replicate 2 Only | 1                           |
| G3GTE7     | von Willebrand factor                              | Biological Replicate 2 Only | 1                           |
| G3IGN4     | VPS10 domain-containing receptor SorCS3            | Biological Replicate 2 Only | 1                           |
| G3I108     | Zinc finger protein PLAG1                          | Biological Replicate 2 Only | 1                           |
| G3HCL2     | 14-3-3 protein beta/alpha                          | Both Biological Replicates  | 2                           |
| G3I3C7     | 14-3-3 protein epsilon                             | Both Biological Replicates  | 2                           |
| G3I8R9     | 14-3-3 protein zeta/delta                          | Both Biological Replicates  | 3                           |
| G3IAQ0     | 40S ribosomal protein S3                           | Both Biological Replicates  | 2                           |
| G3IHP6     | 60 kDa heat shock protein, mitochondrial           | Both Biological Replicates  | 2                           |
| G3HDV5     | ACTB                                               | Both Biological Replicates  | 2                           |
| G3H2T7     | Actin, alpha cardiac muscle 1                      | Both Biological Replicates  | 2                           |
| G3IKS8     | Actin, gamma-enteric smooth muscle                 | Both Biological Replicates  | 2                           |
| G3IAG4     | Alpha-actinin-1                                    | Both Biological Replicates  | 2                           |

| Uniprot ID | Protein Name                                            | Biological Replicate       | Number of Modified Peptides |
|------------|---------------------------------------------------------|----------------------------|-----------------------------|
| G3I5T3     | Alpha-enolase                                           | Both Biological Replicates | 2                           |
| G3HQM6     | Alpha-enolase                                           | Both Biological Replicates | 2                           |
| G3HR98     | Anionic trypsin-2-like protein                          | Both Biological Replicates | 2                           |
| G3I2Q7     | ANKRD37                                                 | Both Biological Replicates | 3                           |
| G3H1K9     | Annexin                                                 | Both Biological Replicates | 3                           |
| G3IG81     | Beta-actin-like protein 2                               | Both Biological Replicates | 2                           |
| G3H3Q1     | Calreticulin                                            | Both Biological Replicates | 3                           |
| G3GVX1     | CLIP-associating protein 2                              | Both Biological Replicates | 2                           |
| G3GWT5     | Cytoplasmic dynein 1 heavy chain 1                      | Both Biological Replicates | 2                           |
| G3HLS2     | EF-hand calcium-binding domain-containing protein 5     | Both Biological Replicates | 3                           |
| G3HDS3     | Elongation factor 1-alpha 1                             | Both Biological Replicates | 2                           |
| G3I968     | Elongation factor 1-alpha 1                             | Both Biological Replicates | 2                           |
| G3H2I6     | Elongation factor 1-delta                               | Both Biological Replicates | 3                           |
| G3HXU0     | Elongation factor 2                                     | Both Biological Replicates | 2                           |
| G3HPV7     | Endoplasmic reticulum chaperone BiP                     | Both Biological Replicates | 3                           |
| G3HKZ1     | Endoplasmic                                             | Both Biological Replicates | 2                           |
| G3H352     | EZR                                                     | Both Biological Replicates | 2                           |
| G3HHR3     | Fructose-bisphosphate aldolase                          | Both Biological Replicates | 2                           |
| G3HCX8     | Galectin                                                | Both Biological Replicates | 3                           |
| G3IEX2     | Glyceraldehyde-3-phosphate dehydrogenase                | Both Biological Replicates | 2                           |
| G3HH39     | Glyceraldehyde-3-phosphate dehydrogenase                | Both Biological Replicates | 2                           |
| G3HL13     | Glyceraldehyde-3-phosphate dehydrogenase                | Both Biological Replicates | 4                           |
| G3HAY0     | GRIP1-associated protein 1                              | Both Biological Replicates | 2                           |
| G3HNC4     | H-2 class I histocompatibility antigen, D-D alpha chain | Both Biological Replicates | 2                           |
| G3HXM1     | Heat shock 70 kDa protein 1L                            | Both Biological Replicates | 2                           |
| G3IOW1     | Heat shock cognate 71 kDa protein                       | Both Biological Replicates | 2                           |
| G3IJ02     | Heterogeneous nuclear ribonucleoproteins A2/B1          | Both Biological Replicates | 2                           |
| G3H7Z2     | Histone H2A                                             | Both Biological Replicates | 3                           |
| G3IPU3     | Histone H2A                                             | Both Biological Replicates | 2                           |
| G3I4Z7     | Histone H2A                                             | Both Biological Replicates | 3                           |
| G3H5Q0     | Histone H2A                                             | Both Biological Replicates | 5                           |
| G3HFP1     | Histone H2A                                             | Both Biological Replicates | 2                           |
| G3IDL7     | Histone H2B                                             | Both Biological Replicates | 5                           |
| G3HHM2     | Histone H3                                              | Both Biological Replicates | 3                           |
| G3HYJ9     | Histone H3.1t                                           | Both Biological Replicates | 2                           |
| G3GXA9     | Histone H4                                              | Both Biological Replicates | 3                           |
| G3HBJ3     | Intercellular adhesion molecule 1                       | Both Biological Replicates | 2                           |
| G3GU92     | Keratin, type I cytoskeletal 14                         | Both Biological Replicates | 2                           |
| G3GRQ1     | Keratin, type I cytoskeletal 27                         | Both Biological Replicates | 4                           |
| G3HMD1     | Keratin, type II cytoskeletal 1b                        | Both Biological Replicates | 3                           |
| G3I7J6     | Keratin, type II cytoskeletal 2 epidermal               | Both Biological Replicates | 2                           |
| G3HWN8     | Kinesin-like protein KIF27                              | Both Biological Replicates | 2                           |
| G3H154     | Leucine-rich repeat flightless-interacting protein 1    | Both Biological Replicates | 2                           |
| G3HQN3     | Leucine-rich repeat-containing protein KIAA1731         | Both Biological Replicates | 2                           |
| G3HMMW8    | Lupus La protein-like                                   | Both Biological Replicates | 2                           |
| G3HQP8     | Moesin                                                  | Both Biological Replicates | 4                           |
| G3HN02     | Mucin-5B                                                | Both Biological Replicates | 2                           |
| G3IKI6     | Myosin-11                                               | Both Biological Replicates | 3                           |
| Q9ERF7     | Myosin-9                                                | Both Biological Replicates | 2                           |
| G3I3L6     | NEDD4-binding protein 2                                 | Both Biological Replicates | 2                           |

| Uniprot ID | Protein Name                                      | Biological Replicate       | Number of Modified Peptides |
|------------|---------------------------------------------------|----------------------------|-----------------------------|
| G3HV53     | Negative elongation factor D                      | Both Biological Replicates | 2                           |
| G3IDD4     | Neural cell adhesion molecule 1                   | Both Biological Replicates | 3                           |
| G3I3X4     | Non-POU domain-containing octamer-binding protein | Both Biological Replicates | 2                           |
| G3IJR3     | Nuclease-sensitive element-binding protein 1      | Both Biological Replicates | 3                           |
| G3HTL1     | Nucleoside diphosphate kinase                     | Both Biological Replicates | 2                           |
| G3IFP5     | Oxysterol-binding protein                         | Both Biological Replicates | 2                           |
| G3HDT0     | Peripherin                                        | Both Biological Replicates | 3                           |
| G3H576     | Prohibitin                                        | Both Biological Replicates | 2                           |
| G3I5H3     | Protein disulfide-isomerase                       | Both Biological Replicates | 3                           |
| G3GSN1     | Protein disulfide-isomerase A5                    | Both Biological Replicates | 2                           |
| G3HJW0     | Putative allantoicase                             | Both Biological Replicates | 2                           |
| G3IBP3     | Putative ATP-dependent RNA helicase DDX6          | Both Biological Replicates | 4                           |
| G3I558     | Putative RNA exonuclease NEF-sp                   | Both Biological Replicates | 2                           |
| G3GVD0     | Pyruvate kinase                                   | Both Biological Replicates | 11                          |
| G3I6P1     | Radixin                                           | Both Biological Replicates | 2                           |
| G3HBD4     | Ras-related protein Rab-1B                        | Both Biological Replicates | 2                           |
| G3HUA1     | Retinoic acid receptor gamma                      | Both Biological Replicates | 2                           |
| G3H2N7     | Sacsin                                            | Both Biological Replicates | 2                           |
| G3H8R0     | Serine/threonine-protein kinase PCTAIRE-3         | Both Biological Replicates | 2                           |
| G3H2J8     | SERPINH1                                          | Both Biological Replicates | 3                           |
| G3IDD9     | Small nuclear ribonucleoprotein F                 | Both Biological Replicates | 2                           |
| G3IH63     | Spermatogenesis-associated protein 5              | Both Biological Replicates | 2                           |
| G3ID81     | Talin-1                                           | Both Biological Replicates | 3                           |
| G3HSP9     | Tetratricopeptide repeat protein 3                | Both Biological Replicates | 2                           |
| G3HSL4     | Transcription intermediary factor 1-beta          | Both Biological Replicates | 4                           |
| G3I8F9     | Transgelin                                        | Both Biological Replicates | 5                           |
| G3GSP9     | Tubulin beta chain                                | Both Biological Replicates | 2                           |
| G3IAS8     | Tubulin beta chain                                | Both Biological Replicates | 3                           |
| G3IPJ0     | Tubulin beta chain                                | Both Biological Replicates | 2                           |
| G3HFM7     | Tubulin beta-3 chain                              | Both Biological Replicates | 3                           |
| G3I2E9     | Tubulin beta-6 chain                              | Both Biological Replicates | 3                           |
| G3IEG6     | Tubulin--tyrosine ligase-like protein 12          | Both Biological Replicates | 6                           |
| G3I4A0     | VIM                                               | Both Biological Replicates | 4                           |
| G3HWC3     | Zinc fingers and homeoboxes protein 3             | Both Biological Replicates | 2                           |
| G3H1V7     | Actin, cytoplasmic 2                              | Both Biological Replicates | 3                           |

Table S4. IC-FPOP oxidatively modified proteins in MCF-10A Cells.

| Uniprot ID | Protein Name                                               | Biological Replicate        | Number of Modified Peptides |
|------------|------------------------------------------------------------|-----------------------------|-----------------------------|
| P31946     | 14-3-3 protein beta/alpha                                  | Biological Replicate 1 Only | 1                           |
| P27348     | 14-3-3 protein theta                                       | Biological Replicate 1 Only | 1                           |
| B9VP19     | 60 kDa chaperonin                                          | Biological Replicate 1 Only | 1                           |
| P68032     | Actin, alpha cardiac muscle 1                              | Biological Replicate 1 Only | 1                           |
| Q8N3C0     | Activating signal cointegrator 1 complex subunit 3         | Biological Replicate 1 Only | 1                           |
| A8K1F6     | Adenosine receptor A2                                      | Biological Replicate 1 Only | 1                           |
| Q5H913     | ADP-ribosylation factor-like protein 13A                   | Biological Replicate 1 Only | 1                           |
| B2R825     | Alpha-1,4 glucan phosphorylase                             | Biological Replicate 1 Only | 1                           |
| P06733     | Alpha-enolase                                              | Biological Replicate 1 Only | 2                           |
| L0R849     | Alternative protein EDARADD                                | Biological Replicate 1 Only | 1                           |
| L8E9I3     | Alternative protein TRIM67                                 | Biological Replicate 1 Only | 1                           |
| L8E905     | Alternative protein WDFY1                                  | Biological Replicate 1 Only | 1                           |
| P07355     | Annexin A2                                                 | Biological Replicate 1 Only | 2                           |
| P08758     | Annexin A5                                                 | Biological Replicate 1 Only | 1                           |
| B3KXW5     | AP-1 complex subunit gamma                                 | Biological Replicate 1 Only | 1                           |
| A0A024R0X0 | AP1 gamma subunit binding protein 1,                       | Biological Replicate 1 Only | 1                           |
| F8WCH3     | Apolipoprotein L1                                          | Biological Replicate 1 Only | 1                           |
| Q07812     | Apoptosis regulator BAX                                    | Biological Replicate 1 Only | 1                           |
| B9EH95     | Armadillo repeat gene deletes in velocardiofacial syndrome | Biological Replicate 1 Only | 1                           |
| Q6NXE6     | Armadillo repeat-containing protein 6                      | Biological Replicate 1 Only | 1                           |
| A0A024RAI1 | ARP3 actin-related protein 3 homolog                       | Biological Replicate 1 Only | 1                           |
| Q6SPF0     | Atherin                                                    | Biological Replicate 1 Only | 1                           |
| Q43313     | ATM interactor                                             | Biological Replicate 1 Only | 1                           |
| V9HW31     | ATP synthase subunit beta                                  | Biological Replicate 1 Only | 2                           |
| C9JTY4     | ATP-binding cassette sub-family B                          | Biological Replicate 1 Only | 1                           |
| Q14CR0     | ATP-binding cassette, sub-family G , member 8              | Biological Replicate 1 Only | 1                           |
| A0A068W6H0 | Basal cell adhesion molecule                               | Biological Replicate 1 Only | 1                           |
| P35613     | Basigin                                                    | Biological Replicate 1 Only | 2                           |
| Q9UE89     | Beta-actin                                                 | Biological Replicate 1 Only | 2                           |
| P50583     | Bis-tetraphosphatase                                       | Biological Replicate 1 Only | 1                           |
| P80723     | Brain acid soluble protein 1                               | Biological Replicate 1 Only | 1                           |
| Q6QJE6     | Breakpoint cluster region protein                          | Biological Replicate 1 Only | 1                           |
| Q7KYR7     | Butyrophilin subfamily 2 member A1                         | Biological Replicate 1 Only | 1                           |
| E7EMB3     | Calmodulin-2                                               | Biological Replicate 1 Only | 2                           |
| V9HW88     | Calreticulin                                               | Biological Replicate 1 Only | 3                           |
| Q7L1S5     | Carbohydrate sulfotransferase 9                            | Biological Replicate 1 Only | 1                           |
| Q66K79     | Carboxypeptidase Z                                         | Biological Replicate 1 Only | 1                           |
| Q8WXD9     | Caskin-1                                                   | Biological Replicate 1 Only | 1                           |
| P07339     | Cathepsin D                                                | Biological Replicate 1 Only | 1                           |
| Q6NZI2     | Caveolae-associated protein 1                              | Biological Replicate 1 Only | 1                           |
| Q6P2H3     | Centrosomal protein of 85 kDa                              | Biological Replicate 1 Only | 1                           |
| Q8NA72     | Centrosomal protein POC5                                   | Biological Replicate 1 Only | 1                           |
| P29973     | cGMP-gated cation channel alpha-1                          | Biological Replicate 1 Only | 1                           |
| Q1RMC5     | Claspin homolog                                            | Biological Replicate 1 Only | 1                           |
| A0A087WVQ6 | Clathrin heavy chain                                       | Biological Replicate 1 Only | 1                           |
| P08709     | Coagulation factor VII                                     | Biological Replicate 1 Only | 1                           |

| Uniprot ID | Protein Name                                      | Biological Replicate        | Number of Modified Peptides |
|------------|---------------------------------------------------|-----------------------------|-----------------------------|
| Q5TAT6     | Collagen alpha-1 chain                            | Biological Replicate 1 Only | 1                           |
| D6RFN0     | COP9 signalosome complex subunit 4                | Biological Replicate 1 Only | 1                           |
| P35670     | Copper-transporting ATPase 2                      | Biological Replicate 1 Only | 1                           |
| A0A0D9SG04 | Cordon-bleu protein-like 1                        | Biological Replicate 1 Only | 1                           |
| Q5VU57     | Cytosolic carboxypeptidase 6                      | Biological Replicate 1 Only | 1                           |
| D6RGX7     | DCN1-like protein 4                               | Biological Replicate 1 Only | 1                           |
| Q96BY6     | Dedicator of cytokinesis protein 10               | Biological Replicate 1 Only | 1                           |
| B7ZLJ0     | DIAPH2 protein                                    | Biological Replicate 1 Only | 1                           |
| A0A1C7CYX9 | Dihydropyrimidinase-related protein 2             | Biological Replicate 1 Only | 1                           |
| I0EZ64     | DNA primase large subunit                         | Biological Replicate 1 Only | 1                           |
| P11388     | DNA topoisomerase 2-alpha                         | Biological Replicate 1 Only | 1                           |
| O14802     | DNA-directed RNA polymerase III subunit RPC1      | Biological Replicate 1 Only | 1                           |
| Q9H596     | Dual specificity protein phosphatase 21           | Biological Replicate 1 Only | 1                           |
| Q9C0G6     | Dynein heavy chain 6, axonemal                    | Biological Replicate 1 Only | 1                           |
| Q9HCI6     | E3 SUMO-protein ligase KIAA1586                   | Biological Replicate 1 Only | 1                           |
| P53804     | E3 ubiquitin-protein ligase TTC3                  | Biological Replicate 1 Only | 1                           |
| A0A0S2Z3L0 | Electron-transfer-flavoprotein alpha polypeptide  | Biological Replicate 1 Only | 1                           |
| P49411     | Elongation factor Tu, mitochondrial               | Biological Replicate 1 Only | 1                           |
| Q6PCB8     | Embiggin                                          | Biological Replicate 1 Only | 1                           |
| O94919     | Endonuclease domain-containing 1 protein          | Biological Replicate 1 Only | 1                           |
| Q5D1E8     | Endoribonuclease ZC3H12A                          | Biological Replicate 1 Only | 1                           |
| V9HW25     | Epididymis secretory protein Li 273               | Biological Replicate 1 Only | 1                           |
| A0A024R3X4 | Epididymis secretory sperm binding protein        | Biological Replicate 1 Only | 1                           |
| V9HWC2     | Epididymis secretory sperm binding protein Li 67p | Biological Replicate 1 Only | 1                           |
| V9HWB4     | Epididymis secretory sperm binding protein Li 89n | Biological Replicate 1 Only | 2                           |
| Q99645     | Epiphykan                                         | Biological Replicate 1 Only | 1                           |
| O95073     | Fibrinogen silencer-binding protein               | Biological Replicate 1 Only | 1                           |
| A0A024R321 | Filamin B, beta ,                                 | Biological Replicate 1 Only | 1                           |
| Q13467     | Frizzled-5                                        | Biological Replicate 1 Only | 1                           |
| Q53GS0     | G protein-binding protein CRFG variant            | Biological Replicate 1 Only | 1                           |
| Q59ET0     | Glucan, branching enzyme 1 variant                | Biological Replicate 1 Only | 1                           |
| Q5VZ30     | Glutamate decarboxylase 2                         | Biological Replicate 1 Only | 1                           |
| O15399     | Glutamate receptor ionotropic, NMDA 2D            | Biological Replicate 1 Only | 1                           |
| P51790     | H/Cl exchange transporter 3                       | Biological Replicate 1 Only | 1                           |
| A0A024R3R4 | HCG1984091,                                       | Biological Replicate 1 Only | 1                           |
| O43390     | Heterogeneous nuclear ribonucleoprotein R         | Biological Replicate 1 Only | 1                           |
| A0A1X7SBS1 | Heterogeneous nuclear ribonucleoprotein U         | Biological Replicate 1 Only | 1                           |
| Q6UWP5     | HHSL751                                           | Biological Replicate 1 Only | 1                           |
| B2R4R0     | Histone H4                                        | Biological Replicate 1 Only | 2                           |
| P16144     | Integrin beta-4                                   | Biological Replicate 1 Only | 1                           |
| D3DUZ3     | Interferon, gamma-inducible protein 16,           | Biological Replicate 1 Only | 1                           |
| A0A1B0GTI5 | Interleukin-10 receptor subunit beta              | Biological Replicate 1 Only | 1                           |
| M0R2W5     | Kallikrein-2                                      | Biological Replicate 1 Only | 1                           |
| A0A024RA36 | KIAA0241,                                         | Biological Replicate 1 Only | 1                           |
| D3DRX6     | Kinesin-like protein                              | Biological Replicate 1 Only | 1                           |
| O15066     | Kinesin-like protein KIF3B                        | Biological Replicate 1 Only | 1                           |
| Q6ZMV9     | Kinesin-like protein KIF6                         | Biological Replicate 1 Only | 1                           |
| I6LFJ3     | KIR3DS1                                           | Biological Replicate 1 Only | 1                           |

| Uniprot ID | Protein Name                                                  | Biological Replicate        | Number of Modified Peptides |
|------------|---------------------------------------------------------------|-----------------------------|-----------------------------|
| Q8IV20     | Laccase domain-containing protein 1                           | Biological Replicate 1 Only | 1                           |
| A0A1W2PPA8 | Leucine-, glutamate- and lysine-rich protein 1                | Biological Replicate 1 Only | 1                           |
| F6TER3     | Leukocyte immunoglobulin-like receptor subfamily B member 1   | Biological Replicate 1 Only | 1                           |
| P00338     | L-lactate dehydrogenase A chain                               | Biological Replicate 1 Only | 1                           |
| Q8N2K0     | Lysophosphatidylserine lipase ABHD12                          | Biological Replicate 1 Only | 1                           |
| A0A140VJC9 | Lysophospholipase II,                                         | Biological Replicate 1 Only | 1                           |
| H3BU53     | MAX gene-associated protein                                   | Biological Replicate 1 Only | 1                           |
| P16035     | Metalloproteinase inhibitor 2                                 | Biological Replicate 1 Only | 1                           |
| F6IB50     | MHC class I antigen                                           | Biological Replicate 1 Only | 1                           |
| F6IQX8     | MHC class I antigen                                           | Biological Replicate 1 Only | 1                           |
| A0A0G2JN42 | Mucin-6                                                       | Biological Replicate 1 Only | 1                           |
| A5Z217     | Mutant desmin                                                 | Biological Replicate 1 Only | 2                           |
| P12829     | Myosin light chain 4                                          | Biological Replicate 1 Only | 1                           |
| G8JLA2     | Myosin light polypeptide 6                                    | Biological Replicate 1 Only | 1                           |
| P24844     | Myosin regulatory light polypeptide 9                         | Biological Replicate 1 Only | 1                           |
| O95169     | NADH dehydrogenase 1 beta subcomplex subunit 8, mitochondrial | Biological Replicate 1 Only | 1                           |
| O43181     | NADH dehydrogenase iron-sulfur protein 4, mitochondrial       | Biological Replicate 1 Only | 1                           |
| H0YHX9     | Nascent polypeptide-associated complex subunit alpha          | Biological Replicate 1 Only | 1                           |
| A0A0A0MS79 | Nck-associated protein 5                                      | Biological Replicate 1 Only | 1                           |
| P08473     | Neprilysin                                                    | Biological Replicate 1 Only | 1                           |
| Q8WXH0     | Nesprin-2                                                     | Biological Replicate 1 Only | 1                           |
| Q13562     | Neurogenic differentiation factor 1                           | Biological Replicate 1 Only | 1                           |
| P17677     | Neuromodulin                                                  | Biological Replicate 1 Only | 2                           |
| Q32Q12     | Nucleoside diphosphate kinase                                 | Biological Replicate 1 Only | 1                           |
| A6NGQ3     | Obscurin                                                      | Biological Replicate 1 Only | 1                           |
| A0A126GWL3 | Olfactory receptor                                            | Biological Replicate 1 Only | 1                           |
| A7BI36     | p180/ribosome receptor                                        | Biological Replicate 1 Only | 1                           |
| Q6ZV29     | Patatin-like phospholipase domain-containing protein 7        | Biological Replicate 1 Only | 1                           |
| A8K486     | Peptidyl-prolyl cis-trans isomerase                           | Biological Replicate 1 Only | 1                           |
| O60437     | Periplakin                                                    | Biological Replicate 1 Only | 1                           |
| Q06830     | Peroxiredoxin-1                                               | Biological Replicate 1 Only | 2                           |
| P30044     | Peroxiredoxin-5, mitochondrial                                | Biological Replicate 1 Only | 1                           |
| P51659     | Peroxisomal multifunctional enzyme type 2                     | Biological Replicate 1 Only | 1                           |
| O75167     | Phosphatase and actin regulator 2                             | Biological Replicate 1 Only | 1                           |
| Q53G35     | Phosphoglycerate mutase                                       | Biological Replicate 1 Only | 1                           |
| P16234     | Platelet-derived growth factor receptor alpha                 | Biological Replicate 1 Only | 1                           |
| Q15365     | Poly-binding protein 1                                        | Biological Replicate 1 Only | 1                           |
| H7BZN7     | Probable ATP-dependent RNA helicase DDX56                     | Biological Replicate 1 Only | 1                           |
| Q86YR7     | Probable guanine nucleotide exchange factor MCF2L2            | Biological Replicate 1 Only | 1                           |
| O00469     | Procollagen-lysine,2-oxoglutarate 5-dioxygenase 2             | Biological Replicate 1 Only | 1                           |
| P07737     | Profilin-1                                                    | Biological Replicate 1 Only | 2                           |
| P46013     | Proliferation marker protein Ki-67                            | Biological Replicate 1 Only | 1                           |
| Q8IVF2     | Protein AHNAK2                                                | Biological Replicate 1 Only | 1                           |
| V9HVV3     | Protein disulfide-isomerase                                   | Biological Replicate 1 Only | 1                           |
| Q15084     | Protein disulfide-isomerase A6                                | Biological Replicate 1 Only | 1                           |
| A6NJV1     | Protein FAM166C                                               | Biological Replicate 1 Only | 1                           |
| Q6ZV65     | Protein FAM47E                                                | Biological Replicate 1 Only | 1                           |
| Q86UY5     | Protein FAM83A                                                | Biological Replicate 1 Only | 1                           |

| Uniprot ID | Protein Name                                                            | Biological Replicate        | Number of Modified Peptides |
|------------|-------------------------------------------------------------------------|-----------------------------|-----------------------------|
| K7EM46     | Protein hinderin                                                        | Biological Replicate 1 Only | 1                           |
| A0A024QZR3 | Protein pelota homolog                                                  | Biological Replicate 1 Only | 1                           |
| Q8TAB3     | Protocadherin-19                                                        | Biological Replicate 1 Only | 1                           |
| O60245     | Protocadherin-7                                                         | Biological Replicate 1 Only | 1                           |
| Q7RTM1     | Proton channel OTOP1                                                    | Biological Replicate 1 Only | 1                           |
| Q59EL4     | PRPF4 protein variant                                                   | Biological Replicate 1 Only | 1                           |
| A8MXQ7     | Putative IQ motif and ankyrin repeat domain-containing protein LOC64257 | Biological Replicate 1 Only | 1                           |
| A6NDY2     | Putative protein FAM90A10P                                              | Biological Replicate 1 Only | 1                           |
| V9HWB8     | Pyruvate kinase                                                         | Biological Replicate 1 Only | 1                           |
| Q5R372     | Rab GTPase-activating protein 1-like                                    | Biological Replicate 1 Only | 1                           |
| P36888     | Receptor-type tyrosine-protein kinase FLT3                              | Biological Replicate 1 Only | 1                           |
| B1APM2     | Regulator of G-protein signalling 5,                                    | Biological Replicate 1 Only | 1                           |
| Q15293     | Reticulocalbin-1                                                        | Biological Replicate 1 Only | 1                           |
| A6NKG5     | Retrotransposon-like protein 1                                          | Biological Replicate 1 Only | 1                           |
| A0A087WU09 | Rootletin                                                               | Biological Replicate 1 Only | 1                           |
| A0A1W2PPP7 | Rotatin                                                                 | Biological Replicate 1 Only | 1                           |
| A8K2G0     | Secretory carrier-associated membrane protein                           | Biological Replicate 1 Only | 1                           |
| A0A0A0MQU6 | Sema domain, transmembrane domain , and cytoplasmic domain, 6A,         | Biological Replicate 1 Only | 1                           |
| Q6UWB4     | Serine protease 55                                                      | Biological Replicate 1 Only | 1                           |
| A0A087WXA3 | Serine/arginine repetitive matrix protein 3                             | Biological Replicate 1 Only | 1                           |
| A0A1B0GTZ4 | Serine/threonine-protein kinase DCLK3                                   | Biological Replicate 1 Only | 1                           |
| Q16513     | Serine/threonine-protein kinase N2                                      | Biological Replicate 1 Only | 1                           |
| Q6P3R8     | Serine/threonine-protein kinase Nek5                                    | Biological Replicate 1 Only | 1                           |
| Q9H4A3     | Serine/threonine-protein kinase WNK1                                    | Biological Replicate 1 Only | 1                           |
| B5BTZ6     | Signal transducer and activator of transcription                        | Biological Replicate 1 Only | 1                           |
| Q59GK1     | Solute carrier family 2 , member 6 variant                              | Biological Replicate 1 Only | 1                           |
| B7ZKT5     | Son of sevenless homolog 2                                              | Biological Replicate 1 Only | 1                           |
| B5MBX0     | Sororin                                                                 | Biological Replicate 1 Only | 1                           |
| A0A087WTE6 | SRC kinase-signaling inhibitor 1                                        | Biological Replicate 1 Only | 1                           |
| Q3MIM1     | STON1-GTF2A1L readthrough transcript                                    | Biological Replicate 1 Only | 1                           |
| P31948     | Stress-induced-phosphoprotein 1                                         | Biological Replicate 1 Only | 1                           |
| Q15400     | Syntaxin-7                                                              | Biological Replicate 1 Only | 1                           |
| A0A0C4DH28 | T cell receptor gamma variable 4                                        | Biological Replicate 1 Only | 1                           |
| P82094     | TATA element modulatory factor                                          | Biological Replicate 1 Only | 1                           |
| Q8NA31     | Telomere repeats-binding bouquet formation protein 1                    | Biological Replicate 1 Only | 1                           |
| A0A140VJQ4 | Testicular tissue protein Li 130                                        | Biological Replicate 1 Only | 1                           |
| Q16495     | Thyroid peroxidase                                                      | Biological Replicate 1 Only | 1                           |
| A0A0A0MTS7 | Titin                                                                   | Biological Replicate 1 Only | 2                           |
| P20290     | Transcription factor BTF3                                               | Biological Replicate 1 Only | 1                           |
| H0Y CZ6    | Transcriptional enhancer factor TEF-1                                   | Biological Replicate 1 Only | 1                           |
| J3KNP2     | Transducin beta-like protein 3                                          | Biological Replicate 1 Only | 1                           |
| P55072     | Transitional endoplasmic reticulum ATPase                               | Biological Replicate 1 Only | 1                           |
| Q2LD37     | Transmembrane protein KIAA1109                                          | Biological Replicate 1 Only | 1                           |
| Q2QD09     | Triosephosphate isomerase                                               | Biological Replicate 1 Only | 1                           |
| Q12816     | Trophinin                                                               | Biological Replicate 1 Only | 1                           |
| H7BYY1     | Tropomyosin 1 ,                                                         | Biological Replicate 1 Only | 1                           |
| A0A0S2Z4G4 | Tropomyosin 3                                                           | Biological Replicate 1 Only | 1                           |
| P67936     | Tropomyosin alpha-4 chain                                               | Biological Replicate 1 Only | 2                           |



| Uniprot ID | Protein Name                                            | Biological Replicate        | Number of Modified Peptides |
|------------|---------------------------------------------------------|-----------------------------|-----------------------------|
| P13805     | Troponin T, slow skeletal muscle                        | Biological Replicate 1 Only | 1                           |
| B2R6L0     | Tubulin beta chain                                      | Biological Replicate 1 Only | 1                           |
| P07437     | Tubulin beta chain                                      | Biological Replicate 1 Only | 1                           |
| Q13509     | Tubulin beta-3 chain                                    | Biological Replicate 1 Only | 3                           |
| P68371     | Tubulin beta-4B chain                                   | Biological Replicate 1 Only | 1                           |
| Q9BUF5     | Tubulin beta-6 chain                                    | Biological Replicate 1 Only | 2                           |
| K7EK43     | Tubulin beta-6 chain                                    | Biological Replicate 1 Only | 1                           |
| Q6IBS0     | Twinfilin-2                                             | Biological Replicate 1 Only | 1                           |
| A0A126LAX6 | U30                                                     | Biological Replicate 1 Only | 1                           |
| Q6ZU65     | Ubinuclein-2                                            | Biological Replicate 1 Only | 1                           |
| Q8IYU4     | Ubiquilin-like protein                                  | Biological Replicate 1 Only | 1                           |
| Q5UGI3     | Ubiquitin C splice variant                              | Biological Replicate 1 Only | 1                           |
| Q8N5J2     | Ubiquitin carboxyl-terminal hydrolase MINDY-1           | Biological Replicate 1 Only | 1                           |
| A0A024RDB0 | Ubiquitin-activating enzyme E1-like 2,                  | Biological Replicate 1 Only | 1                           |
| Q15819     | Ubiquitin-conjugating enzyme E2 variant 2               | Biological Replicate 1 Only | 1                           |
| Q3KQV9     | UDP-N-acetylhexosamine pyrophosphorylase-like protein 1 | Biological Replicate 1 Only | 1                           |
| A0A1W2PQF2 | Uncharacterized protein                                 | Biological Replicate 1 Only | 1                           |
| Q6NV74     | Uncharacterized protein KIAA1211-like                   | Biological Replicate 1 Only | 1                           |
| H3BMM1     | Unconventional myosin-IXa                               | Biological Replicate 1 Only | 1                           |
| J3QRI8     | UPF0183 protein C16orf70                                | Biological Replicate 1 Only | 1                           |
| B5LY69     | Uridine monophosphate synthetase                        | Biological Replicate 1 Only | 1                           |
| O75436     | Vacuolar protein sorting-associated protein 26A         | Biological Replicate 1 Only | 1                           |
| A0A0S2Z4N8 | Vasodilator-stimulated phosphoprotein                   | Biological Replicate 1 Only | 1                           |
| P08670     | Vimentin                                                | Biological Replicate 1 Only | 4                           |
| P18206     | Vinculin                                                | Biological Replicate 1 Only | 2                           |
| P11473     | Vitamin D3 receptor                                     | Biological Replicate 1 Only | 1                           |
| Q15061     | WD repeat-containing protein 43                         | Biological Replicate 1 Only | 1                           |
| Q5GH72     | XK-related protein 7                                    | Biological Replicate 1 Only | 1                           |
| O15015     | Zinc finger protein 646                                 | Biological Replicate 1 Only | 1                           |
| H7BZC4     | 28S ribosomal protein S9, mitochondrial                 | Biological Replicate 2 Only | 1                           |
| C9IZN3     | Actin-related protein 3C                                | Biological Replicate 2 Only | 1                           |
| O95996     | Adenomatous polyposis coli protein 2                    | Biological Replicate 2 Only | 1                           |
| L8EAF3     | Alternative protein ZEB1                                | Biological Replicate 2 Only | 1                           |
| Q9H310     | Ammonium transporter Rh type B                          | Biological Replicate 2 Only | 1                           |
| Q9UPQ3     | Arf-GAP with GTPase                                     | Biological Replicate 2 Only | 1                           |
| O43150     | Arf-GAP with SH3 domain                                 | Biological Replicate 2 Only | 1                           |
| A0A0S2Z3L2 | ATPase Ca++ transporting cardiac muscle slow twitch 2   | Biological Replicate 2 Only | 1                           |
| O43918     | Autoimmune regulator                                    | Biological Replicate 2 Only | 1                           |
| Q562R1     | Beta-actin-like protein 2                               | Biological Replicate 2 Only | 2                           |
| O60716     | Catenin delta-1                                         | Biological Replicate 2 Only | 1                           |
| P02452     | Collagen alpha-1 chain                                  | Biological Replicate 2 Only | 5                           |
| A0A0S2Z3H5 | Collagen type I alpha 2                                 | Biological Replicate 2 Only | 1                           |
| D3DRA2     | Collagen, type XVII, alpha 1,                           | Biological Replicate 2 Only | 1                           |
| P01024     | Complement C3                                           | Biological Replicate 2 Only | 1                           |
| Q59EK7     | CS0DF038YO05 variant                                    | Biological Replicate 2 Only | 1                           |
| Q13363     | C-terminal-binding protein 1                            | Biological Replicate 2 Only | 1                           |
| Q14204     | Cytoplasmic dynein 1 heavy chain 1                      | Biological Replicate 2 Only | 1                           |
| B4DLA6     | DNA helicase                                            | Biological Replicate 2 Only | 1                           |

| Uniprot ID | Protein Name                                                               | Biological Replicate        | Number of Modified Peptides |
|------------|----------------------------------------------------------------------------|-----------------------------|-----------------------------|
| P49916     | DNA ligase 3                                                               | Biological Replicate 2 Only | 1                           |
| P78563     | Double-stranded RNA-specific editase 1                                     | Biological Replicate 2 Only | 1                           |
| Q5T4S7     | E3 ubiquitin-protein ligase UBR4                                           | Biological Replicate 2 Only | 1                           |
| E7ESC7     | E3 ubiquitin-protein transferase MAEA                                      | Biological Replicate 2 Only | 1                           |
| V9HW22     | Epididymis luminal protein 33                                              | Biological Replicate 2 Only | 2                           |
| J3KSS3     | FYVE, RhoGEF and PH domain-containing protein 4                            | Biological Replicate 2 Only | 1                           |
| O75140     | GATOR complex protein DEPDC5                                               | Biological Replicate 2 Only | 1                           |
| P04406     | Glyceraldehyde-3-phosphate dehydrogenase                                   | Biological Replicate 2 Only | 3                           |
| A0A024R2V1 | HCG20123,                                                                  | Biological Replicate 2 Only | 1                           |
| Q5XTR9     | Hemoglobin delta-beta fusion protein                                       | Biological Replicate 2 Only | 1                           |
| Q86YZ3     | Hornerin                                                                   | Biological Replicate 2 Only | 1                           |
| Q6LBH2     | HPX-6 protein                                                              | Biological Replicate 2 Only | 1                           |
| Q86UW8     | Hyaluronan and proteoglycan link protein 4                                 | Biological Replicate 2 Only | 1                           |
| Q9H0B3     | IQ domain-containing protein N                                             | Biological Replicate 2 Only | 1                           |
| J3KR23     | IST1 homolog                                                               | Biological Replicate 2 Only | 1                           |
| A0A024R1X8 | Junction plakoglobin,                                                      | Biological Replicate 2 Only | 1                           |
| H6VRG1     | Keratin 1                                                                  | Biological Replicate 2 Only | 12                          |
| P13645     | Keratin, type I cytoskeletal 10                                            | Biological Replicate 2 Only | 11                          |
| P02533     | Keratin, type I cytoskeletal 14                                            | Biological Replicate 2 Only | 4                           |
| Q04695     | Keratin, type I cytoskeletal 17                                            | Biological Replicate 2 Only | 1                           |
| P35908     | Keratin, type II cytoskeletal 2 epidermal                                  | Biological Replicate 2 Only | 4                           |
| P12035     | Keratin, type II cytoskeletal 3                                            | Biological Replicate 2 Only | 1                           |
| P13647     | Keratin, type II cytoskeletal 5                                            | Biological Replicate 2 Only | 2                           |
| P04259     | Keratin, type II cytoskeletal 6B                                           | Biological Replicate 2 Only | 2                           |
| Q5XKE5     | Keratin, type II cytoskeletal 79                                           | Biological Replicate 2 Only | 1                           |
| Q59EB0     | Kinase insert domain receptor variant                                      | Biological Replicate 2 Only | 1                           |
| Q7Z4S6     | Kinesin-like protein KIF21A                                                | Biological Replicate 2 Only | 1                           |
| P11047     | Laminin subunit gamma-1                                                    | Biological Replicate 2 Only | 2                           |
| Q96FE5     | Leucine-rich repeat protein 1                                              | Biological Replicate 2 Only | 1                           |
| A0A0G2JNQ6 | Leukocyte immunoglobulin-like receptor subfamily B member 1                | Biological Replicate 2 Only | 1                           |
| Q8N5K9     | LOC645895 protein                                                          | Biological Replicate 2 Only | 1                           |
| Q86XM6     | LPPR4 protein                                                              | Biological Replicate 2 Only | 1                           |
| O95983     | Methyl-CpG-binding domain protein 3                                        | Biological Replicate 2 Only | 1                           |
| F6IR41     | MHC class I antigen                                                        | Biological Replicate 2 Only | 1                           |
| A0A0G2JMX7 | Microtubule-associated protein                                             | Biological Replicate 2 Only | 1                           |
| A7UNU5     | Mutant electron-transferring flavoprotein dehydrogenase                    | Biological Replicate 2 Only | 1                           |
| Q76KP1     | /I-beta-glucosaminyl-glycoprotein 4-beta-N-acetylgalactosaminyltransferase | Biological Replicate 2 Only | 1                           |
| A0A087X1N7 | Nebulin                                                                    | Biological Replicate 2 Only | 1                           |
| C6KE32     | P2X purinoceptor                                                           | Biological Replicate 2 Only | 1                           |
| O75781     | Paralemmin-1                                                               | Biological Replicate 2 Only | 1                           |
| O60664     | Perilipin-3                                                                | Biological Replicate 2 Only | 1                           |
| P0CG39     | POTE ankyrin domain family member J                                        | Biological Replicate 2 Only | 1                           |
| Q07954     | Prolow-density lipoprotein receptor-related protein 1                      | Biological Replicate 2 Only | 1                           |
| Q5TDH0     | Protein DDI1 homolog 2                                                     | Biological Replicate 2 Only | 1                           |
| A0A024R8S5 | Protein disulfide-isomerase                                                | Biological Replicate 2 Only | 2                           |
| Q14554     | Protein disulfide-isomerase A5                                             | Biological Replicate 2 Only | 1                           |
| A0A024R8D6 | Protein kinase N3,                                                         | Biological Replicate 2 Only | 1                           |
| A0A1U9X972 | PRRC2A                                                                     | Biological Replicate 2 Only | 1                           |

| Uniprot ID | Protein Name                                            | Biological Replicate        | Number of Modified Peptides |
|------------|---------------------------------------------------------|-----------------------------|-----------------------------|
| Q5HY64     | Putative protein FAM47C                                 | Biological Replicate 2 Only | 1                           |
| Q9BRP9     | Putative uncharacterized protein MGC13053               | Biological Replicate 2 Only | 1                           |
| A0A024R136 | Rac GTPase activating protein 1,                        | Biological Replicate 2 Only | 1                           |
| Q86XE0     | Sorting nexin-32                                        | Biological Replicate 2 Only | 1                           |
| A0A024RON6 | Spectrin beta chain                                     | Biological Replicate 2 Only | 1                           |
| Q7RTM4     | Spectrin-like protein of the nuclear envelope and Golgi | Biological Replicate 2 Only | 1                           |
| Q8NDV3     | Structural maintenance of chromosomes protein 1B        | Biological Replicate 2 Only | 1                           |
| Q86US8     | Telomerase-binding protein EST1A                        | Biological Replicate 2 Only | 1                           |
| A0A0S2Z577 | Vacuolar protein sorting 33-like protein B              | Biological Replicate 2 Only | 1                           |
| A0A024R4Q4 | Zinc finger protein 329,                                | Biological Replicate 2 Only | 1                           |
| Q3ZCX4     | Zinc finger protein 568                                 | Biological Replicate 2 Only | 1                           |
| Q6ZN30     | Zinc finger protein basonuclin-2                        | Biological Replicate 2 Only | 1                           |
| P63220     | 40S ribosomal protein S21                               | Both Biological Replicates  | 4                           |
| P60709     | Actin, cytoplasmic 1                                    | Both Biological Replicates  | 6                           |
| P15144     | Aminopeptidase N                                        | Both Biological Replicates  | 8                           |
| V9HWP2     | Epididymis luminal protein 35                           | Both Biological Replicates  | 2                           |
| D0PNI1     | Epididymis luminal protein 4                            | Both Biological Replicates  | 2                           |
| P09382     | Galectin-1                                              | Both Biological Replicates  | 4                           |
| Q59EJ3     | Heat shock 70kDa protein 1A variant                     | Both Biological Replicates  | 2                           |
| A0A024RD80 | Heat shock protein 90kDa alpha , class B member 1,      | Both Biological Replicates  | 2                           |
| P35527     | Keratin, type I cytoskeletal 9                          | Both Biological Replicates  | 20                          |
| A0A024R1N1 | Myosin, heavy polypeptide 9, non-muscle,                | Both Biological Replicates  | 4                           |
| Q09666     | Neuroblast differentiation-associated protein AHNAK     | Both Biological Replicates  | 6                           |
| P06703     | Protein S100-A6                                         | Both Biological Replicates  | 4                           |
| Q6FG99     | RPLP1 protein                                           | Both Biological Replicates  | 2                           |
| P37802     | Transgelin-2                                            | Both Biological Replicates  | 10                          |

Table S5. IC-FPOP oxidatively modified proteins in MCF-7 Cells.

| Uniprot ID | Protein Name                                                                 | Biological Replicate        | Number of Modified Peptides |
|------------|------------------------------------------------------------------------------|-----------------------------|-----------------------------|
| Q86TU7     | Actin-histidine N-methyltransferase                                          | Biological Replicate 1 Only | 1                           |
| Q59EC0     | Adenosine deaminase                                                          | Biological Replicate 1 Only | 1                           |
| Q59HB5     | Alpha 1 type XI collagen                                                     | Biological Replicate 1 Only | 1                           |
| Q86UK0     | ATP-binding cassette sub-family A member 12                                  | Biological Replicate 1 Only | 1                           |
| P21854     | B-cell differentiation antigen CD72                                          | Biological Replicate 1 Only | 1                           |
| P07686     | Beta-hexosaminidase subunit beta                                             | Biological Replicate 1 Only | 1                           |
| A6XGM4     | BORIS transcription factor transcript variant C5                             | Biological Replicate 1 Only | 1                           |
| Q5SW79     | Centrosomal protein of 170 kDa                                               | Biological Replicate 1 Only | 1                           |
| Q59EM3     | Chimerin 1 variant                                                           | Biological Replicate 1 Only | 1                           |
| Q17RW2     | Collagen alpha-1 chain                                                       | Biological Replicate 1 Only | 1                           |
| P02452     | Collagen alpha-1 chain                                                       | Biological Replicate 1 Only | 1                           |
| D9ZGF2     | Collagen                                                                     | Biological Replicate 1 Only | 1                           |
| Q6FHS1     | CTSF protein                                                                 | Biological Replicate 1 Only | 1                           |
| Q14195     | Dihydropyrimidinase-related protein 3                                        | Biological Replicate 1 Only | 1                           |
| P78325     | Disintegrin and metalloproteinase domain-containing protein 8                | Biological Replicate 1 Only | 1                           |
| A0A0A8J1J7 | Dual oxidase 2                                                               | Biological Replicate 1 Only | 1                           |
| O75592     | E3 ubiquitin-protein ligase MYCBP2                                           | Biological Replicate 1 Only | 1                           |
| A0A087WTW0 | E3 ubiquitin-protein ligase UHRF1                                            | Biological Replicate 1 Only | 1                           |
| Q8N3D4     | EH domain-binding protein 1-like protein 1                                   | Biological Replicate 1 Only | 1                           |
| B5MCA4     | Epithelial cell adhesion molecule                                            | Biological Replicate 1 Only | 1                           |
| Q86W11     | Fibrocystin-L                                                                | Biological Replicate 1 Only | 1                           |
| Q6ZNL6     | FYVE                                                                         | Biological Replicate 1 Only | 1                           |
| Q6LD43     | GA protein                                                                   | Biological Replicate 1 Only | 1                           |
| Q14749     | Glycine N-methyltransferase                                                  | Biological Replicate 1 Only | 1                           |
| Q5VSG8     | Glycoprotein endo-alpha-1                                                    | Biological Replicate 1 Only | 1                           |
| Q75T13     | GPI inositol-deacylase                                                       | Biological Replicate 1 Only | 1                           |
| A0A024R5X2 | HCG2001986                                                                   | Biological Replicate 1 Only | 1                           |
| A0A024R962 | HCG40889                                                                     | Biological Replicate 1 Only | 1                           |
| E7ERX0     | Histone-lysine N-methyltransferase MECOM                                     | Biological Replicate 1 Only | 1                           |
| Q6NW39     | Homeobox domain-containing protein                                           | Biological Replicate 1 Only | 1                           |
| P16144     | Integrin beta-4                                                              | Biological Replicate 1 Only | 1                           |
| P11047     | Laminin subunit gamma-1                                                      | Biological Replicate 1 Only | 1                           |
| Q6UWW0     | Lipocalin-15                                                                 | Biological Replicate 1 Only | 1                           |
| J7F572     | MHC class I antigen                                                          | Biological Replicate 1 Only | 1                           |
| O19649     | MHC class I antigen                                                          | Biological Replicate 1 Only | 1                           |
| P26038     | Moesin                                                                       | Biological Replicate 1 Only | 1                           |
| A0A024R071 | Nucleoporin 155kDa                                                           | Biological Replicate 1 Only | 1                           |
| Q9ULE6     | Paladin                                                                      | Biological Replicate 1 Only | 1                           |
| Q13219     | Pappalysin-1                                                                 | Biological Replicate 1 Only | 1                           |
| Q7Z738     | Supplementary Table 5. IC-FPOP oxidatively modified proteins in MCF-7 Cells. | Biological Replicate 1 Only | 1                           |
| P30041     | Peroxioredoxin-6                                                             | Biological Replicate 1 Only | 1                           |
| O60346     | PH domain leucine-rich repeat-containing protein phosphatase 1               | Biological Replicate 1 Only | 1                           |
| A6MW40     | PKDREJ                                                                       | Biological Replicate 1 Only | 1                           |
| Q5JS98     | Pre-B-cell leukemia transcription factor 3                                   | Biological Replicate 1 Only | 1                           |
| P0C7U0     | Protein ELFN1                                                                | Biological Replicate 1 Only | 1                           |
| Q05655     | Protein kinase C delta type                                                  | Biological Replicate 1 Only | 1                           |
| P49593     | Protein phosphatase 1F /calmodulin-dependent protein kinase phosphatase      | Biological Replicate 1 Only | 1                           |
| Q70YC5     | Protein ZNF365                                                               | Biological Replicate 1 Only | 1                           |
| A0A1B0GTZ2 | Putative coiled-coil domain-containing protein 196                           | Biological Replicate 1 Only | 1                           |
| B1APH4     | Putative zinc finger protein 487                                             | Biological Replicate 1 Only | 1                           |
| A0A024R3K2 | RNA pseudouridylate synthase domain containing 4                             | Biological Replicate 1 Only | 1                           |

| Uniprot ID | Protein Name                                       | Biological Replicate        | Number of Modified Peptides |
|------------|----------------------------------------------------|-----------------------------|-----------------------------|
| A0A087X080 | Ryanodine receptor 3                               | Biological Replicate 1 Only | 1                           |
| Q13591     | Semaphorin-5A                                      | Biological Replicate 1 Only | 1                           |
| P51957     | Serine/threonine-protein kinase Nek4               | Biological Replicate 1 Only | 1                           |
| A0A096LP01 | Small integral membrane protein 26                 | Biological Replicate 1 Only | 1                           |
| P78524     | Suppression of tumorigenicity 5 protein            | Biological Replicate 1 Only | 1                           |
| E9PJ55     | T-complex protein 11-like protein 1                | Biological Replicate 1 Only | 1                           |
| A0A024R2Y2 | Testicular tissue protein Li 201                   | Biological Replicate 1 Only | 1                           |
| Q14232     | Translation initiation factor eIF-2B subunit alpha | Biological Replicate 1 Only | 1                           |
| Q8N3T6     | Transmembrane protein 132C                         | Biological Replicate 1 Only | 1                           |
| F5H0Q0     | tRNA-dihydrouridine synthase -like                 | Biological Replicate 1 Only | 1                           |
| A0A1B0GUA9 | Uncharacterized protein C13orf46                   | Biological Replicate 1 Only | 1                           |
| Q5T5N4     | Uncharacterized protein C6orf118                   | Biological Replicate 1 Only | 1                           |
| Q68DQ2     | Very large A-kinase anchor protein                 | Biological Replicate 1 Only | 1                           |
| Q6AHZ1     | Zinc finger protein 518A                           | Biological Replicate 1 Only | 1                           |
| Q8TC21     | Zinc finger protein 596                            | Biological Replicate 1 Only | 1                           |
| P31946     | 14-3-3 protein beta/alpha                          | Biological Replicate 2 Only | 1                           |
| P27348     | 14-3-3 protein theta                               | Biological Replicate 2 Only | 1                           |
| P68032     | Actin                                              | Biological Replicate 2 Only | 1                           |
| Q8N3C0     | Activating signal cointegrator 1 complex subunit 3 | Biological Replicate 2 Only | 1                           |
| A8K1F6     | Adenosine receptor A2                              | Biological Replicate 2 Only | 1                           |
| L0R849     | Alternative protein EDARADD                        | Biological Replicate 2 Only | 1                           |
| L8E905     | Alternative protein WDFY1                          | Biological Replicate 2 Only | 1                           |
| B3KXW5     | AP-1 complex subunit gamma                         | Biological Replicate 2 Only | 1                           |
| Q07812     | Apoptosis regulator BAX                            | Biological Replicate 2 Only | 1                           |
| A0A024RAI1 | ARP3 actin-related protein 3 homolog               | Biological Replicate 2 Only | 1                           |
| Q6SPF0     | Atherin                                            | Biological Replicate 2 Only | 1                           |
| O43313     | ATM interactor                                     | Biological Replicate 2 Only | 1                           |
| P25705     | ATP synthase subunit alpha                         | Biological Replicate 2 Only | 1                           |
| Q7L1S5     | Carbohydrate sulfotransferase 9                    | Biological Replicate 2 Only | 1                           |
| Q8WXD9     | Caskin-1                                           | Biological Replicate 2 Only | 1                           |
| P07339     | Cathepsin D                                        | Biological Replicate 2 Only | 1                           |
| Q6NZI2     | Caveolae-associated protein 1                      | Biological Replicate 2 Only | 1                           |
| Q6P2H3     | Centrosomal protein of 85 kDa                      | Biological Replicate 2 Only | 1                           |
| P29973     | cGMP-gated cation channel alpha-1                  | Biological Replicate 2 Only | 1                           |
| Q1RMC5     | Claspin homolog                                    | Biological Replicate 2 Only | 1                           |
| Q5TAT6     | Collagen alpha-1 chain                             | Biological Replicate 2 Only | 1                           |
| P35670     | Copper-transporting ATPase 2                       | Biological Replicate 2 Only | 1                           |
| A0A0D9SG04 | Cordon-bleu protein-like 1                         | Biological Replicate 2 Only | 1                           |
| B7ZLJ0     | DIAPH2 protein                                     | Biological Replicate 2 Only | 1                           |
| A0A1C7CYX9 | Dihydropyrimidinase-related protein 2              | Biological Replicate 2 Only | 1                           |
| P11388     | DNA topoisomerase 2-alpha                          | Biological Replicate 2 Only | 1                           |
| Q9H596     | Dual specificity protein phosphatase 21            | Biological Replicate 2 Only | 1                           |
| Q9C0G6     | Dynein heavy chain 6                               | Biological Replicate 2 Only | 1                           |
| Q9HC16     | E3 SUMO-protein ligase KIAA1586                    | Biological Replicate 2 Only | 1                           |
| P53804     | E3 ubiquitin-protein ligase TTC3                   | Biological Replicate 2 Only | 1                           |
| A0A0S2Z3L0 | Electron-transfer-flavoprotein alpha polypeptide   | Biological Replicate 2 Only | 1                           |
| V9HWP2     | Epididymis luminal protein 35                      | Biological Replicate 2 Only | 4                           |
| D0PNI1     | Epididymis luminal protein 4                       | Biological Replicate 2 Only | 1                           |
| V9HW25     | Epididymis secretory protein Li 273                | Biological Replicate 2 Only | 1                           |
| V9HWC2     | Epididymis secretory sperm binding protein Li 67p  | Biological Replicate 2 Only | 1                           |
| V9HWB4     | Epididymis secretory sperm binding protein Li 89n  | Biological Replicate 2 Only | 1                           |
| Q99645     | Epiphycan                                          | Biological Replicate 2 Only | 1                           |
| O95073     | Fibrinogen silencer-binding protein                | Biological Replicate 2 Only | 1                           |

| Uniprot ID | Protein Name                                                  | Biological Replicate        | Number of Modified Peptides |
|------------|---------------------------------------------------------------|-----------------------------|-----------------------------|
| A0A024R321 | Filamin B                                                     | Biological Replicate 2 Only | 1                           |
| Q53GS0     | G protein-binding protein CRFG variant                        | Biological Replicate 2 Only | 1                           |
| P09382     | Galectin-1                                                    | Biological Replicate 2 Only | 1                           |
| Q5VZ30     | Glutamate decarboxylase 2                                     | Biological Replicate 2 Only | 1                           |
| Q59EJ3     | Heat shock 70kDa protein 1A variant                           | Biological Replicate 2 Only | 2                           |
| A0A024RD80 | Heat shock protein 90kDa alpha                                | Biological Replicate 2 Only | 1                           |
| O43390     | Heterogeneous nuclear ribonucleoprotein R                     | Biological Replicate 2 Only | 1                           |
| A0A1X7SBS1 | Heterogeneous nuclear ribonucleoprotein U                     | Biological Replicate 2 Only | 1                           |
| Q6UWP5     | HHSL751                                                       | Biological Replicate 2 Only | 1                           |
| D3DUZ3     | Interferon                                                    | Biological Replicate 2 Only | 1                           |
| P35527     | Keratin                                                       | Biological Replicate 2 Only | 1                           |
| Q8IV20     | Laccase domain-containing protein 1                           | Biological Replicate 2 Only | 1                           |
| A0A1W2PPA8 | Leucine-                                                      | Biological Replicate 2 Only | 1                           |
| A5Z217     | Mutant desmin                                                 | Biological Replicate 2 Only | 1                           |
| P24844     | Myosin regulatory light polypeptide 9                         | Biological Replicate 2 Only | 1                           |
| H0YHX9     | Nascent polypeptide-associated complex subunit alpha          | Biological Replicate 2 Only | 1                           |
| Q8WXH0     | Nesprin-2                                                     | Biological Replicate 2 Only | 1                           |
| Q13562     | Neurogenic differentiation factor 1                           | Biological Replicate 2 Only | 1                           |
| P17677     | Neuromodulin                                                  | Biological Replicate 2 Only | 1                           |
| Q6ZV29     | Patatin-like phospholipase domain-containing protein 7        | Biological Replicate 2 Only | 1                           |
| Q06830     | Peroxiredoxin-1                                               | Biological Replicate 2 Only | 1                           |
| Q53G35     | Phosphoglycerate mutase                                       | Biological Replicate 2 Only | 1                           |
| Q15365     | Poly-binding protein 1                                        | Biological Replicate 2 Only | 1                           |
| P07737     | Profilin-1                                                    | Biological Replicate 2 Only | 2                           |
| P46013     | Proliferation marker protein Ki-67                            | Biological Replicate 2 Only | 1                           |
| Q15084     | Protein disulfide-isomerase A6                                | Biological Replicate 2 Only | 1                           |
| Q6ZV65     | Protein FAM47E                                                | Biological Replicate 2 Only | 1                           |
| P06703     | Protein S100-A6                                               | Biological Replicate 2 Only | 1                           |
| Q8TAB3     | Protocadherin-19                                              | Biological Replicate 2 Only | 1                           |
| O60245     | Protocadherin-7                                               | Biological Replicate 2 Only | 1                           |
| A6NDY2     | Putative protein FAM90A10P                                    | Biological Replicate 2 Only | 1                           |
| V9HWB8     | Pyruvate kinase                                               | Biological Replicate 2 Only | 1                           |
| Q6FG99     | RPLP1 protein                                                 | Biological Replicate 2 Only | 1                           |
| A0A087WXA3 | Serine/arginine repetitive matrix protein 3                   | Biological Replicate 2 Only | 1                           |
| A0A1B0GTZ4 | Serine/threonine-protein kinase DCLK3                         | Biological Replicate 2 Only | 1                           |
| Q9H4A3     | Serine/threonine-protein kinase WNK1                          | Biological Replicate 2 Only | 1                           |
| B7ZKT5     | Son of sevenless homolog 2                                    | Biological Replicate 2 Only | 1                           |
| B5MBX0     | Sororin                                                       | Biological Replicate 2 Only | 1                           |
| P31948     | Stress-induced-phosphoprotein 1                               | Biological Replicate 2 Only | 1                           |
| O15400     | Syntaxin-7                                                    | Biological Replicate 2 Only | 1                           |
| A0A0C4DH28 | T cell receptor gamma variable 4                              | Biological Replicate 2 Only | 1                           |
| P82094     | TATA element modulatory factor                                | Biological Replicate 2 Only | 1                           |
| J3KNP2     | Transducin beta-like protein 3                                | Biological Replicate 2 Only | 1                           |
| P55072     | Transitional endoplasmic reticulum ATPase -ATPase p97 subunit | Biological Replicate 2 Only | 1                           |
| H7BYY1     | Tropomyosin 1                                                 | Biological Replicate 2 Only | 1                           |
| B2R6L0     | Tubulin beta chain                                            | Biological Replicate 2 Only | 1                           |
| Q13509     | Tubulin beta-3 chain                                          | Biological Replicate 2 Only | 3                           |
| Q9BUF5     | Tubulin beta-6 chain                                          | Biological Replicate 2 Only | 2                           |
| K7EK43     | Tubulin beta-6 chain                                          | Biological Replicate 2 Only | 1                           |
| Q6IBS0     | Twinfilin-2                                                   | Biological Replicate 2 Only | 1                           |
| Q5UGI3     | Ubiquitin C splice variant                                    | Biological Replicate 2 Only | 1                           |
| Q15819     | Ubiquitin-conjugating enzyme E2 variant 2                     | Biological Replicate 2 Only | 1                           |
| P18206     | Vinculin                                                      | Biological Replicate 2 Only | 2                           |

| Uniprot ID | Protein Name                                                                                    | Biological Replicate       | Number of Modified Peptides |
|------------|-------------------------------------------------------------------------------------------------|----------------------------|-----------------------------|
| P55036     | 26S proteasome non-ATPase regulatory subunit 4                                                  | Both Biological Replicates | 2                           |
| F2Z340     | 2-amino-3-ketobutyrate coenzyme A ligase                                                        | Both Biological Replicates | 2                           |
| Q9H0U6     | 39S ribosomal protein L18                                                                       | Both Biological Replicates | 2                           |
| P63220     | 40S ribosomal protein S21                                                                       | Both Biological Replicates | 3                           |
| P23396     | 40S ribosomal protein S3                                                                        | Both Biological Replicates | 2                           |
| P60709     | Actin                                                                                           | Both Biological Replicates | 3                           |
| A0A0S2Z5W7 | Acyl-CoA binding domain containing 4                                                            | Both Biological Replicates | 2                           |
| Q9HDC9     | Adipocyte plasma membrane-associated protein                                                    | Both Biological Replicates | 2                           |
| P06733     | Alpha-enolase                                                                                   | Both Biological Replicates | 5                           |
| L8E9I3     | Alternative protein TRIM67                                                                      | Both Biological Replicates | 2                           |
| P15144     | Aminopeptidase N                                                                                | Both Biological Replicates | 5                           |
| Q6ZTN6     | Ankyrin repeat domain-containing protein 13D                                                    | Both Biological Replicates | 2                           |
| P07355     | Annexin A2                                                                                      | Both Biological Replicates | 4                           |
| V9HW31     | ATP synthase subunit beta                                                                       | Both Biological Replicates | 5                           |
| A0A024R5H0 | Barrier to autointegration factor 1                                                             | Both Biological Replicates | 2                           |
| P35613     | Basigin                                                                                         | Both Biological Replicates | 3                           |
| A7XZE4     | Beta tropomyosin                                                                                | Both Biological Replicates | 2                           |
| Q9UE89     | Beta-actin                                                                                      | Both Biological Replicates | 3                           |
| P07814     | Bifunctional glutamate/proline--tRNA ligase                                                     | Both Biological Replicates | 2                           |
| P80723     | Brain acid soluble protein 1                                                                    | Both Biological Replicates | 2                           |
| H0YAH7     | Bromodomain-containing protein 8                                                                | Both Biological Replicates | 2                           |
| E7EMB3     | Calmodulin-2                                                                                    | Both Biological Replicates | 3                           |
| A0A0C4DGQ5 | Calpain small subunit 1                                                                         | Both Biological Replicates | 2                           |
| P51911     | Calponin-1                                                                                      | Both Biological Replicates | 2                           |
| V9HW88     | Calreticulin                                                                                    | Both Biological Replicates | 4                           |
| B2CIS9     | Caspase 14                                                                                      | Both Biological Replicates | 4                           |
| A0A024R5K1 | Coronin                                                                                         | Both Biological Replicates | 2                           |
| P0C869     | Cytosolic phospholipase A2 beta                                                                 | Both Biological Replicates | 2                           |
| O43175     | D-3-phosphoglycerate dehydrogenase                                                              | Both Biological Replicates | 2                           |
| P33316     | Deoxyuridine 5'-triphosphate nucleotidohydrolase                                                | Both Biological Replicates | 2                           |
| Q08554     | Desmocollin-1                                                                                   | Both Biological Replicates | 2                           |
| P36957     | hydrolipoyllysine-residue succinyltransferase component of 2-oxoglutarate dehydrogenase complex | Both Biological Replicates | 2                           |
| A0A1B0GTX1 | Dynamin-binding protein                                                                         | Both Biological Replicates | 2                           |
| Q53G85     | Elongation factor 1-alpha                                                                       | Both Biological Replicates | 2                           |
| Q9Y6I0     | Endogenous retrovirus group K member 6                                                          | Both Biological Replicates | 2                           |
| V9HW22     | Epididymis luminal protein 33                                                                   | Both Biological Replicates | 2                           |
| A0A024R3X4 | Epididymis secretory sperm binding protein                                                      | Both Biological Replicates | 3                           |
| P56537     | Eukaryotic translation initiation factor 6 GCN homolog                                          | Both Biological Replicates | 2                           |
| O15540     | Fatty acid-binding protein                                                                      | Both Biological Replicates | 2                           |
| Q2NNQ8     | FER-1-like protein 4                                                                            | Both Biological Replicates | 2                           |
| Q9NVK5     | FGFR1 oncogene partner 2                                                                        | Both Biological Replicates | 2                           |
| P21333     | Filamin-A                                                                                       | Both Biological Replicates | 2                           |
| O75369     | Filamin-B                                                                                       | Both Biological Replicates | 2                           |
| P04406     | Glyceraldehyde-3-phosphate dehydrogenase                                                        | Both Biological Replicates | 4                           |
| A0A0J9YX86 | Golgin subfamily A member 8Q                                                                    | Both Biological Replicates | 2                           |
| Q9HAV7     | GrpE protein homolog 1                                                                          | Both Biological Replicates | 2                           |
| B2RTU6     | HCG1981012                                                                                      | Both Biological Replicates | 2                           |
| P07900     | Heat shock protein HSP 90-alpha                                                                 | Both Biological Replicates | 2                           |
| P61978     | Heterogeneous nuclear ribonucleoprotein K                                                       | Both Biological Replicates | 2                           |
| A0A087X0X3 | Heterogeneous nuclear ribonucleoprotein M                                                       | Both Biological Replicates | 2                           |
| B2R4R0     | Histone H4                                                                                      | Both Biological Replicates | 3                           |
| Q9Y471     | Inactive cytidine monophosphate-N-acetylneuraminic acid hydroxylase                             | Both Biological Replicates | 2                           |
| Q9BZV3     | Interphotoreceptor matrix proteoglycan 2                                                        | Both Biological Replicates | 2                           |

| Uniprot ID | Protein Name                                                     | Biological Replicate       | Number of Modified Peptides |
|------------|------------------------------------------------------------------|----------------------------|-----------------------------|
| M0R2W5     | Kallikrein-2                                                     | Both Biological Replicates | 2                           |
| H6VRG1     | Keratin 1                                                        | Both Biological Replicates | 2                           |
| P05783     | Keratin                                                          | Both Biological Replicates | 2                           |
| P08727     | Keratin                                                          | Both Biological Replicates | 8                           |
| P08729     | Keratin                                                          | Both Biological Replicates | 2                           |
| P05787     | Keratin                                                          | Both Biological Replicates | 6                           |
| P00338     | L-lactate dehydrogenase A chain                                  | Both Biological Replicates | 3                           |
| A0A024R4K3 | Malate dehydrogenase                                             | Both Biological Replicates | 2                           |
| Q9NR99     | Matrix-remodeling-associated protein 5                           | Both Biological Replicates | 2                           |
| G8JLA2     | Myosin light polypeptide 6                                       | Both Biological Replicates | 3                           |
| A0A024R1N1 | Myosin                                                           | Both Biological Replicates | 3                           |
| P29966     | Myristoylated alanine-rich C-kinase substrate                    | Both Biological Replicates | 2                           |
| O94760     | N                                                                | Both Biological Replicates | 2                           |
| Q09666     | Neuroblast differentiation-associated protein AHNAK              | Both Biological Replicates | 7                           |
| Q32Q12     | Nucleoside diphosphate kinase                                    | Both Biological Replicates | 2                           |
| B0FTY2     | NudC-like protein                                                | Both Biological Replicates | 2                           |
| A8K486     | Peptidyl-prolyl cis-trans isomerase                              | Both Biological Replicates | 2                           |
| V9HWF4     | Phosphoglycerate kinase                                          | Both Biological Replicates | 2                           |
| P02545     | Prelamin-A/C                                                     | Both Biological Replicates | 7                           |
| P26196     | Probable ATP-dependent RNA helicase DDX6                         | Both Biological Replicates | 2                           |
| P25786     | Proteasome subunit alpha type-1                                  | Both Biological Replicates | 2                           |
| Q9UKY7     | Protein CDV3 homolog                                             | Both Biological Replicates | 2                           |
| Q9NTK1     | Protein DEPP1                                                    | Both Biological Replicates | 2                           |
| V9HVV3     | Protein disulfide-isomerase                                      | Both Biological Replicates | 4                           |
| A0A024R8S5 | Protein disulfide-isomerase                                      | Both Biological Replicates | 2                           |
| Q7Z4L9     | Protein phosphatase 1 regulatory subunit 42                      | Both Biological Replicates | 2                           |
| Q92734     | Protein TFG                                                      | Both Biological Replicates | 2                           |
| A6NC97     | Putative protein FAM172B                                         | Both Biological Replicates | 2                           |
| Q5T035     | Putative uncharacterized protein C9orf129                        | Both Biological Replicates | 2                           |
| P11177     | Pyruvate dehydrogenase E1 component subunit beta                 | Both Biological Replicates | 2                           |
| Q96Q15     | Serine/threonine-protein kinase SMG1                             | Both Biological Replicates | 2                           |
| F8W1A0     | Serine/threonine-protein phosphatase PP1-gamma catalytic subunit | Both Biological Replicates | 2                           |
| Q7RTN6     | STE20-related kinase adapter protein alpha                       | Both Biological Replicates | 2                           |
| Q53G55     | TNF receptor-associated protein 1 variant                        | Both Biological Replicates | 4                           |
| P37802     | Transgelin-2                                                     | Both Biological Replicates | 9                           |
| P29401     | Transketolase                                                    | Both Biological Replicates | 3                           |
| A0A024R9Z1 | Transmembrane protein 106B                                       | Both Biological Replicates | 2                           |
| B7Z596     | Tropomyosin alpha-1 chain                                        | Both Biological Replicates | 2                           |
| P67936     | Tropomyosin alpha-4 chain                                        | Both Biological Replicates | 3                           |
| F5H5D3     | Tubulin alpha chain                                              | Both Biological Replicates | 2                           |
| P07437     | Tubulin beta chain                                               | Both Biological Replicates | 7                           |
| P68371     | Tubulin beta-4B chain                                            | Both Biological Replicates | 3                           |
| O43399     | Tumor protein D54                                                | Both Biological Replicates | 2                           |
| Q9UF64     | Uncharacterized protein DKFZp434E199                             | Both Biological Replicates | 2                           |
| P08670     | Vimentin                                                         | Both Biological Replicates | 6                           |
| P16989     | Y-box-binding protein 3                                          | Both Biological Replicates | 2                           |
| O15015     | Zinc finger protein 646                                          | Both Biological Replicates | 2                           |



Table S6. Oxidatively modified peptides and residues in the fractionated and unfractionated CHO cell samples.

| Protein      | Fractionated |                                 |                                             | Unfractionated |                                        |                                       |
|--------------|--------------|---------------------------------|---------------------------------------------|----------------|----------------------------------------|---------------------------------------|
|              | Peptide      | Sequence                        | Modified Residues                           | Peptide        | Sequence                               | Modified Residues                     |
| <b>Coil</b>  | 1-10         | MMEAKFYEEK                      | E3; E8                                      |                |                                        |                                       |
|              | 24-33        | LHSAVAEMEK                      | H2; E7; E9                                  |                |                                        |                                       |
|              | 41-56        | RHTETIQELLEDTNMR                | H2                                          |                |                                        |                                       |
|              | 42-56        | HTETIQELLEDTNMR                 | E7; E10                                     |                |                                        |                                       |
|              | 130-140      | EKEHLASDYEK                     | E1; E3; D8; H4                              |                |                                        |                                       |
|              | 149-157      | YDSDLNLLK                       | D2                                          |                |                                        |                                       |
|              | 198-207      | DQENKFHMER                      | E3; E9                                      |                |                                        |                                       |
|              | 203-211      | FHMERNHLK                       | H7                                          |                |                                        |                                       |
|              | 208-216      | NHLKHTYDK                       | H2; H5                                      |                |                                        |                                       |
|              | 217-227      |                                 |                                             | 217-227        | KVHELQSELDK                            | H3; L5; L9                            |
|              | 218-229      | VHELQSELDKEK                    | E11                                         |                |                                        |                                       |
|              | 247-258      | EEQLSRMTEVQR                    | E1; E2                                      |                |                                        |                                       |
|              | 259-272      | SQAQQADAALAEFK                  | D7; E11                                     |                |                                        |                                       |
|              | 274-287      | QVEVNSEKVYAEMK                  | E12                                         |                |                                        |                                       |
|              | 331-348      | LEHEQEKTLLQQHNAEK               | H3; H9; H14                                 |                |                                        |                                       |
|              | 349-357      | DSLVRDHER                       | H7; E8                                      |                |                                        |                                       |
| <b>BiP</b>   | 354-364      | DHEREIENLEK                     | D1; E5; E7                                  |                |                                        |                                       |
|              | 365-381      | QLRAANMEHENQIQESK               | H9                                          |                |                                        |                                       |
|              | 368-381      | AANMEHENQIQESK                  | H6; E12                                     |                |                                        |                                       |
|              | 383-393      | RDAQPWRPFCK                     | D2                                          |                |                                        |                                       |
|              |              |                                 |                                             |                |                                        |                                       |
|              | 541-553      | MVNDAEKFAEEDK                   | E10; E11                                    |                |                                        |                                       |
|              |              |                                 |                                             |                |                                        |                                       |
|              |              |                                 |                                             |                |                                        |                                       |
|              |              |                                 |                                             |                |                                        |                                       |
|              |              |                                 |                                             |                |                                        |                                       |
|              |              |                                 |                                             |                |                                        |                                       |
|              |              |                                 |                                             |                |                                        |                                       |
|              |              |                                 |                                             |                |                                        |                                       |
|              |              |                                 |                                             |                |                                        |                                       |
|              |              |                                 |                                             |                |                                        |                                       |
|              |              |                                 |                                             |                |                                        |                                       |
| <b>Actin</b> |              |                                 |                                             |                |                                        |                                       |
|              | 69-95        | YPIEHGIVTNWDDMEKIW<br>HHTFYNELR | I3; I7; I8                                  |                |                                        |                                       |
|              | 96-113       | VAPEEHPVLLTEAPLNPK              | A2; E12; E4; E5; H6;<br>L10; P3; P7; V1; V8 |                |                                        |                                       |
|              | 148-178      |                                 |                                             | 148-178        | TTGIVMDSGDGV<br>THTVPIYEGYALP<br>HAILR | D10; D7; H14; I4; M6;<br>V12; V16; V5 |
|              | 197-206      | GYSFTTTAER                      | Y2; F4                                      |                |                                        |                                       |
|              | 291-312      | KDLYANTVLSSGGTTMYPG<br>IADR     | L9; M15; Y16; R22                           |                |                                        |                                       |
|              | 292-312      | DLYANTVLSSGGTTMYPGI<br>ADR      | L8; M14; N5; V7                             | 292-312        | DLYANTVLSSGGT<br>TMYPGIADR             | M14                                   |
|              | 360-372      | QEYDESGPSIVHR                   | D4; E5; Y3                                  |                |                                        |                                       |
|              | 360-373      | QEYDESGPSIVHRK                  | Y3; D4                                      | 360-373        | QEYDESGPSIVH<br>RK                     | H12                                   |

Table S7. Peptide modifications per protein oxidatively modified in CHO fractionated and non-fractionated samples.

| Uniprot ID of Proteins in Common | Protein Name                                                  | Unfractionated Peptide Number Modified | Fractionated Number of Peptides Modified |
|----------------------------------|---------------------------------------------------------------|----------------------------------------|------------------------------------------|
| G3IFZ0                           | Antigen KI-67                                                 | 1                                      | 43                                       |
| G3I488                           | Eukaryotic translation initiation factor                      | 1                                      | 27                                       |
| G3HN02                           | tRNA guanylyltransferase                                      | 2                                      | 24                                       |
| G3H4S1                           | Phosphatidylinositol 3,4,5-trisphosphate-dependent Rac        |                                        |                                          |
| G3HXJ8                           | exchanger 1                                                   | 1                                      | 20                                       |
|                                  | Choline/ethanolaminephosphotransferase 1                      | 1                                      | 19                                       |
|                                  | Constitutive coactivator of peroxisome proliferator-activated |                                        |                                          |
| G3H9V2                           | receptor gamma                                                | 1                                      | 19                                       |
| G3GZB3                           | Pre-mRNA-splicing factor SYF1                                 | 1                                      | 19                                       |
| G3HXE4                           | Calcium release-activated calcium channel                     | 1                                      | 18                                       |
| G3H718                           | Kyphoscoliosis peptidase                                      | 1                                      | 16                                       |
| G3H3B4                           | Rho guanine nucleotide exchange factor 17                     | 1                                      | 12                                       |
| G3H1K9                           | Alpha--fucosyltransferase                                     | 2                                      | 10                                       |
| G3GZ90                           | Cartilage intermediate layer                                  | 1                                      | 10                                       |
| G3HE04                           | TKTL2                                                         | 1                                      | 10                                       |
| G3H2N7                           | Cordon-bleu                                                   | 2                                      | 9                                        |
| G3HYU7                           | Flt3-interacting zinc finger                                  | 1                                      | 9                                        |
| G3HWC3                           | FOXR2                                                         | 3                                      | 8                                        |
| G3HN72                           | NET1                                                          | 1                                      | 8                                        |
| G3GU05                           | Peptidyl-tRNA hydrolase 2, mitochondrial                      | 1                                      | 8                                        |
| G3I0S4                           | Regulating synaptic membrane exocytosis                       | 1                                      | 8                                        |
| G3H1V7                           | Actin, cytoplasmic 2                                          | 3                                      | 7                                        |
| G3I3A0                           | Complement component C8 gamma chain                           | 1                                      | 7                                        |
| G3H3W4                           | LATS2                                                         | 1                                      | 7                                        |
| G3GU92                           | MMP21                                                         | 2                                      | 7                                        |
| G3HF72                           | Nicotinamide phosphoribosyltransferase                        | 1                                      | 7                                        |
| G3HYT6                           | tRNA-specific adenosine deaminase 2                           | 1                                      | 7                                        |
| G3IF65                           | Apical endosomal glyco                                        | 1                                      | 6                                        |
| G3HHR6                           | Calpain 11                                                    | 1                                      | 6                                        |
| G3GVZ4                           | Cell division cycle and apoptosis regulator                   | 1                                      | 6                                        |
| G3HVV8                           | S-methyl-5'-thioadenosine phosphorylase                       | 1                                      | 6                                        |
| G3HGA3                           | Smoothelin                                                    | 1                                      | 6                                        |
| G3H8R0                           | Spatacsin                                                     | 3                                      | 6                                        |
| G3I9Q8                           | Thyrotropin-releasing hormone-degrading ectoenzyme            | 1                                      | 6                                        |
| G3HVK8                           | All-trans-retinol 13,14-reductase                             | 1                                      | 5                                        |
| G3HSL4                           | Eukaryotic translation initiation factor 4 gamma 3            | 2                                      | 5                                        |
| G3H884                           | Limbin                                                        | 1                                      | 5                                        |
| G3HTA4                           | MEN1                                                          | 1                                      | 5                                        |
| G3HYJ9                           | Neurogenic locus notch homolog                                | 2                                      | 5                                        |
| G3HZU7                           | Pre-mRNA-processing factor 6                                  | 1                                      | 5                                        |
| G3HIP2                           | Putative phospholipid-transporting ATPase IM                  | 2                                      | 5                                        |
| G3GSH2                           | Salivary plasminogen activator alpha 2                        | 1                                      | 5                                        |
| G3HPA2                           | Suppressor of tumorigenicity                                  | 1                                      | 5                                        |
| G3GVD0                           | Activation-induced cytidine deaminase                         | 2                                      | 4                                        |
| G3HDZ3                           | A-kinase anchor                                               | 1                                      | 4                                        |
| G3HZA3                           | Lactation elevated                                            | 1                                      | 4                                        |
| G3HSE4                           | Rapamycin-insensitive companion of mTOR                       | 1                                      | 4                                        |
| G3IAG4                           | RP1L1                                                         | 3                                      | 4                                        |
| G3HGF4                           | Transcription factor 12                                       | 1                                      | 4                                        |
| G3GXT2                           | Calcium-independent phospholipase A2-gamma                    | 1                                      | 3                                        |
| G3GRX6                           | Carbonic anhydrase 3                                          | 1                                      | 3                                        |
| G3HG60                           | Fibrillin-1                                                   | 1                                      | 3                                        |

| Uniprot ID of Proteins in Common | Protein Name                                       | Unfractionated Peptide Number Modified | Fractionated Number of Peptides Modified |
|----------------------------------|----------------------------------------------------|----------------------------------------|------------------------------------------|
| G3HDG3                           | Palladin                                           | 1                                      | 3                                        |
| G3H6T0                           | Cysteine and histidine-rich                        | 1                                      | 2                                        |
| G3I7J6                           | Glycerol-3-phosphate dehydrogenase                 | 2                                      | 2                                        |
| G3IAS7                           | Glyco                                              | 1                                      | 2                                        |
| G3GRY1                           | ITFG3                                              | 1                                      | 2                                        |
| G3HCG3                           | Pre-mRNA-splicing factor SYF2                      | 1                                      | 2                                        |
| G3H2J8                           | Sodium/hydrogen exchanger                          | 4                                      | 2                                        |
| G3HSZ4                           | TNFAIP3-interacting                                | 1                                      | 2                                        |
| G3I8B9                           | ARFIP2                                             | 1                                      | 1                                        |
| Q9ERF7                           | L-dopachrome tautomerase                           | 11                                     | 1                                        |
| G3HYW2                           | Murinoglobulin-1                                   | 1                                      | 1                                        |
| G3GWT5                           | Nucleoside diphosphate-linked moiety X motif 6     | 2                                      | 1                                        |
| G3GYJ4                           | Ras-specific guanine nucleotide-releasing factor 1 | 1                                      | 1                                        |
